# Supplementary material for: Selective synthesis of trisubstituted pyrroles through the reactions of alkynyl Fischer carbene complexes with oxazolones
Source: Royal Society of Chemistry journal article supplement (doi:10.1039/c9ob02411e), 2019-12-11
Supplement: c9ob02411e1.pdf [file c9ob02411e1.pdf]

## Supporting information

### Selective Synthesis of Trisubstituted Pyrroles through the Reactions of Alkynyl Fischer Carbene Complexes with Oxazolones

Julio Lopez,<sup>1</sup> Iván Velazco-Cabral,<sup>1</sup> Eloy Rodríguez-De León,<sup>1</sup> Clarisa Villegas Gómez,<sup>1</sup>  
Francisco Delgado,<sup>2</sup> Ana Arrieta,<sup>3,4</sup> Fernando P. Cossío,<sup>3,4</sup> Miguel A. Vázquez.<sup>1\*</sup>

<sup>1</sup>Departament of Chemistry, University of Guanajuato, Noria Alta S/N, 36050 Guanajuato, Gto., México.

<sup>2</sup>Departament of Organic Chemistry, National School of Biological Sciences-IPN, Prol. Carpio y Plan de Ayala S/N, 11340, CDMX, México.

<sup>3</sup>Departament of Organic Chemistry I and Centro de Innovación en Química Avanzada (ORFEO-CINQA) Universidad del País Vasco/Euskal Herriko Unibertsitatea (UPV/EHU), Manuel Lardizabal Ibilbidea 3, 20018 San Sebastian/Donostia, Spain.

<sup>4</sup>Donostia International Physics Center (DIPC), Manuel Lardizabal Ibilbidea 4, 20018 San Sebastian/Donostia, Spain.

#### Table of contents

|                                                                                                                                                                                   |      |
|-----------------------------------------------------------------------------------------------------------------------------------------------------------------------------------|------|
| <b>Section 1.</b> Instrumental specifications.....                                                                                                                                | S1   |
| <b>Section 2.</b> General method of synthesis, <sup>1</sup> H-NMR, <sup>13</sup> C-NMR, IR Spectra, MS <sup>+</sup> and X-Ray data of compounds <b>2a-d</b> .....                 | S2   |
| <b>Section 3</b> General method of synthesis, <sup>1</sup> H-NMR, <sup>13</sup> C-NMR, IR Spectra, MS <sup>+</sup> and X-Ray data of compounds <b>4a-q, 4g</b> and <b>5</b> ..... | S17  |
| <b>Section 4.</b> General method of synthesis, <sup>1</sup> H-NMR, <sup>13</sup> C-NMR, IR Spectra, MS <sup>+</sup> and X-Ray data of compounds <b>6</b> and <b>7</b> .....       | S91  |
| <b>Section 5</b> General computational methods.....                                                                                                                               | S100 |
| <b>Section 6.</b> Theoretical data.....                                                                                                                                           | S101 |
| <b>Section 7.</b> HPLC analysis of the effect of water on reaction of <b>1a</b> and <b>2a</b> .....                                                                               | S151 |

## SECTION 1

The organometallic reactions were carried out under nitrogen. THF was purchased in TEDIA (www.T2-P2.com, #TS2123-001, with 0.02% of water). On the other hand, the Et<sub>2</sub>O was acquired in Merck (#296082) and was distilled over Na, as well as, dichloromethane (Sigma-Aldrich, #34859) was distilled over CaCl<sub>2</sub>. The products were purified by column chromatography on silica gel (MN Kieselgel 60, 230-400 mesh). Mixtures of ethyl acetate and hexane were used as eluents. Analytical TLC was employed on aluminum sheets (silica gel 60 F/UV254) with visualization carried out with UV light and iodine. Melting points were determined on a digital Electrothermal 90100 melting point apparatus and are uncorrected. <sup>1</sup>H and <sup>13</sup>C NMR spectra (CDCl<sub>3</sub>, DMSO-*d*<sub>6</sub>) were recorded with a Varian Gemini 300 MHz, a Varian VNMR System 500 MHz, a Bruker Ascend 400 MHz, or a Bruker Ultrashield 500 MHz spectrometer. All chemical shifts are reported in ppm relative to Me<sub>4</sub>Si and CHCl<sub>3</sub> used as the internal standard. IR spectra were recorded on potassium bromide plates with a Perkin-Elmer Spectrum 100 FT-IR spectrophotometer. High-resolution mass spectra (HRMS) were determined with electrospray ionization on a Bruker micrOTOF-Q II or electronebulization ionization on a Bruker QTOF mass spectrometer. X-ray data were collected on an Oxford Diffraction Gemini “A” diffractometer with a CCD area detector.

## SECTION 2.

### General method for the synthesis of oxazolones **2a-d**:

In a 25 mL round-bottom flask containing a stirring bar, 1.3 mmol (1.0 equiv) of the appropriate amino acid was added. Then 3.9 mmol (3.0 equiv,  $\rho = 1.511$  g/mL) of trifluoroacetic anhydride was incorporated dropwise and the mixture was stirred for 4 h at room temperature. After this time, the reaction crude was poured into a separation funnel, washed with a saturated solution of  $\text{NaHCO}_3$  (3 x 15 mL) and then extracted with  $\text{CH}_2\text{Cl}_2$ . The organic fractions were evaporated under reduced pressure and the pure compounds **2a-d** were recuperated as viscous liquids.

### Compound **2a**.

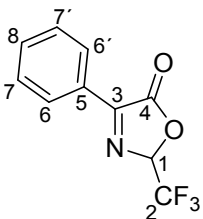

### 4-phenyl-2-(trifluoromethyl)oxazol-5(2H)-one

#### CCDC 1912568

Yield: 95%; yellow solid; mp: 87 °C  $^1\text{H}$  NMR (500 MHz,  $\text{CDCl}_3$ )  $\delta$ : 8.42 (d,  $^3J_{\text{H-H}} = 5.0$  Hz, 2H, H-6,6'), 7.64 (t,  $^3J_{\text{H-H}} = 7.5$  Hz, 1H, H-8), 7.53 (t,  $^3J_{\text{H-H}} = 7.8$  Hz, 2H, H-7,7'), 6.25 (q,  $^3J_{\text{H-F}} = 5.0$  Hz, 1H, H-1).  $^{13}\text{C}$  NMR (125 MHz ( $\text{CDCl}_3$ )  $\delta$ : 162.7 (C=O), 160.6 (C-3), 133.9 (C-8), 129.1 (C-6) 129.0 (C-7), 127.2 (C-5), 120.4 (q,  $^1J_{\text{C-F}} = 280.0$  Hz, C-2), 92.4 (q,  $^1J_{\text{C-C}} = 91.5$  Hz, C-1).

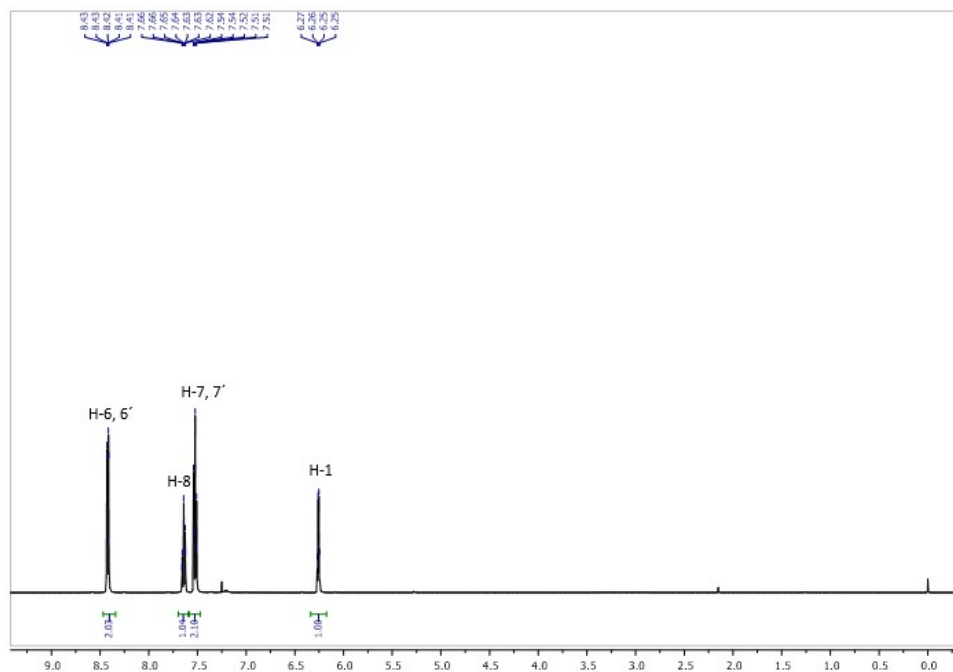

**2a NMR  $^1\text{H}$  ( $\text{CDCl}_3$ , 500 MHz)**

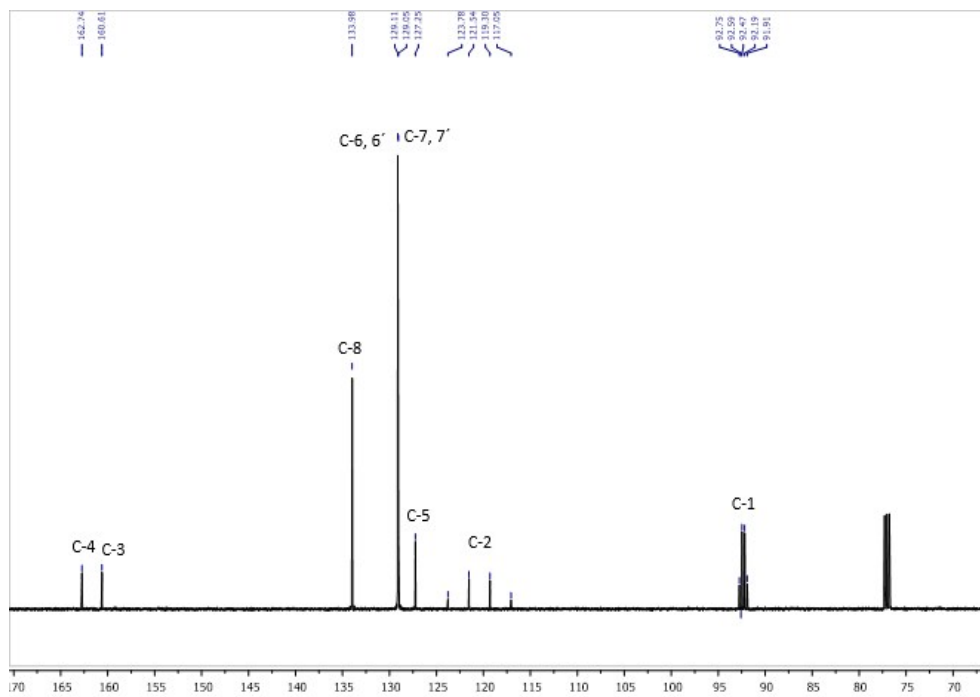

**2a NMR  $^{13}\text{C}$  ( $\text{CDCl}_3$ , 125 MHz)**

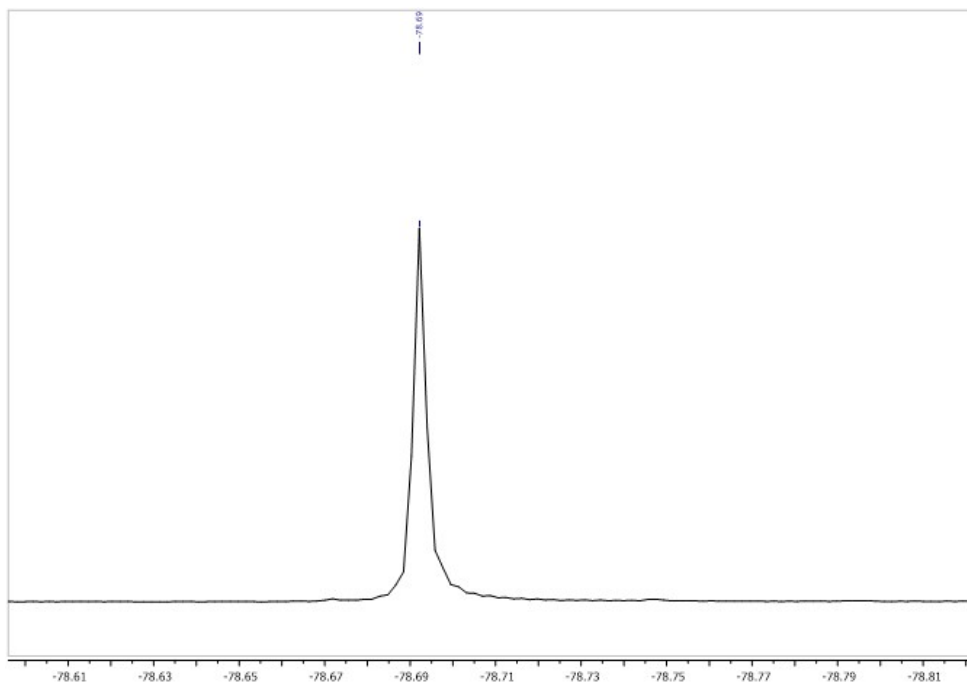

**2a NMR  $^{19}\text{F}$  ( $\text{CDCl}_3$ , 470 MHz)**

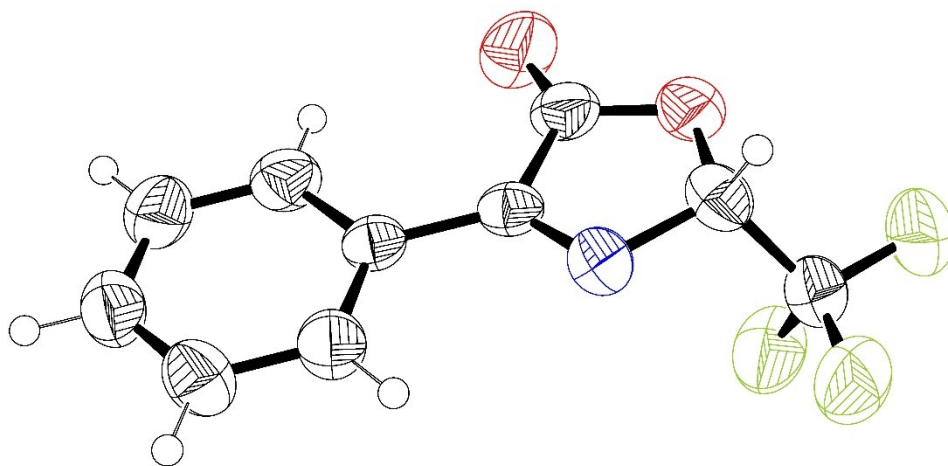

**2a, X-Ray Data CCDC 1912568**

Table 1. Crystal data and structure refinement for **2a**.

|                                   |                                                                |          |
|-----------------------------------|----------------------------------------------------------------|----------|
| Identification code               | <b>2a</b>                                                      |          |
| Empirical formula                 | C <sub>10</sub> H <sub>6</sub> F <sub>3</sub> N O <sub>2</sub> |          |
| Formula weight                    | 229.16                                                         |          |
| Temperature                       | 298(2) K                                                       |          |
| Wavelength                        | 0.71073 Å                                                      |          |
| Crystal system                    | Orthorhombic                                                   |          |
| Space group                       | P bca                                                          |          |
| Unit cell dimensions              | a = 10.5916(4) Å                                               | ∠ = 90°. |
|                                   | b = 8.1713(3) Å                                                | ∠ = 90°. |
|                                   | c = 22.3051(8) Å                                               | ∠ = 90°. |
| Volume                            | 1930.44(12) Å <sup>3</sup>                                     |          |
| Z                                 | 8                                                              |          |
| Density (calculated)              | 1.577 Mg/m <sup>3</sup>                                        |          |
| Absorption coefficient            | 0.148 mm <sup>-1</sup>                                         |          |
| F(000)                            | 928                                                            |          |
| Crystal size                      | 0.60 x 0.47 x 0.21 mm <sup>3</sup>                             |          |
| Theta range for data collection   | 2.65 to 25.34°.                                                |          |
| Index ranges                      | -11 ≤ h ≤ 12, -9 ≤ k ≤ 9, -25 ≤ l ≤ 26                         |          |
| Reflections collected             | 6374                                                           |          |
| Independent reflections           | 1764 [R(int) = 0.0133]                                         |          |
| Completeness to theta = 25.34°    | 99.9 %                                                         |          |
| Max. and min. transmission        | 0.9695 and 0.9163                                              |          |
| Refinement method                 | Full-matrix least-squares on F <sup>2</sup>                    |          |
| Data / restraints / parameters    | 1764 / 0 / 146                                                 |          |
| Goodness-of-fit on F <sup>2</sup> | 1.062                                                          |          |
| Final R indices [I > 2σ(I)]       | R1 = 0.0359, wR2 = 0.0874                                      |          |
| R indices (all data)              | R1 = 0.0417, wR2 = 0.0923                                      |          |
| Extinction coefficient            | 0.0125(10)                                                     |          |
| Largest diff. peak and hole       | 0.154 and -0.177 e.Å <sup>-3</sup>                             |          |

Table 2. Atomic coordinates ( $\times 10^4$ ) and equivalent isotropic displacement parameters ( $\text{\AA}^2 \times 10^3$ )

for **2a**.  $U(\text{eq})$  is defined as one third of the trace of the orthogonalized  $U^{ij}$  tensor.

|       | x       | y       | z       | $U(\text{eq})$ |
|-------|---------|---------|---------|----------------|
| C(2)  | 3381(2) | 3869(2) | 1408(1) | 54(1)          |
| C(4)  | 4143(1) | 2936(2) | 955(1)  | 41(1)          |
| C(6)  | 4628(2) | 2007(2) | 1846(1) | 50(1)          |
| C(7)  | 5816(2) | 2392(2) | 2194(1) | 56(1)          |
| C(11) | 4062(1) | 3143(2) | 303(1)  | 40(1)          |
| C(12) | 4853(2) | 2218(2) | -62(1)  | 52(1)          |
| C(13) | 4775(2) | 2333(2) | -676(1) | 60(1)          |
| C(14) | 3916(2) | 3366(2) | -935(1) | 59(1)          |
| C(15) | 3139(2) | 4297(2) | -584(1) | 65(1)          |
| C(16) | 3209(2) | 4198(2) | 35(1)   | 55(1)          |
| N(5)  | 4865(1) | 1908(2) | 1215(1) | 47(1)          |
| O(1)  | 3733(1) | 3269(2) | 1951(1) | 60(1)          |
| O(3)  | 2623(1) | 4936(2) | 1353(1) | 83(1)          |
| F(8)  | 6666(1) | 1231(2) | 2123(1) | 86(1)          |
| F(9)  | 5581(1) | 2521(2) | 2775(1) | 83(1)          |
| F(10) | 6322(1) | 3793(1) | 2022(1) | 82(1)          |

Table 3. Bond lengths [ $\text{\AA}$ ] and angles [ $^\circ$ ] for **2a**.

|            |            |
|------------|------------|
| C(2)-O(3)  | 1.191(2)   |
| C(2)-O(1)  | 1.358(2)   |
| C(2)-C(4)  | 1.502(2)   |
| C(4)-N(5)  | 1.2758(19) |
| C(4)-C(11) | 1.4664(19) |
| C(6)-O(1)  | 1.4203(19) |
| C(6)-N(5)  | 1.4331(18) |
| C(6)-C(7)  | 1.511(2)   |

|             |            |
|-------------|------------|
| C(6)-H(6)   | 0.9800     |
| C(7)-F(8)   | 1.317(2)   |
| C(7)-F(10)  | 1.3207(19) |
| C(7)-F(9)   | 1.3260(18) |
| C(11)-C(16) | 1.384(2)   |
| C(11)-C(12) | 1.391(2)   |
| C(12)-C(13) | 1.376(2)   |
| C(12)-H(12) | 0.9300     |
| C(13)-C(14) | 1.369(2)   |
| C(13)-H(13) | 0.9300     |
| C(14)-C(15) | 1.368(3)   |
| C(14)-H(14) | 0.9300     |
| C(15)-C(16) | 1.385(2)   |
| C(15)-1H5   | 0.9300     |
| C(16)-H(16) | 0.9300     |

|                   |            |
|-------------------|------------|
| O(3)-C(2)-O(1)    | 122.73(15) |
| O(3)-C(2)-C(4)    | 131.58(16) |
| O(1)-C(2)-C(4)    | 105.68(13) |
| N(5)-C(4)-C(11)   | 124.22(13) |
| N(5)-C(4)-C(2)    | 110.45(13) |
| C(11)-C(4)-C(2)   | 125.32(13) |
| O(1)-C(6)-N(5)    | 108.65(12) |
| O(1)-C(6)-C(7)    | 108.71(13) |
| N(5)-C(6)-C(7)    | 111.68(13) |
| O(1)-C(6)-H(6)    | 109.3      |
| N(5)-C(6)-H(6)    | 109.3      |
| C(7)-C(6)-H(6)    | 109.3      |
| F(8)-C(7)-F(10)   | 108.21(15) |
| F(8)-C(7)-F(9)    | 107.63(14) |
| F(10)-C(7)-F(9)   | 106.89(15) |
| F(8)-C(7)-C(6)    | 110.98(14) |
| F(10)-C(7)-C(6)   | 111.71(13) |
| F(9)-C(7)-C(6)    | 111.22(15) |
| C(16)-C(11)-C(12) | 118.70(14) |
| C(16)-C(11)-C(4)  | 122.53(13) |



|                   |            |
|-------------------|------------|
| C(12)-C(11)-C(4)  | 118.76(13) |
| C(13)-C(12)-C(11) | 120.54(15) |
| C(13)-C(12)-H(12) | 119.7      |
| C(11)-C(12)-H(12) | 119.7      |
| C(14)-C(13)-C(12) | 120.20(16) |
| C(14)-C(13)-H(13) | 119.9      |
| C(12)-C(13)-H(13) | 119.9      |
| C(15)-C(14)-C(13) | 120.05(16) |
| C(15)-C(14)-H(14) | 120.0      |
| C(13)-C(14)-H(14) | 120.0      |
| C(14)-C(15)-C(16) | 120.44(16) |
| C(14)-C(15)-1H5   | 119.8      |
| C(16)-C(15)-1H5   | 119.8      |
| C(11)-C(16)-C(15) | 120.07(15) |
| C(11)-C(16)-H(16) | 120.0      |
| C(15)-C(16)-H(16) | 120.0      |
| C(4)-N(5)-C(6)    | 107.75(13) |
| C(2)-O(1)-C(6)    | 107.37(11) |

---

Symmetry transformations used to generate equivalent atoms:

Table 4. Anisotropic displacement parameters ( $\text{\AA}^2 \times 10^3$ ) for **2a**. The anisotropic displacement factor exponent takes the form:  $-2 \sum [ h^2 a^* 2 U^{11} + \dots + 2 h k a^* b^* U^{12} ]$

---

|       | U11   | U22   | U33   | U23    | U13  | U12   |
|-------|-------|-------|-------|--------|------|-------|
| C(2)  | 40(1) | 68(1) | 54(1) | -14(1) | 1(1) | 4(1)  |
| C(4)  | 34(1) | 39(1) | 49(1) | -6(1)  | 2(1) | -5(1) |
| C(6)  | 57(1) | 48(1) | 46(1) | 1(1)   | 7(1) | -8(1) |
| C(7)  | 61(1) | 59(1) | 48(1) | 8(1)   | 0(1) | -1(1) |
| C(11) | 35(1) | 38(1) | 48(1) | -2(1)  | 0(1) | -5(1) |
| C(12) | 54(1) | 51(1) | 51(1) | -3(1)  | 1(1) | 10(1) |
| C(13) | 70(1) | 61(1) | 51(1) | -7(1)  | 8(1) | 5(1)  |

|       |       |        |       |        |        |        |
|-------|-------|--------|-------|--------|--------|--------|
| C(14) | 66(1) | 65(1)  | 47(1) | 5(1)   | -3(1)  | -9(1)  |
| C(15) | 59(1) | 72(1)  | 63(1) | 14(1)  | -8(1)  | 8(1)   |
| C(16) | 46(1) | 56(1)  | 62(1) | 0(1)   | 2(1)   | 10(1)  |
| N(5)  | 53(1) | 42(1)  | 45(1) | -2(1)  | 3(1)   | 0(1)   |
| O(1)  | 52(1) | 81(1)  | 48(1) | -12(1) | 7(1)   | 5(1)   |
| O(3)  | 65(1) | 109(1) | 74(1) | -23(1) | -2(1)  | 43(1)  |
| F(8)  | 83(1) | 98(1)  | 77(1) | 12(1)  | -6(1)  | 33(1)  |
| F(9)  | 92(1) | 111(1) | 45(1) | -2(1)  | -5(1)  | -4(1)  |
| F(10) | 79(1) | 79(1)  | 87(1) | 23(1)  | -24(1) | -31(1) |

## Compound 2b

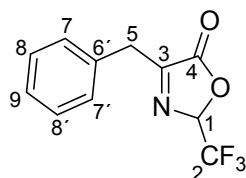

### 4-benzyl-2-(trifluoromethyl)oxazol-5(2H)-one (2b).

Yield: 60%; yellow liquid.  $^1\text{H}$  NMR (500 MHz,  $\text{CDCl}_3$ )  $\delta$ : 7.25-7.20 (m, 5H, H-7-9, 7', 8'), 5.99-5.96 (m, 1H, H-1), 3.96-3.89 (dd,  $^2J_{\text{H-H}} = 5.0$  Hz, 2H, H-5).  $^{13}\text{C}$  NMR (125 MHz,  $\text{CDCl}_3$ )  $\delta$ : 162.7 (C=O), 160.6 (C-3), 133.5 (C-6), 129.8 (C-7, 7'), 129.6 (C-8, 8'), 127.2 (C-9), 120.4 (q,  $^2J_{\text{C-F}} = 280.0$  Hz, C-2), 92.4 (q,  $^1J_{\text{C-C}} = 91.5$  Hz, C-1), 34.8 (C-5).

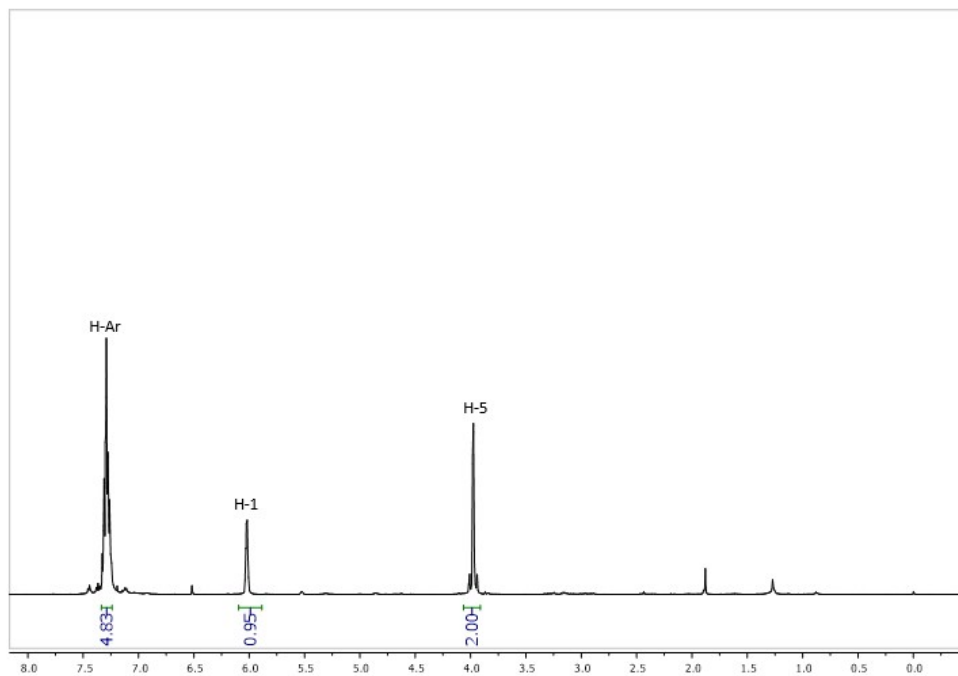

**2b NMR  $^1\text{H}$  ( $\text{CDCl}_3$ , 500 MHz)**

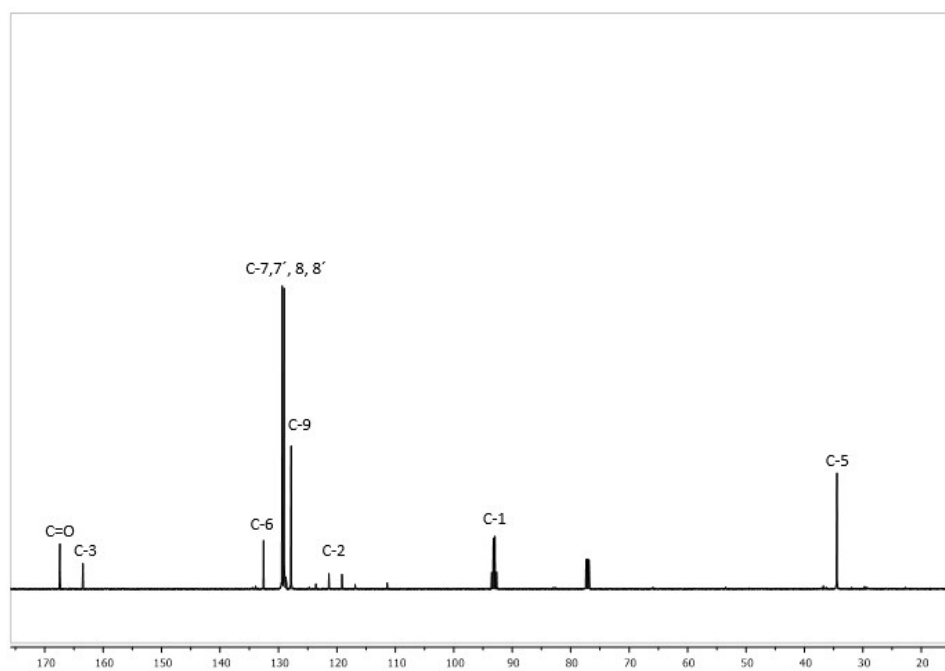

**2b NMR  $^{13}\text{C}$  ( $\text{CDCl}_3$ , 125 MHz)**

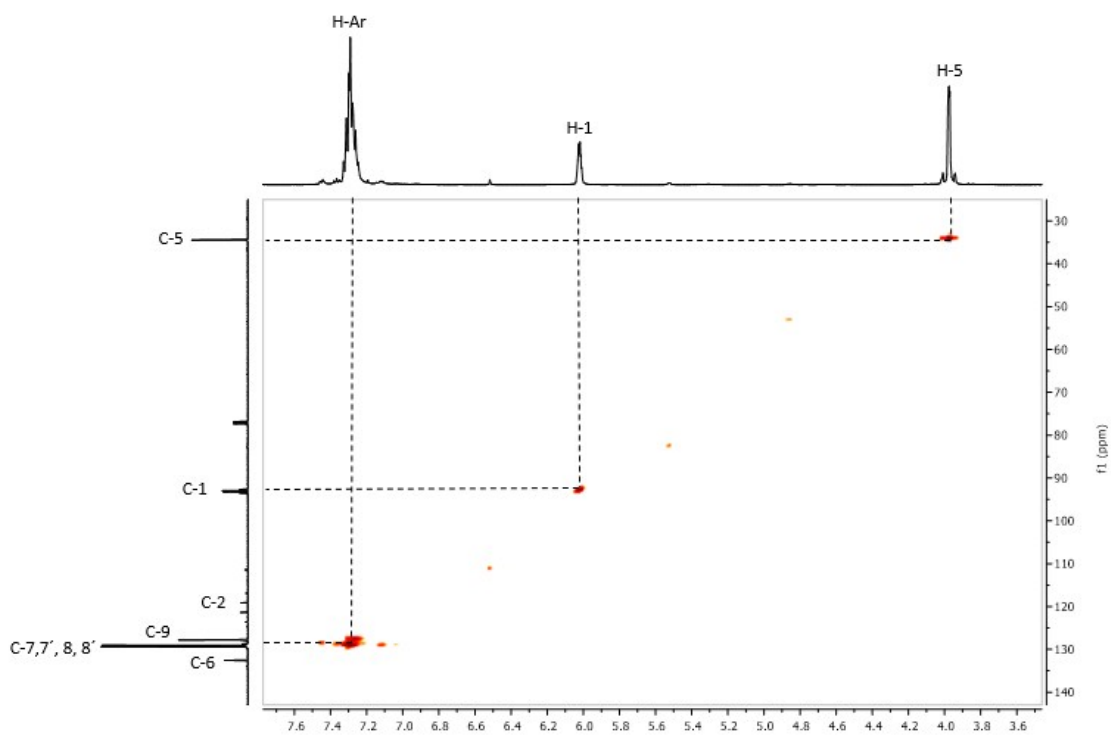

**2b NMR-HSQC (CDCl<sub>3</sub>, 500 MHz)**

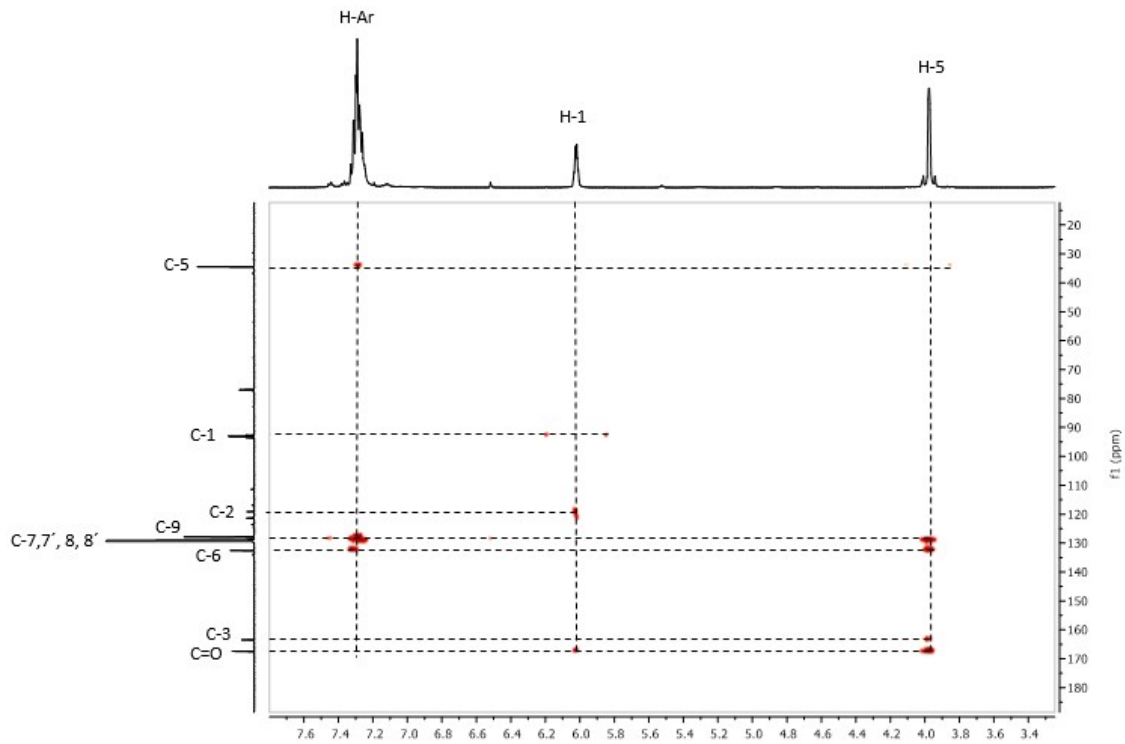

**2b NMR-HMBC (CDCl<sub>3</sub>, 500 MHz)**

## Compound 2c

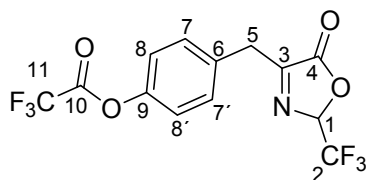

### 4-((5-oxo-2-(trifluoromethyl)-2,5-dihydrooxazol-4-yl)methyl)phenyl 2,2,2-trifluoroacetate.

Yield: 89%; orange liquid.  $^1\text{H}$  NMR (500 MHz,  $\text{CDCl}_3$ )  $\delta$ : 7.35 (d,  $^3J_{\text{H-H}} = 10.0$  Hz, 2H, H-8,8'), 7.15 (d,  $^3J_{\text{H-H}} = 10.0$  Hz, 2H, H-7,7'), 6.06-6.03 (m, 1H, H-1), 4.03-3.96 (m, 1H, H-5).  $^{13}\text{C}$  NMR (125 MHz ( $\text{CDCl}_3$ ))  $\delta$ : 166.9 (C=O), 163.0 (C-3), 148.9 (C-9), 131.7 (C-6), 130.9 (C-8, 8'), 121.1 (C-7, 7'), 117.5 (q,  $^2J_{\text{C-F}} = 283.7$  Hz, C-2), 93.2 (q,  $^1J_{\text{C-C}} = 70.0$  Hz, C-1), 33.8 (C-5).

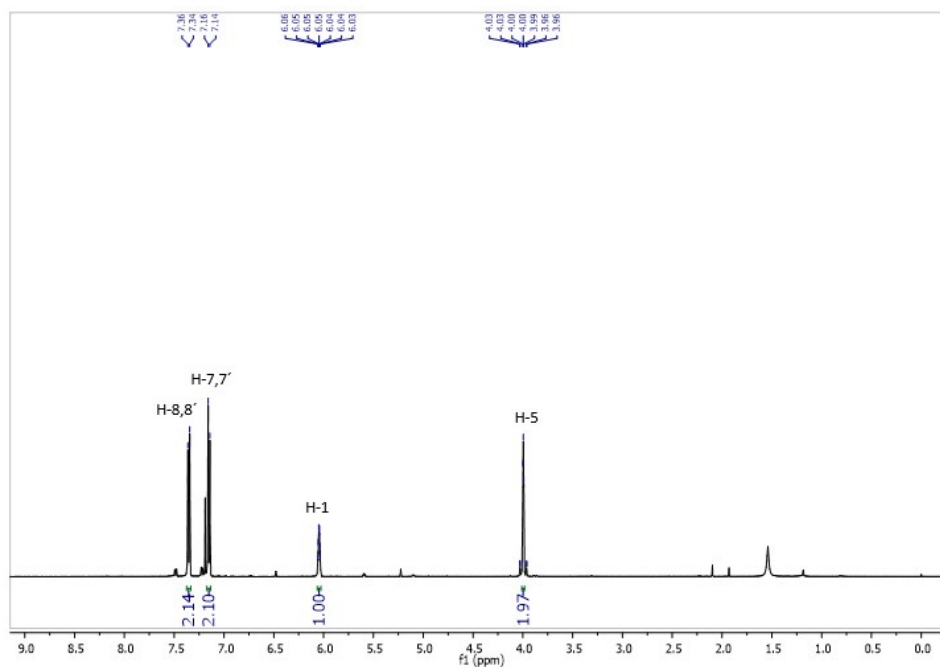

**2c** NMR  $^1\text{H}$  ( $\text{CDCl}_3$ , 500 MHz)

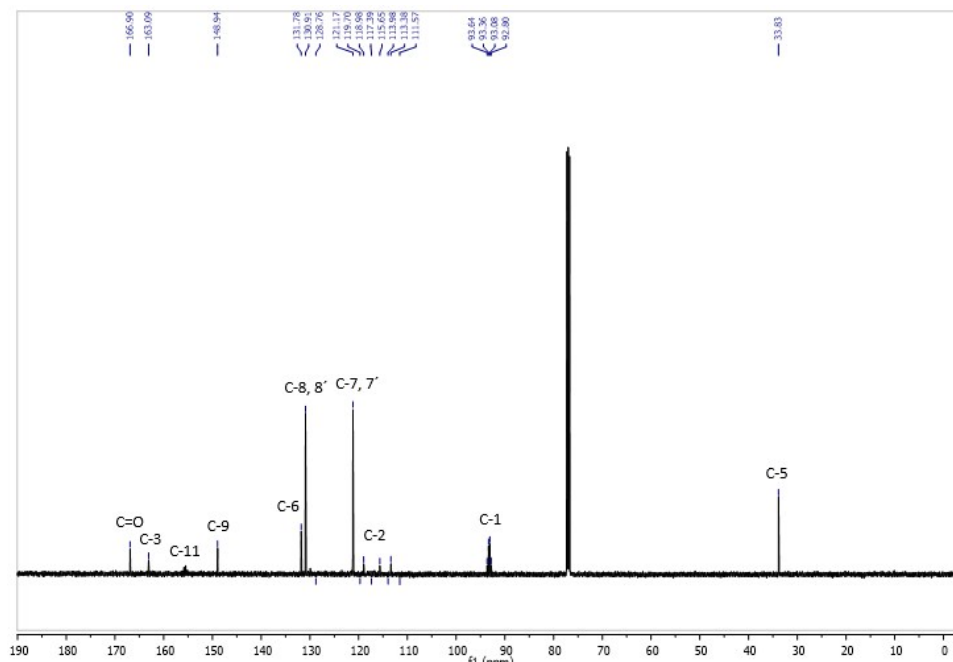

**2c NMR  $^{13}\text{C}$  ( $\text{CDCl}_3$ , 125 MHz)**

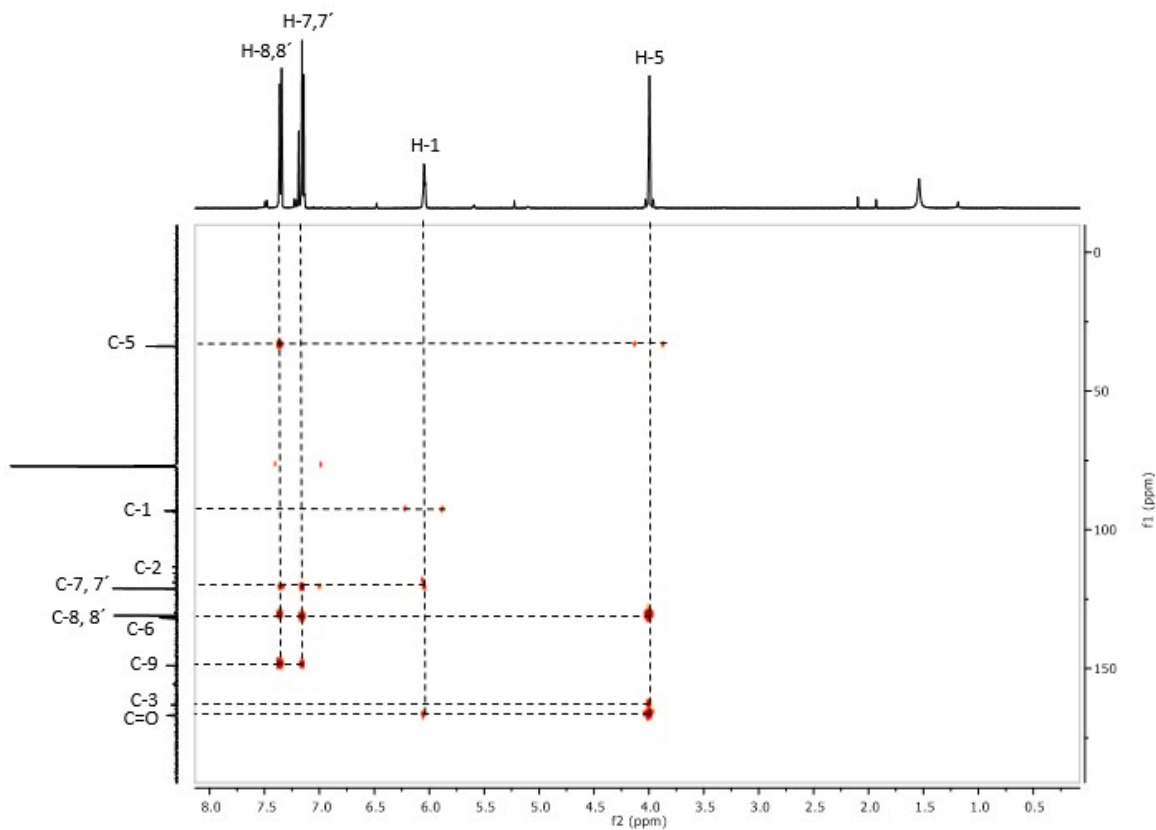

**2c NMR-HMBC ( $\text{CDCl}_3$ , 500 MHz)**

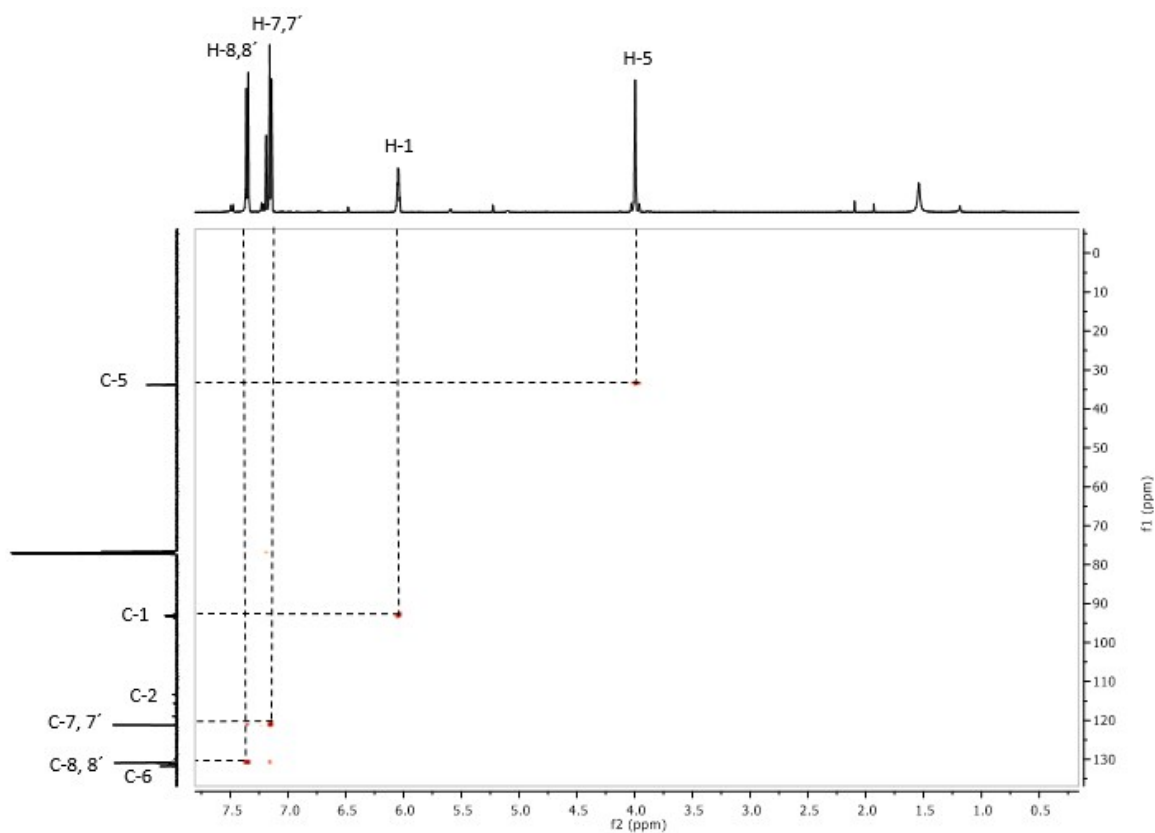

**2c NMR-HSQC (CDCl<sub>3</sub>, 500 MHz)**

### Compound 2d

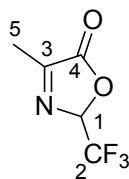

**4-methyl-2-(trifluoromethyl)oxazol-5(2H)-one (2d).** Yield: 95%; orange liquid. <sup>1</sup>H NMR (500 MHz, CDCl<sub>3</sub>) δ: 6.02-6.00 (m, 1H, H-1), 2.33 (s, 3H, H-5). <sup>13</sup>C NMR (125 MHz (CDCl<sub>3</sub>) δ: 166.0 (C=O), 163.7 (C-3), 120.0 (q, <sup>2</sup>J<sub>C-F</sub> = 280.0 Hz, C-2), 93.2 (q, <sup>1</sup>J<sub>C-C</sub> = 70.0 Hz, C-1), 14.2 (C-5).

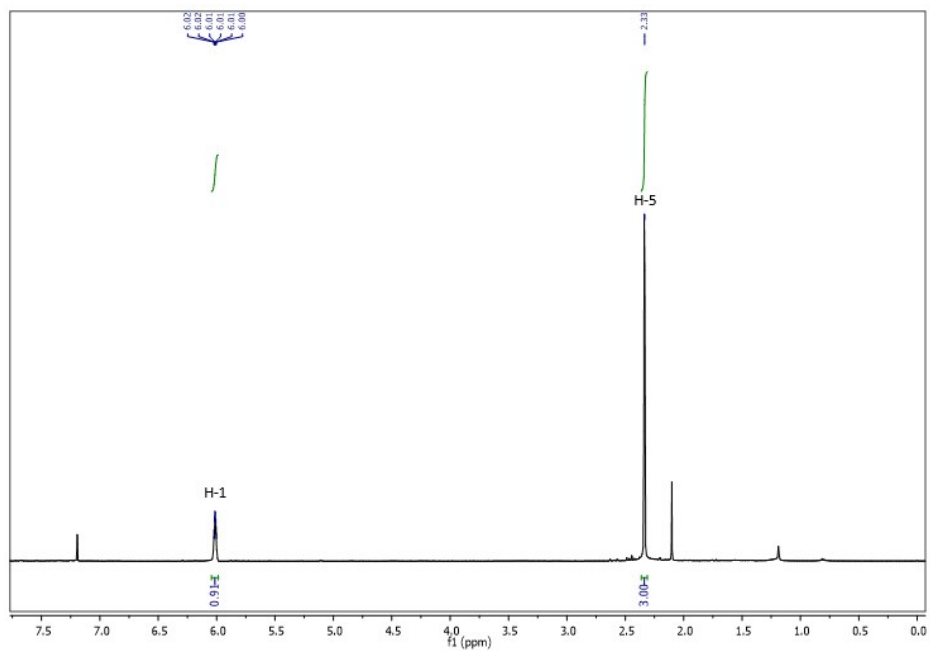

2d NMR <sup>1</sup>H (CDCl<sub>3</sub>, 500 MHz)

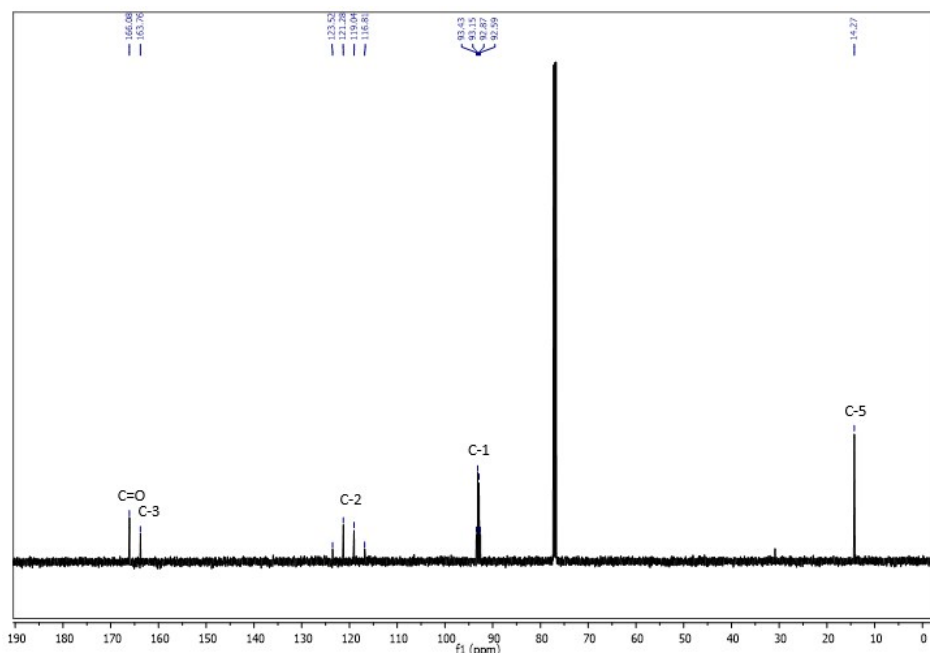

2d NMR <sup>13</sup>C (CDCl<sub>3</sub>, 125 MHz)



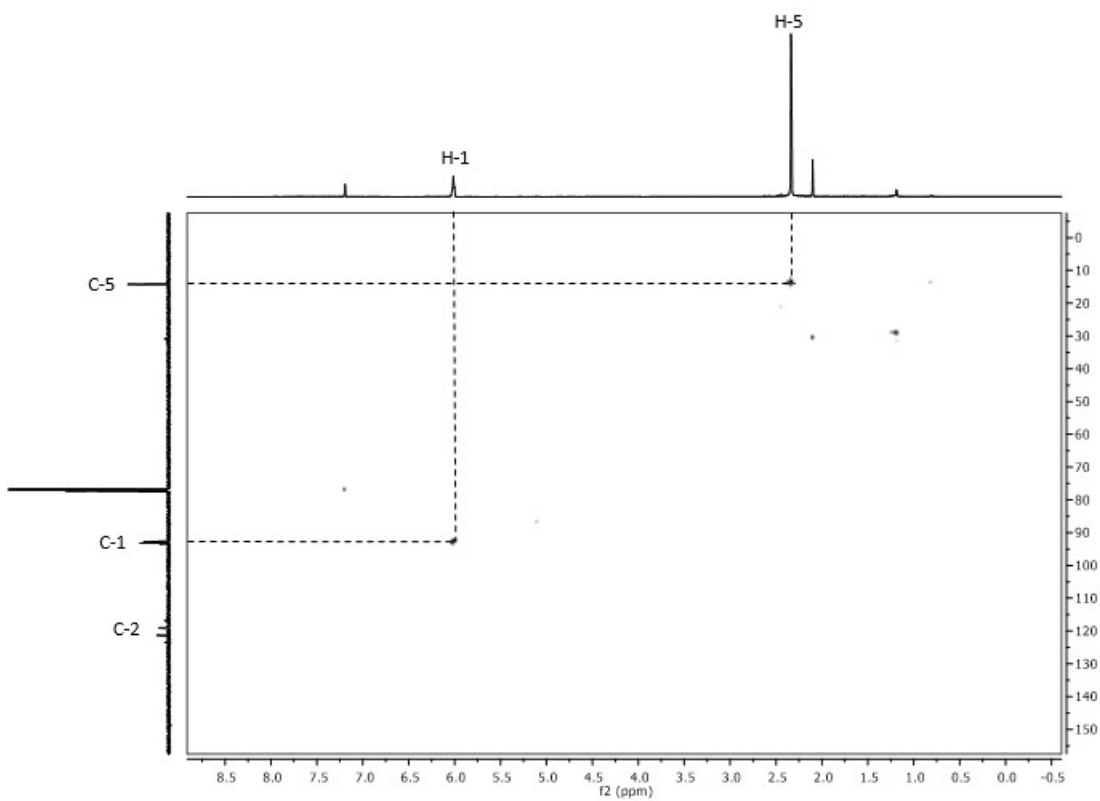

**2d NMR-HSQC (CDCl<sub>3</sub>, 500 MHz)**

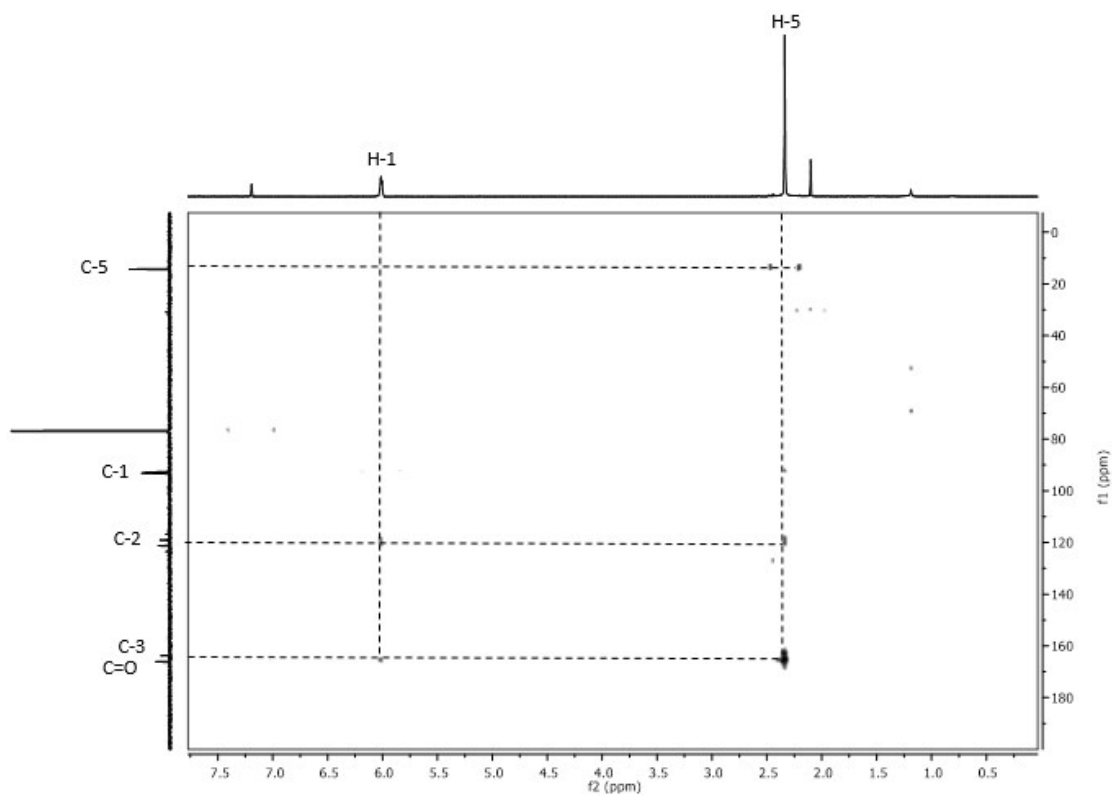

**2d NMR-HBQC (CDCl<sub>3</sub>, 500 MHz)**

### SECTION 3

**General method for the synthesis of pyrroles 4a-f, 4g and 4h-q:** In a 100 mL dried round-bottom flask provided with a stirring bar, 0.9 mmol (1.1 equiv) of the corresponding oxazolone **2a-d** and 0.095 mmol of AgOAc (10 mol%) were added and this mixture was purged for 5 min under a nitrogen flow. Later, 40 mL of THF (TEDIA, www.T2-P2.com, #TS2123-001, with 0.02% of water) were added into the container and 0.9 mmol of Et<sub>3</sub>N (0.5% water, Sigma-Aldrich #T0886) was finally incorporated into the mixture, which was then stirred for a further 30 min at room temperature. Meanwhile, in a separate flask, 0.86 mmol (1.0 equiv) of the corresponding alkynyl Fischer carbene **1a-h** was dissolved in 10 mL of THF and maintained under an inert atmosphere. Once the required reaction time, the solution of the carbene was slowly transferred via cannula into the flask with the oxazolone and then allowed to react for 20–180 min, as judged by TLC monitoring. For **4g**, the D<sub>2</sub>O was added to the mixture of reaction using 5 ml anhydrous THF. The crude reaction mixture was purified by column chromatography (silica gel, 9:1 Hex:AcOEt) and isolated products were recovered under reduced pressure.

#### Compound 4a.

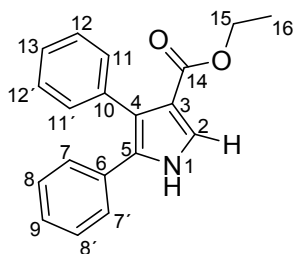

#### Ethyl 4,5-diphenyl-1H-pyrrole-3-carboxylate (**4a**). CCDC 1912115

Yield: 88%; white crystals; mp: 192-194 °C. IR ( $\nu$  cm<sup>-1</sup>) 3327 (N-H), 1685 (C=O). <sup>1</sup>H NMR (500 MHz, CDCl<sub>3</sub>)  $\delta$ : 8.67 (s, 1H, H-1), 7.52 (d, <sup>3</sup>J<sub>H-H</sub> = 5.0 Hz, 1H, H-2), 7.29-7.13 (m, 10H, Ph-H), 4.13 (q, <sup>3</sup>J<sub>H-H</sub> = 7.5 Hz, 2H, H-15), 1.14 (t, <sup>3</sup>J<sub>H-H</sub> = 7.5 Hz, 3H, H-16). <sup>13</sup>C NMR (125 MHz, CDCl<sub>3</sub>)  $\delta$ : 164.7 (C-14), 134.9 (C-10), 132.0 (C-6), 130.8 (C-8), 130.1 (C-12), 128.5 (C-9), 127.6 (C-7), 127.0 (C-13), 126.9 (C-11), 126.5 (C-2), 124.2 (C-4),

122.8 (C-5), 116.4 (C-3), 59.5 (C-15), 14.1 (C-16). HRMS (ESI<sup>+</sup>): m/z calcd. for C<sub>19</sub>H<sub>17</sub>NO<sub>2</sub> [M+Na]<sup>+</sup> 314.1157, found 314.1159.

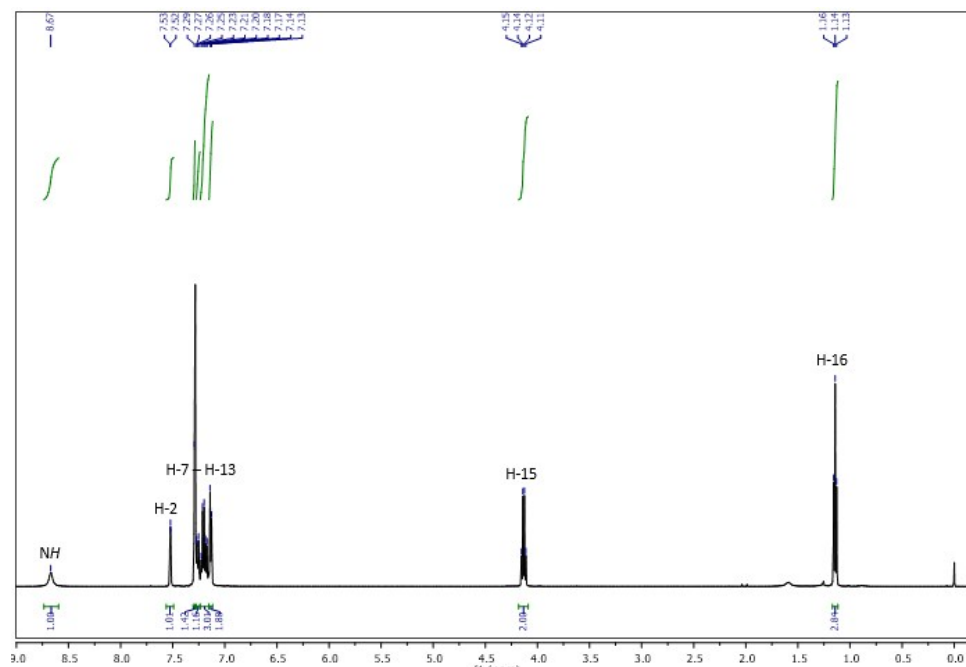

**4a** NMR <sup>1</sup>H (CDCl<sub>3</sub>, 500 MHz)

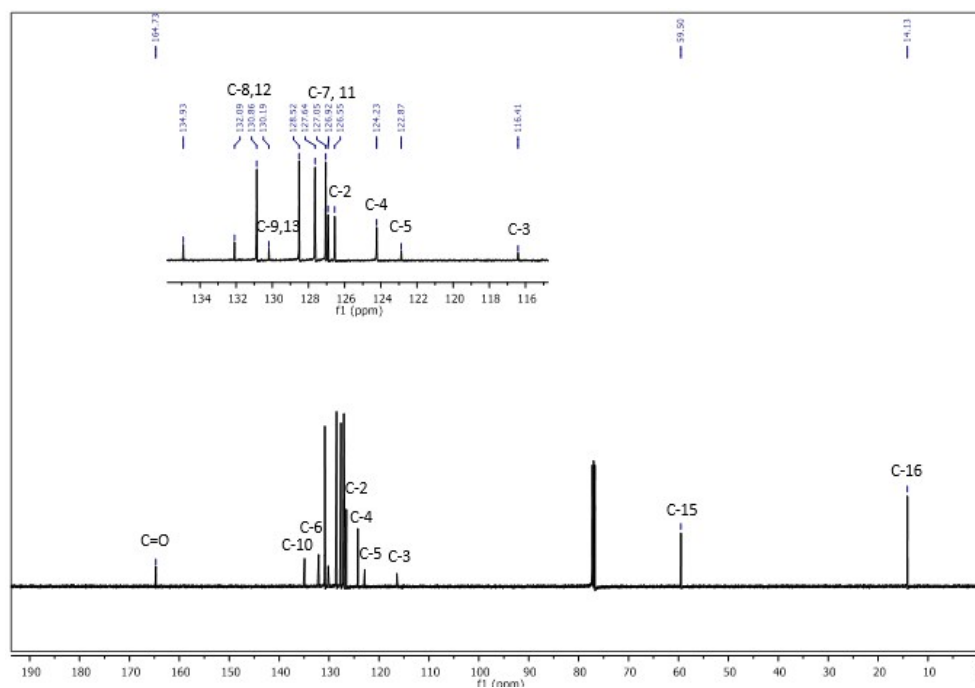

**4a NMR  $^{13}\text{C}$  ( $\text{CDCl}_3$ , 125 MHz)**

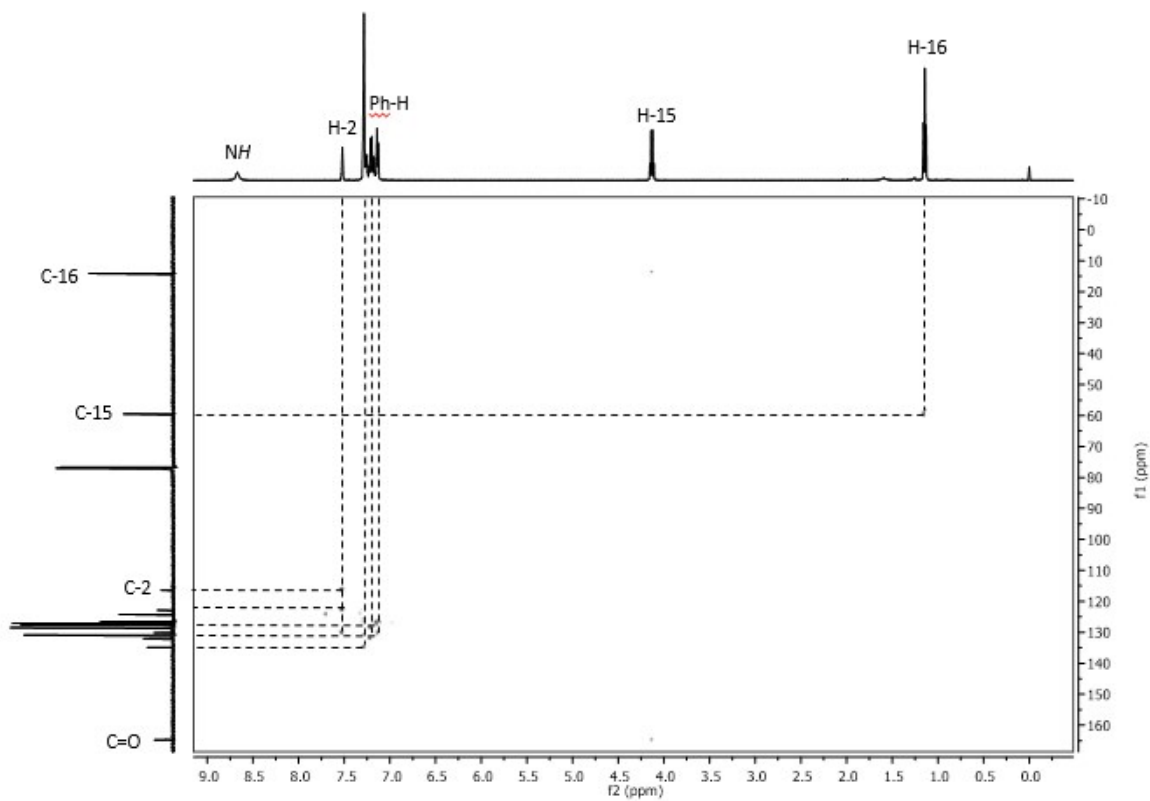

**4a NMR-HSQC ( $\text{CDCl}_3$ , 500 MHz)**

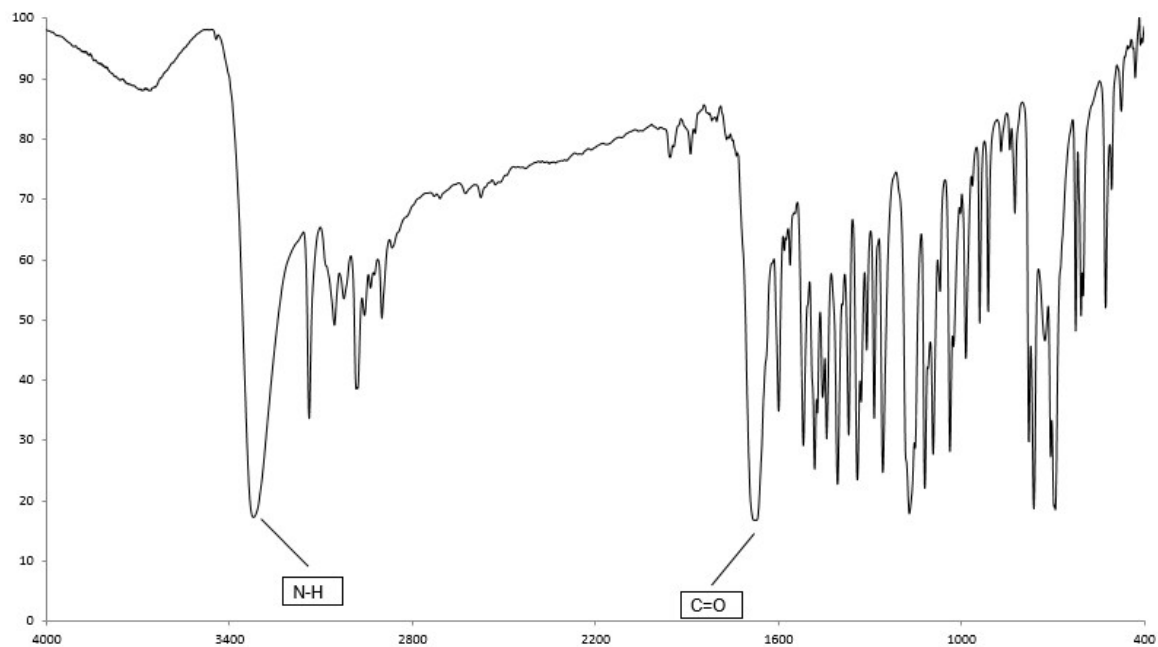

**4a, IR-KBr pellet.**

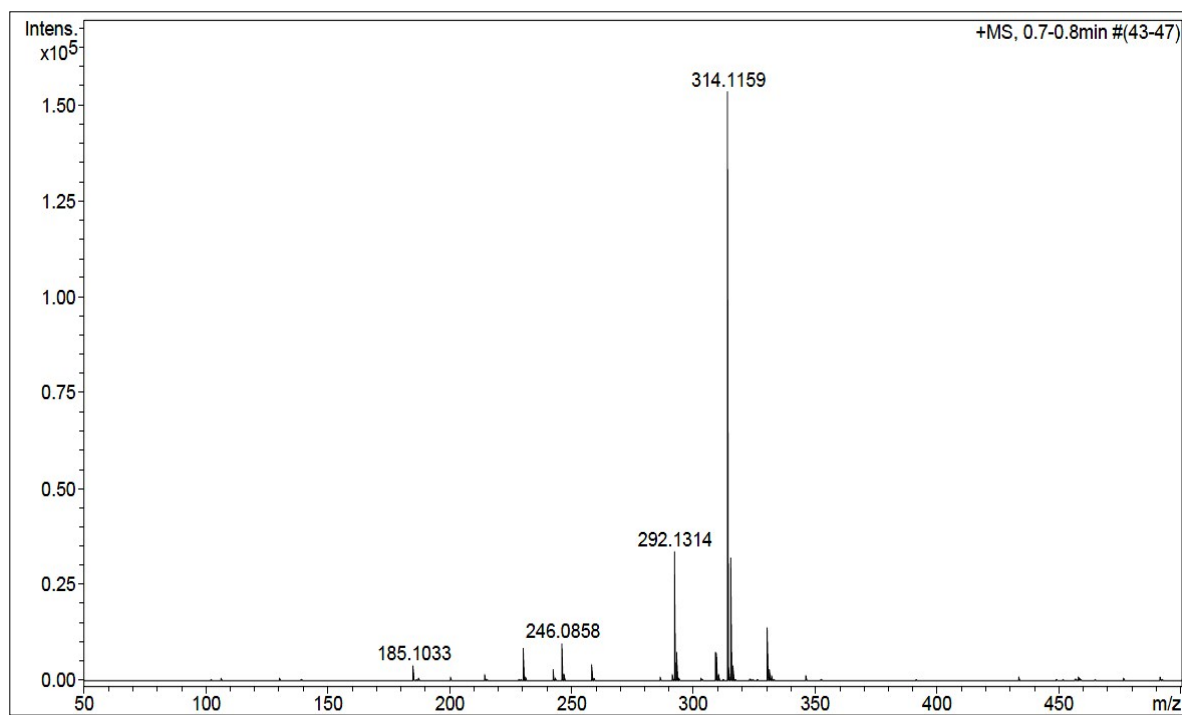

**4a, HRMS**

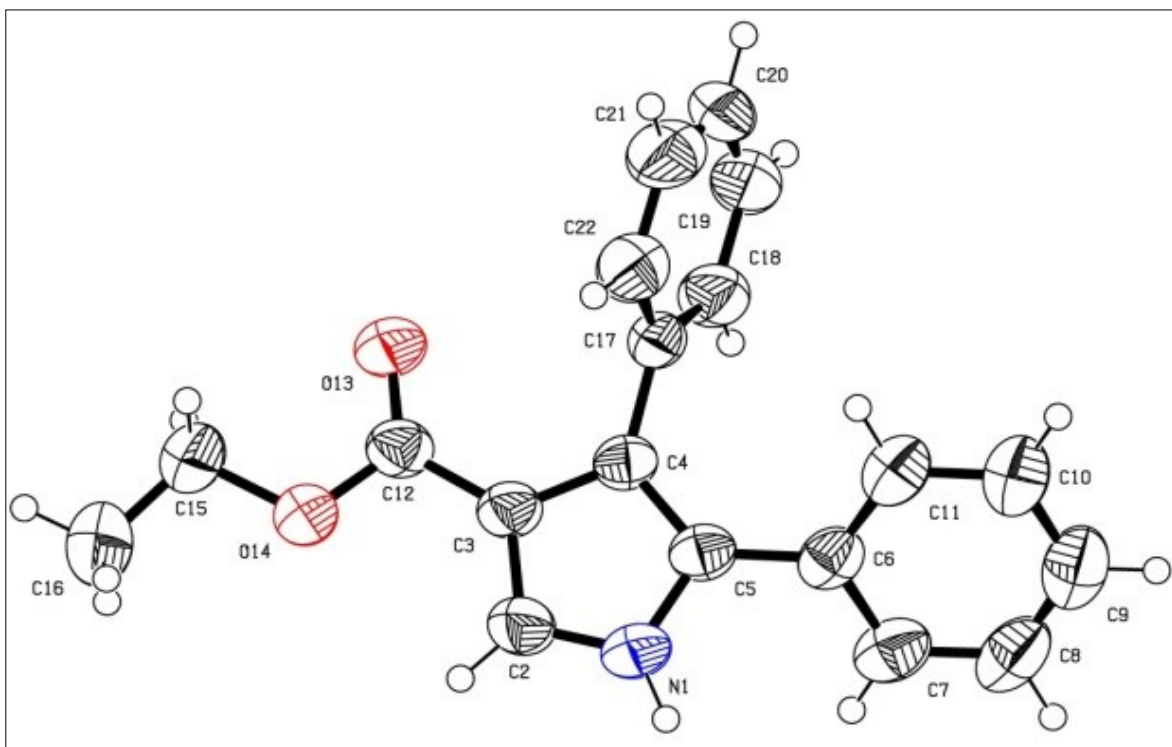

**4a, X-Ray Data CCDC 1912115**

Table 1. Crystal data and structure refinement for **4a**.

|                        |                                                  |          |
|------------------------|--------------------------------------------------|----------|
| Identification code    | <b>4a</b>                                        |          |
| Empirical formula      | C <sub>19</sub> H <sub>17</sub> N O <sub>2</sub> |          |
| Formula weight         | 291.34                                           |          |
| Temperature            | 298(2) K                                         |          |
| Wavelength             | 0.71073 Å                                        |          |
| Crystal system         | Orthorhombic                                     |          |
| Space group            | P 21 21 21                                       |          |
| Unit cell dimensions   | a = 5.7993(3) Å                                  | α = 90°. |
|                        | b = 13.4017(7) Å                                 | β = 90°. |
|                        | c = 20.2659(11) Å                                | γ = 90°. |
| Volume                 | 1575.08(14) Å <sup>3</sup>                       |          |
| Z                      | 4                                                |          |
| Density (calculated)   | 1.229 Mg/m <sup>3</sup>                          |          |
| Absorption coefficient | 0.080 mm <sup>-1</sup>                           |          |
| F(000)                 | 616                                              |          |

|                                   |                                             |
|-----------------------------------|---------------------------------------------|
| Theta range for data collection   | 3.65 to 26.05°.                             |
| Index ranges                      | -6<=h<=7, -10<=k<=16, -20<=l<=25            |
| Reflections collected             | 7871                                        |
| Independent reflections           | 3083 [R(int) = 0.0216]                      |
| Completeness to theta = 26.05°    | 99.7 %                                      |
| Refinement method                 | Full-matrix least-squares on F <sup>2</sup> |
| Data / restraints / parameters    | 3083 / 1 / 203                              |
| Goodness-of-fit on F <sup>2</sup> | 1.035                                       |
| Final R indices [I>2sigma(I)]     | R1 = 0.0400, wR2 = 0.0847                   |
| R indices (all data)              | R1 = 0.0585, wR2 = 0.0930                   |
| Absolute structure parameter      | -0.4(14)                                    |
| Largest diff. peak and hole       | 0.085 and -0.120 e.Å <sup>-3</sup>          |

Table 2. Atomic coordinates ( $\times 10^4$ ) and equivalent isotropic displacement parameters ( $\text{\AA}^2 \times 10^3$ ) for **4a**.  $U(\text{eq})$  is defined as one third of the trace of the orthogonalized  $U^{ij}$  tensor.

|       | x        | y        | z       | $U(\text{eq})$ |
|-------|----------|----------|---------|----------------|
| C(2)  | 5338(4)  | 1343(1)  | 7690(1) | 62(1)          |
| C(3)  | 4893(3)  | 378(1)   | 7499(1) | 54(1)          |
| C(4)  | 6371(3)  | 167(1)   | 6951(1) | 49(1)          |
| C(5)  | 7668(3)  | 1009(1)  | 6839(1) | 54(1)          |
| C(6)  | 9431(3)  | 1253(1)  | 6344(1) | 55(1)          |
| C(7)  | 11243(3) | 1896(1)  | 6489(1) | 68(1)          |
| C(8)  | 12892(3) | 2114(2)  | 6019(1) | 78(1)          |
| C(9)  | 12799(4) | 1699(2)  | 5405(1) | 80(1)          |
| C(10) | 11026(4) | 1064(2)  | 5254(1) | 76(1)          |
| C(11) | 9358(3)  | 842(2)   | 5712(1) | 64(1)          |
| C(12) | 3265(3)  | -295(1)  | 7811(1) | 56(1)          |
| C(15) | 237(4)   | -472(2)  | 8587(1) | 80(1)          |
| C(16) | -971(5)  | 126(2)   | 9090(1) | 99(1)          |
| C(17) | 6459(3)  | -768(1)  | 6563(1) | 49(1)          |
| C(18) | 8369(3)  | -1378(1) | 6577(1) | 68(1)          |
| C(19) | 8456(5)  | -2232(2) | 6199(1) | 90(1)          |
| C(20) | 6670(6)  | -2494(2) | 5809(1) | 93(1)          |
| C(21) | 4758(5)  | -1898(2) | 5786(1) | 90(1)          |
| C(22) | 4638(4)  | -1041(2) | 6165(1) | 69(1)          |
| O(13) | 3021(3)  | -1167(1) | 7677(1) | 75(1)          |
| O(14) | 1972(3)  | 149(1)   | 8273(1) | 74(1)          |
| N(1)  | 7004(3)  | 1709(1)  | 7303(1) | 63(1)          |



Table 3. Bond lengths [Å] and angles [°] for **4a**.

---

|              |          |
|--------------|----------|
| C(2)-N(1)    | 1.338(2) |
| C(2)-C(3)    | 1.374(3) |
| C(2)-H(2)    | 0.9300   |
| C(3)-C(4)    | 1.432(2) |
| C(3)-C(12)   | 1.450(3) |
| C(4)-C(5)    | 1.375(2) |
| C(4)-C(17)   | 1.480(2) |
| C(5)-N(1)    | 1.383(2) |
| C(5)-C(6)    | 1.468(2) |
| C(6)-C(7)    | 1.390(3) |
| C(6)-C(11)   | 1.396(3) |
| C(7)-C(8)    | 1.381(3) |
| C(7)-H(7)    | 0.9300   |
| C(8)-C(9)    | 1.364(3) |
| C(8)-H(8)    | 0.9300   |
| C(9)-C(10)   | 1.370(3) |
| C(9)-H(9)    | 0.9300   |
| C(10)-C(11)  | 1.372(3) |
| C(10)-H(10)  | 0.9300   |
| C(11)-H(11)  | 0.9300   |
| C(12)-O(13)  | 1.209(2) |
| C(12)-O(14)  | 1.338(2) |
| C(15)-O(14)  | 1.452(2) |
| C(15)-C(16)  | 1.475(3) |
| C(15)-H(15A) | 0.9700   |
| C(15)-H(15B) | 0.9700   |
| C(16)-H(16A) | 0.9600   |
| C(16)-H(16B) | 0.9600   |
| C(16)-H(16C) | 0.9600   |
| C(17)-C(18)  | 1.377(2) |
| C(17)-C(22)  | 1.379(3) |
| C(18)-C(19)  | 1.378(3) |
| C(18)-H(18)  | 0.9300   |
| C(19)-C(20)  | 1.350(4) |

|             |           |
|-------------|-----------|
| C(19)-H(19) | 0.9300    |
| C(20)-C(21) | 1.368(4)  |
| C(20)-H(20) | 0.9300    |
| C(21)-C(22) | 1.384(3)  |
| C(21)-H(21) | 0.9300    |
| C(22)-H(22) | 0.9300    |
| N(1)-H(1F)  | 0.883(15) |

|                   |            |
|-------------------|------------|
| N(1)-C(2)-C(3)    | 108.40(17) |
| N(1)-C(2)-H(2)    | 125.8      |
| C(3)-C(2)-H(2)    | 125.8      |
| C(2)-C(3)-C(4)    | 106.97(16) |
| C(2)-C(3)-C(12)   | 125.79(17) |
| C(4)-C(3)-C(12)   | 127.23(16) |
| C(5)-C(4)-C(3)    | 107.12(15) |
| C(5)-C(4)-C(17)   | 125.96(16) |
| C(3)-C(4)-C(17)   | 126.90(15) |
| C(4)-C(5)-N(1)    | 106.92(15) |
| C(4)-C(5)-C(6)    | 132.58(16) |
| N(1)-C(5)-C(6)    | 120.49(15) |
| C(7)-C(6)-C(11)   | 117.44(18) |
| C(7)-C(6)-C(5)    | 121.36(17) |
| C(11)-C(6)-C(5)   | 121.20(16) |
| C(8)-C(7)-C(6)    | 120.6(2)   |
| C(8)-C(7)-H(7)    | 119.7      |
| C(6)-C(7)-H(7)    | 119.7      |
| C(9)-C(8)-C(7)    | 121.0(2)   |
| C(9)-C(8)-H(8)    | 119.5      |
| C(7)-C(8)-H(8)    | 119.5      |
| C(8)-C(9)-C(10)   | 119.1(2)   |
| C(8)-C(9)-H(9)    | 120.4      |
| C(10)-C(9)-H(9)   | 120.4      |
| C(9)-C(10)-C(11)  | 120.9(2)   |
| C(9)-C(10)-H(10)  | 119.6      |
| C(11)-C(10)-H(10) | 119.6      |
| C(10)-C(11)-C(6)  | 120.91(19) |

|                     |            |
|---------------------|------------|
| C(10)-C(11)-H(11)   | 119.5      |
| C(6)-C(11)-H(11)    | 119.5      |
| O(13)-C(12)-O(14)   | 121.43(17) |
| O(13)-C(12)-C(3)    | 125.42(17) |
| O(14)-C(12)-C(3)    | 113.14(15) |
| O(14)-C(15)-C(16)   | 108.72(18) |
| O(14)-C(15)-H(15A)  | 109.9      |
| C(16)-C(15)-H(15A)  | 109.9      |
| O(14)-C(15)-H(15B)  | 109.9      |
| C(16)-C(15)-H(15B)  | 109.9      |
| H(15A)-C(15)-H(15B) | 108.3      |
| C(15)-C(16)-H(16A)  | 109.5      |
| C(15)-C(16)-H(16B)  | 109.5      |
| H(16A)-C(16)-H(16B) | 109.5      |
| C(15)-C(16)-H(16C)  | 109.5      |
| H(16A)-C(16)-H(16C) | 109.5      |
| H(16B)-C(16)-H(16C) | 109.5      |
| C(18)-C(17)-C(22)   | 118.08(17) |
| C(18)-C(17)-C(4)    | 121.29(16) |
| C(22)-C(17)-C(4)    | 120.61(17) |
| C(17)-C(18)-C(19)   | 120.7(2)   |
| C(17)-C(18)-H(18)   | 119.6      |
| C(19)-C(18)-H(18)   | 119.6      |
| C(20)-C(19)-C(18)   | 121.0(2)   |
| C(20)-C(19)-H(19)   | 119.5      |
| C(18)-C(19)-H(19)   | 119.5      |
| C(19)-C(20)-C(21)   | 119.3(2)   |
| C(19)-C(20)-H(20)   | 120.3      |
| C(21)-C(20)-H(20)   | 120.3      |
| C(20)-C(21)-C(22)   | 120.5(2)   |
| C(20)-C(21)-H(21)   | 119.8      |
| C(22)-C(21)-H(21)   | 119.8      |
| C(17)-C(22)-C(21)   | 120.5(2)   |
| C(17)-C(22)-H(22)   | 119.8      |
| C(21)-C(22)-H(22)   | 119.8      |
| C(12)-O(14)-C(15)   | 116.10(15) |

|                 |            |
|-----------------|------------|
| C(2)-N(1)-C(5)  | 110.57(15) |
| C(2)-N(1)-H(1F) | 125.6(14)  |
| C(5)-N(1)-H(1F) | 123.2(14)  |

---

Symmetry transformations used to generate equivalent atoms:

Table 4. Anisotropic displacement parameters ( $\text{\AA}^2 \times 10^3$ ) for **4a**. The anisotropic displacement factor exponent takes the form:  $-2\pi^2 [ h^2 a^{*2} U^{11} + \dots + 2 h k a^* b^* U^{12} ]$

|       | U <sup>11</sup> | U <sup>22</sup> | U <sup>33</sup> | U <sup>23</sup> | U <sup>13</sup> | U <sup>12</sup> |
|-------|-----------------|-----------------|-----------------|-----------------|-----------------|-----------------|
| C(2)  | 79(1)           | 46(1)           | 63(1)           | -4(1)           | 9(1)            | 1(1)            |
| C(3)  | 65(1)           | 40(1)           | 57(1)           | 2(1)            | 2(1)            | 1(1)            |
| C(4)  | 55(1)           | 37(1)           | 54(1)           | 3(1)            | -2(1)           | 2(1)            |
| C(5)  | 59(1)           | 41(1)           | 61(1)           | 2(1)            | -2(1)           | 2(1)            |
| C(6)  | 52(1)           | 41(1)           | 70(1)           | 12(1)           | -2(1)           | 4(1)            |
| C(7)  | 62(1)           | 52(1)           | 90(1)           | 4(1)            | -9(1)           | -2(1)           |
| C(8)  | 53(1)           | 62(1)           | 120(2)          | 17(1)           | 2(1)            | -7(1)           |
| C(9)  | 64(1)           | 79(2)           | 97(2)           | 22(1)           | 15(1)           | 3(1)            |
| C(10) | 69(1)           | 84(2)           | 75(1)           | 16(1)           | 7(1)            | -4(1)           |
| C(11) | 58(1)           | 63(1)           | 72(1)           | 14(1)           | -4(1)           | -6(1)           |
| C(12) | 70(1)           | 44(1)           | 54(1)           | 2(1)            | -1(1)           | 3(1)            |
| C(15) | 94(2)           | 72(1)           | 75(1)           | 2(1)            | 21(1)           | -23(1)          |
| C(16) | 101(2)          | 99(2)           | 97(2)           | 5(1)            | 35(2)           | -14(2)          |
| C(17) | 57(1)           | 43(1)           | 47(1)           | 4(1)            | 3(1)            | -4(1)           |
| C(18) | 63(1)           | 53(1)           | 88(1)           | -5(1)           | 5(1)            | 5(1)            |
| C(19) | 95(2)           | 54(1)           | 120(2)          | -16(1)          | 40(2)           | 0(1)            |
| C(20) | 139(2)          | 68(2)           | 71(1)           | -24(1)          | 45(2)           | -26(2)          |
| C(21) | 124(2)          | 93(2)           | 53(1)           | -7(1)           | -6(1)           | -40(2)          |
| C(22) | 75(1)           | 71(1)           | 61(1)           | 3(1)            | -7(1)           | -7(1)           |
| O(13) | 102(1)          | 42(1)           | 83(1)           | 0(1)            | 19(1)           | -8(1)           |
| O(14) | 90(1)           | 54(1)           | 77(1)           | -6(1)           | 26(1)           | -12(1)          |
| N(1)  | 77(1)           | 39(1)           | 73(1)           | -2(1)           | 5(1)            | -6(1)           |

---

## Compound 4b

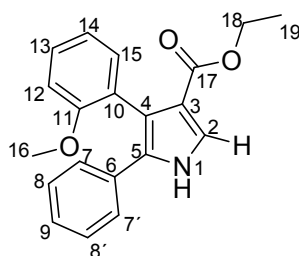

### Ethyl 4-(2-methoxyphenyl)-5-phenyl-1H-pyrrole-3-carboxylate (4b). CCDC 1912414

Yield: 80%; colorless crystals; mp: 171-172 °C. IR ( $\nu$   $\text{cm}^{-1}$ ) 3281 (N-H), 1692 (C=O).  $^1\text{H}$  NMR (500 MHz,  $\text{CDCl}_3$ )  $\delta$ : 8.68 (s, 1H, H-1), 7.52 (d,  $^3J_{\text{H-H}} = 3.0$  Hz, 1H, H-2), 7.27-7.09 (m, 7H, CH Ar), 6.91-6.86 (m, 2H, CH Ar) 4.10 (q,  $^3J_{\text{H-H}} = 7.0$  Hz, 2H, H-18), 3.61 (s, 3H, H-16) 1.09 (t,  $^3J_{\text{H-H}} = 7.0$  Hz, 3H, H-19).  $^{13}\text{C}$  NMR (125 MHz,  $\text{CDCl}_3$ )  $\delta$ : 164.7 (C-17), 157.9 (C-11), 132.4 (C-6), 132.0 (C-15), 130.1 (C-13), 128.4 (C-8), 128.3 (C-9), 126.7 (C-10), 126.3 (C-7), 124.3 (C-3), 123.9 (C-14), 120.2 (C-12), 118.6 (C-4), 117.3 (C-5), 110.7 (C-2), 59.3 (C-18), 55.4 (C-16), 14.1 (C-19). HRMS (ESI $^+$ ):  $m/z$  calcd for  $\text{C}_{20}\text{H}_{19}\text{NO}_3$   $[\text{M}+\text{Na}]^+$  344.1263, found 344.1269.

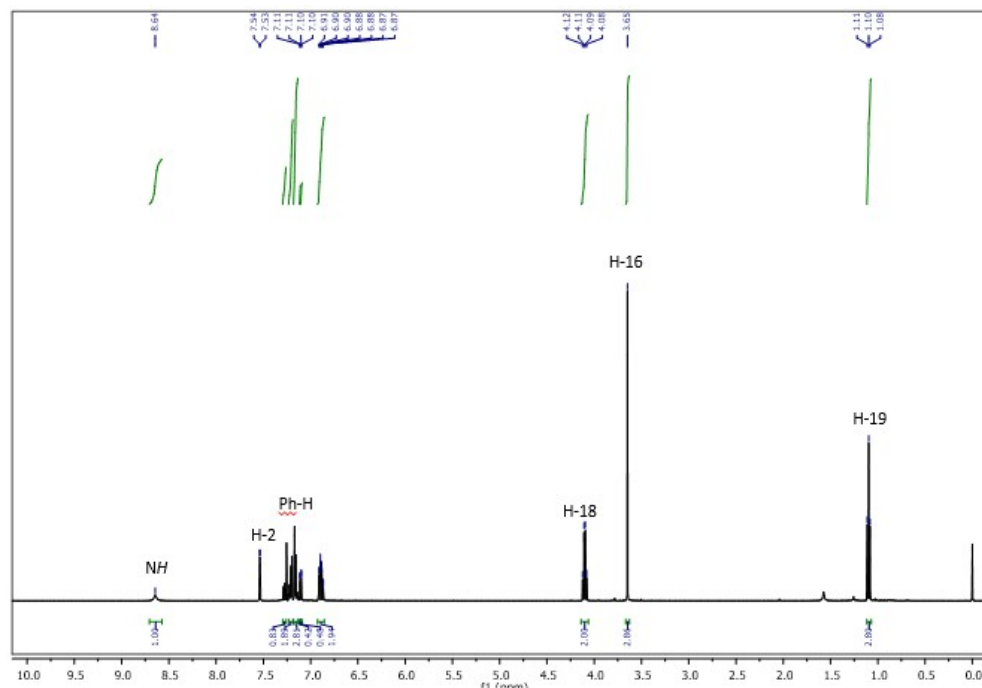

4b NMR  $^1\text{H}$  ( $\text{CDCl}_3$ , 500 MHz).

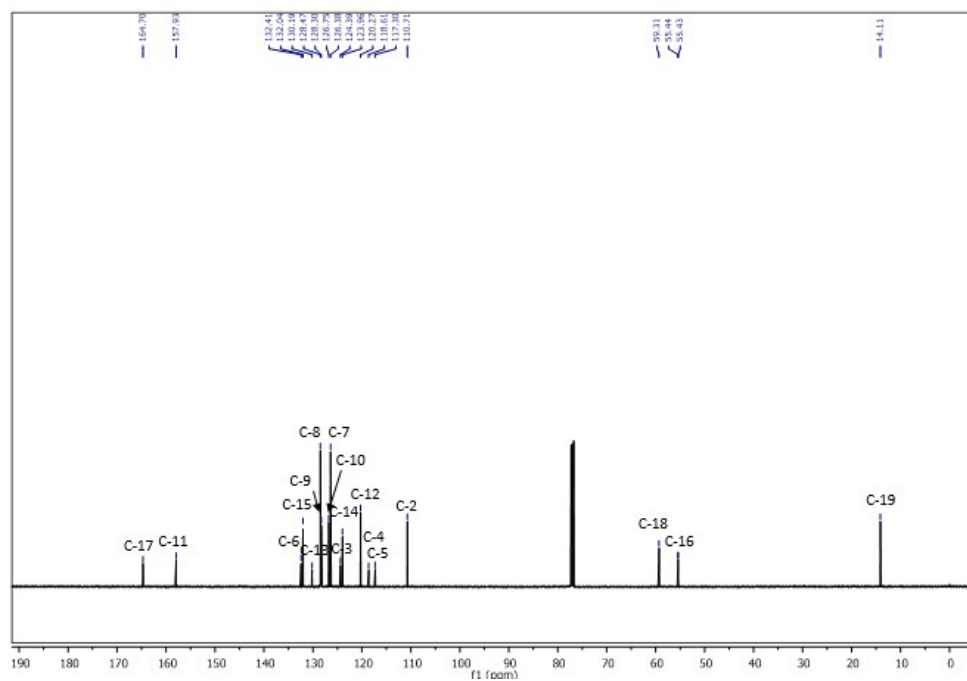

**4b NMR  $^{13}\text{C}$  ( $\text{CDCl}_3$ , 125 MHz).**

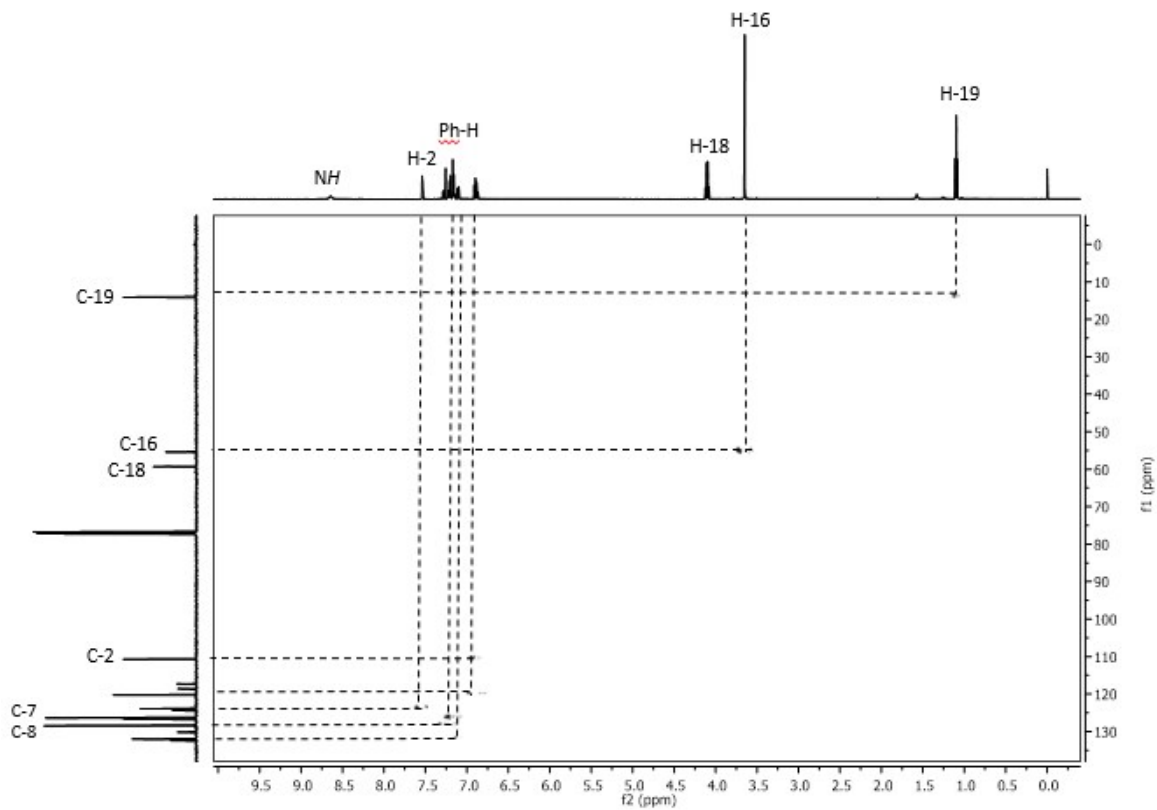

**4b NMR-HSQC ( $\text{CDCl}_3$ , 500 MHz).**

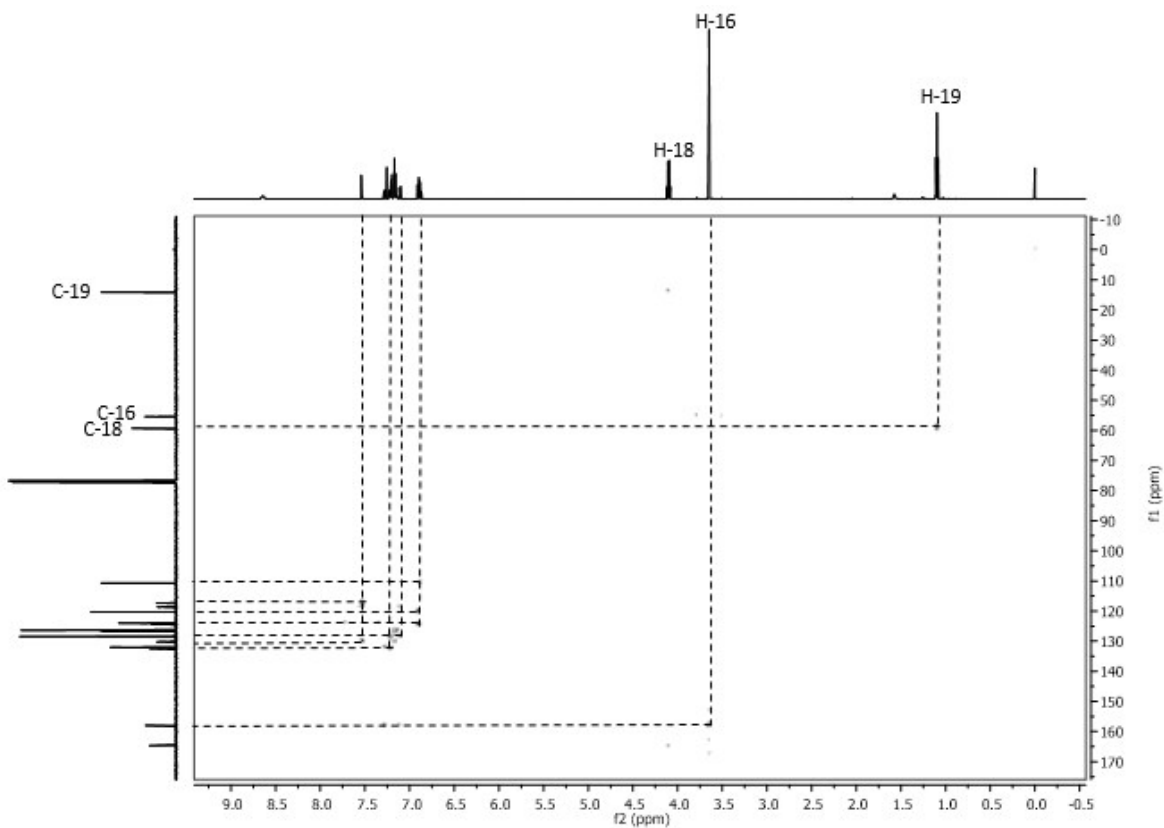

**4b NMR-HMBC (CDCl<sub>3</sub>, 500 MHz).**

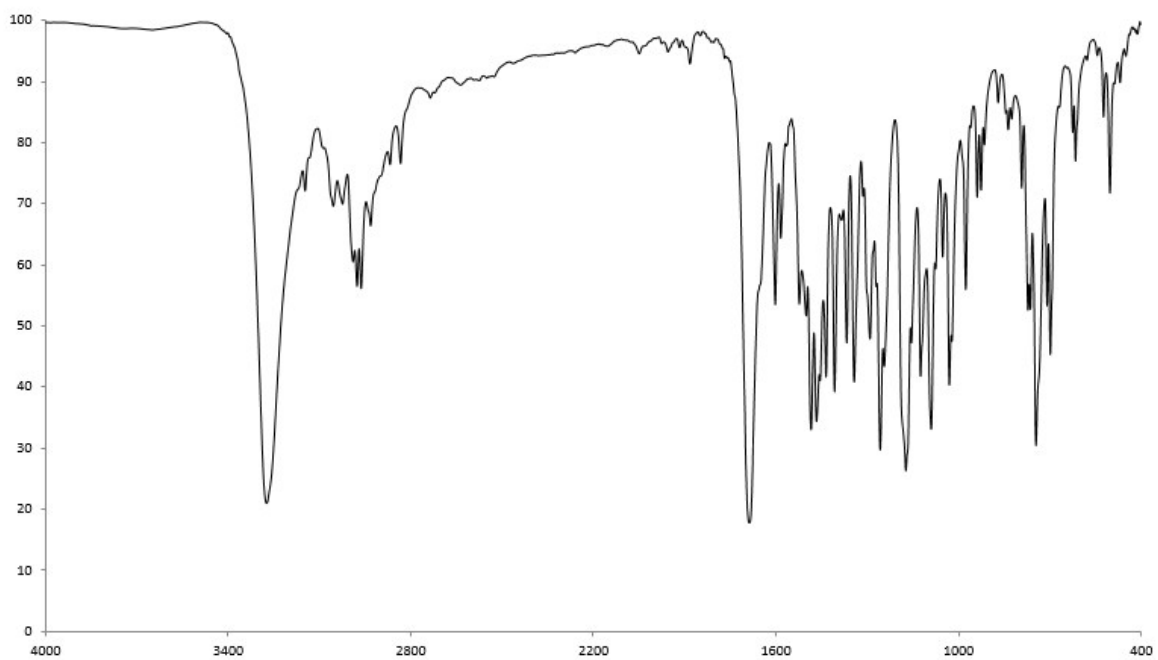

**4b IR-KBr pellet.**

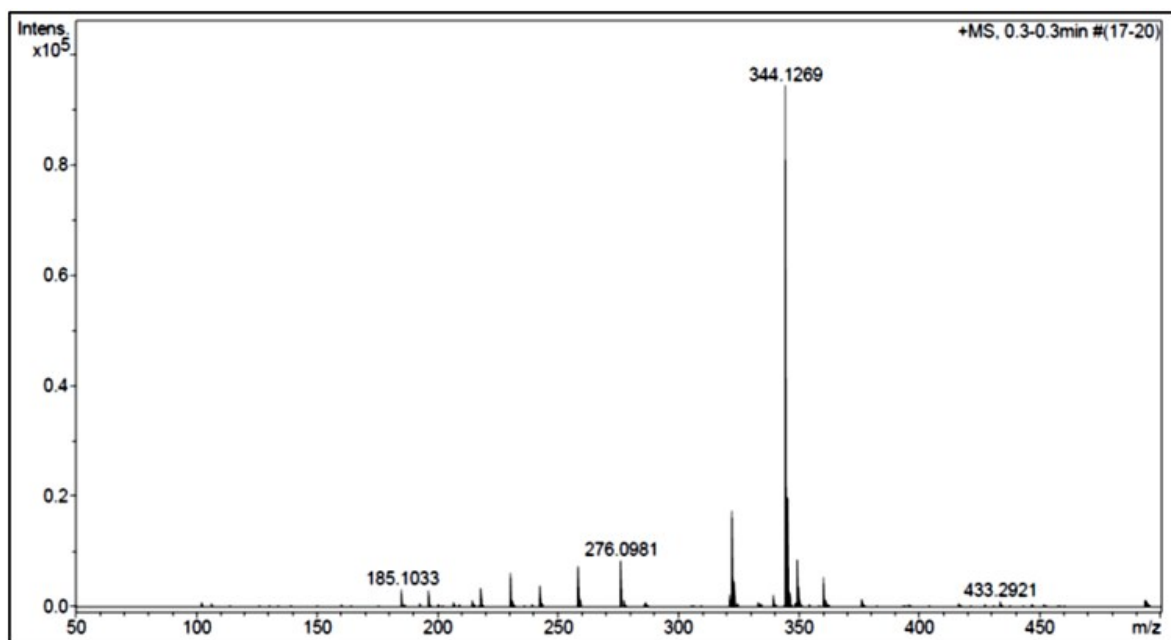

4b HRMS

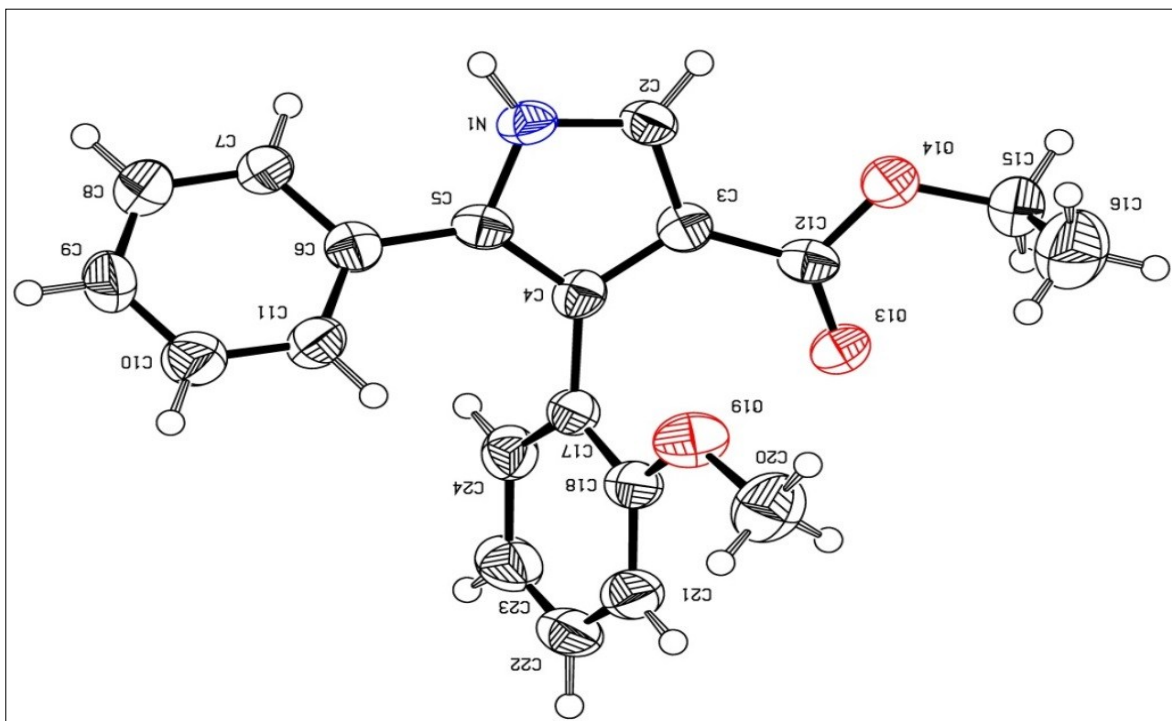

4b, X-Ray Data CCDC 1912414



Table 1. Crystal data and structure refinement for **4b**.

|                                   |                                                                 |          |
|-----------------------------------|-----------------------------------------------------------------|----------|
| Identification code               | <b>4b</b>                                                       |          |
| Empirical formula                 | C <sub>20</sub> H <sub>19</sub> N O <sub>3</sub> S <sub>0</sub> |          |
| Formula weight                    | 321.36                                                          |          |
| Temperature                       | 298(2) K                                                        |          |
| Wavelength                        | 0.71073 Å                                                       |          |
| Crystal system                    | Orthorhombic                                                    |          |
| Space group                       | P na21                                                          |          |
| Unit cell dimensions              | a = 20.686(3) Å                                                 | α = 90°. |
|                                   | b = 10.2939(12) Å                                               | β = 90°. |
|                                   | c = 7.9226(13) Å                                                | γ = 90°. |
| Volume                            | 1687.0(4) Å <sup>3</sup>                                        |          |
| Z                                 | 4                                                               |          |
| Density (calculated)              | 1.265 Mg/m <sup>3</sup>                                         |          |
| Absorption coefficient            | 0.085 mm <sup>-1</sup>                                          |          |
| F(000)                            | 680                                                             |          |
| Theta range for data collection   | 3.39 to 25.34°.                                                 |          |
| Index ranges                      | -24 ≤ h ≤ 24, -9 ≤ k ≤ 12, -5 ≤ l ≤ 9                           |          |
| Reflections collected             | 4470                                                            |          |
| Independent reflections           | 2543 [R(int) = 0.0532]                                          |          |
| Completeness to theta = 25.34°    | 99.6 %                                                          |          |
| Refinement method                 | Full-matrix least-squares on F <sup>2</sup>                     |          |
| Data / restraints / parameters    | 2543 / 2 / 222                                                  |          |
| Goodness-of-fit on F <sup>2</sup> | 1.028                                                           |          |
| Final R indices [I > 2σ(I)]       | R1 = 0.0588, wR2 = 0.1118                                       |          |
| R indices (all data)              | R1 = 0.1094, wR2 = 0.1356                                       |          |
| Absolute structure parameter      | -1(2)                                                           |          |
| Largest diff. peak and hole       | 0.177 and -0.216 e.Å <sup>-3</sup>                              |          |

Table 2. Atomic coordinates ( $\times 10^4$ ) and equivalent isotropic displacement parameters ( $\text{\AA}^2 \times 10^3$ ) for **4b**.  $U(\text{eq})$  is defined as one third of the trace of the orthogonalized  $U^{ij}$  tensor.

|       | x        | y        | z        | $U(\text{eq})$ |
|-------|----------|----------|----------|----------------|
| C(2)  | -7337(2) | -7150(4) | -2963(6) | 39(1)          |
| C(3)  | -7241(2) | -5894(4) | -3521(6) | 36(1)          |
| C(4)  | -7762(2) | -5123(4) | -2903(6) | 36(1)          |
| C(5)  | -8162(2) | -5952(4) | -2004(6) | 38(1)          |
| C(6)  | -8751(2) | -5745(4) | -1013(6) | 38(1)          |
| C(7)  | -9214(2) | -6716(4) | -832(6)  | 44(1)          |
| C(8)  | -9754(2) | -6526(5) | 185(7)   | 59(2)          |
| C(9)  | -9830(2) | -5379(5) | 1048(7)  | 61(2)          |
| C(10) | -9383(2) | -4409(5) | 879(7)   | 56(1)          |
| C(11) | -8843(2) | -4578(4) | -151(6)  | 45(1)          |
| C(12) | -6698(2) | -5458(4) | -4528(6) | 38(1)          |
| C(15) | -5663(2) | -6044(5) | -5611(7) | 55(1)          |
| C(16) | -5166(2) | -5454(6) | -4475(9) | 87(2)          |
| C(17) | -7872(2) | -3718(4) | -3210(6) | 39(1)          |
| C(18) | -7440(2) | -2786(4) | -2604(6) | 42(1)          |
| C(20) | -6439(2) | -2381(5) | -1201(8) | 71(2)          |
| C(21) | -7530(2) | -1481(4) | -2967(7) | 53(1)          |
| C(22) | -8055(3) | -1097(5) | -3930(7) | 57(2)          |
| C(23) | -8490(2) | -1986(5) | -4524(7) | 60(2)          |
| C(24) | -8403(2) | -3302(4) | -4162(6) | 45(1)          |
| O(13) | -6642(1) | -4410(3) | -5206(4) | 47(1)          |
| O(14) | -6232(1) | -6372(3) | -4659(4) | 49(1)          |
| O(19) | -6945(2) | -3254(3) | -1652(4) | 55(1)          |
| N(1)  | -7895(2) | -7186(3) | -2078(5) | 39(1)          |

Table 3. Bond lengths [ $\text{\AA}$ ] and angles [ $^\circ$ ] for **4b**.

---

|              |          |
|--------------|----------|
| C(2)-N(1)    | 1.350(5) |
| C(2)-C(3)    | 1.381(6) |
| C(2)-H(2)    | 0.9300   |
| C(3)-C(4)    | 1.426(6) |
| C(3)-C(12)   | 1.449(6) |
| C(4)-C(5)    | 1.386(6) |
| C(4)-C(17)   | 1.484(5) |
| C(5)-N(1)    | 1.387(5) |
| C(5)-C(6)    | 1.464(6) |
| C(6)-C(7)    | 1.392(6) |
| C(6)-C(11)   | 1.395(6) |
| C(7)-C(8)    | 1.391(6) |
| C(7)-H(7)    | 0.9300   |
| C(8)-C(9)    | 1.373(6) |
| C(8)-H(8)    | 0.9300   |
| C(9)-C(10)   | 1.366(6) |
| C(9)-H(9)    | 0.9300   |
| C(10)-C(11)  | 1.395(6) |
| C(10)-H(10)  | 0.9300   |
| C(11)-H(11)  | 0.9300   |
| C(12)-O(13)  | 1.211(5) |
| C(12)-O(14)  | 1.351(5) |
| C(15)-O(14)  | 1.437(5) |
| C(15)-C(16)  | 1.496(7) |
| C(15)-H(15A) | 0.9700   |
| C(15)-H(15B) | 0.9700   |
| C(16)-H(16A) | 0.9600   |
| C(16)-H(16B) | 0.9600   |
| C(16)-H(16C) | 0.9600   |
| C(17)-C(18)  | 1.396(6) |
| C(17)-C(24)  | 1.400(6) |
| C(18)-O(19)  | 1.361(5) |
| C(18)-C(21)  | 1.386(6) |
| C(20)-O(19)  | 1.425(5) |

|                 |           |
|-----------------|-----------|
| C(20)-H(20A)    | 0.9600    |
| C(20)-H(20B)    | 0.9600    |
| C(20)-H(20C)    | 0.9600    |
| C(21)-C(22)     | 1.386(7)  |
| C(21)-H(21)     | 0.9300    |
| C(22)-C(23)     | 1.367(7)  |
| C(22)-H(22)     | 0.9300    |
| C(23)-C(24)     | 1.396(6)  |
| C(23)-H(23)     | 0.9300    |
| C(24)-H(24)     | 0.9300    |
| N(1)-H(1F)      | 0.906(19) |
|                 |           |
| N(1)-C(2)-C(3)  | 108.4(4)  |
| N(1)-C(2)-H(2)  | 125.8     |
| C(3)-C(2)-H(2)  | 125.8     |
| C(2)-C(3)-C(4)  | 107.6(4)  |
| C(2)-C(3)-C(12) | 125.3(4)  |
| C(4)-C(3)-C(12) | 127.1(4)  |
| C(5)-C(4)-C(3)  | 106.6(3)  |
| C(5)-C(4)-C(17) | 126.4(4)  |
| C(3)-C(4)-C(17) | 127.0(4)  |
| C(4)-C(5)-N(1)  | 107.7(4)  |
| C(4)-C(5)-C(6)  | 133.0(4)  |
| N(1)-C(5)-C(6)  | 119.2(4)  |
| C(7)-C(6)-C(11) | 118.3(4)  |
| C(7)-C(6)-C(5)  | 121.5(4)  |
| C(11)-C(6)-C(5) | 120.1(4)  |
| C(8)-C(7)-C(6)  | 120.8(4)  |
| C(8)-C(7)-H(7)  | 119.6     |
| C(6)-C(7)-H(7)  | 119.6     |
| C(9)-C(8)-C(7)  | 120.0(5)  |
| C(9)-C(8)-H(8)  | 120.0     |
| C(7)-C(8)-H(8)  | 120.0     |
| C(10)-C(9)-C(8) | 120.2(5)  |
| C(10)-C(9)-H(9) | 119.9     |
| C(8)-C(9)-H(9)  | 119.9     |

|                     |          |
|---------------------|----------|
| C(9)-C(10)-C(11)    | 120.5(5) |
| C(9)-C(10)-H(10)    | 119.8    |
| C(11)-C(10)-H(10)   | 119.8    |
| C(6)-C(11)-C(10)    | 120.2(4) |
| C(6)-C(11)-H(11)    | 119.9    |
| C(10)-C(11)-H(11)   | 119.9    |
| O(13)-C(12)-O(14)   | 121.2(4) |
| O(13)-C(12)-C(3)    | 126.5(4) |
| O(14)-C(12)-C(3)    | 112.3(4) |
| O(14)-C(15)-C(16)   | 110.0(5) |
| O(14)-C(15)-H(15A)  | 109.7    |
| C(16)-C(15)-H(15A)  | 109.7    |
| O(14)-C(15)-H(15B)  | 109.7    |
| C(16)-C(15)-H(15B)  | 109.7    |
| H(15A)-C(15)-H(15B) | 108.2    |
| C(15)-C(16)-H(16A)  | 109.5    |
| C(15)-C(16)-H(16B)  | 109.5    |
| H(16A)-C(16)-H(16B) | 109.5    |
| C(15)-C(16)-H(16C)  | 109.5    |
| H(16A)-C(16)-H(16C) | 109.5    |
| H(16B)-C(16)-H(16C) | 109.5    |
| C(18)-C(17)-C(24)   | 118.5(4) |
| C(18)-C(17)-C(4)    | 121.1(4) |
| C(24)-C(17)-C(4)    | 120.4(4) |
| O(19)-C(18)-C(21)   | 123.9(4) |
| O(19)-C(18)-C(17)   | 115.4(4) |
| C(21)-C(18)-C(17)   | 120.7(4) |
| O(19)-C(20)-H(20A)  | 109.5    |
| O(19)-C(20)-H(20B)  | 109.5    |
| H(20A)-C(20)-H(20B) | 109.5    |
| O(19)-C(20)-H(20C)  | 109.5    |
| H(20A)-C(20)-H(20C) | 109.5    |
| H(20B)-C(20)-H(20C) | 109.5    |
| C(18)-C(21)-C(22)   | 119.7(5) |
| C(18)-C(21)-H(21)   | 120.2    |
| C(22)-C(21)-H(21)   | 120.2    |

|                   |          |
|-------------------|----------|
| C(23)-C(22)-C(21) | 120.9(4) |
| C(23)-C(22)-H(22) | 119.5    |
| C(21)-C(22)-H(22) | 119.5    |
| C(22)-C(23)-C(24) | 119.7(5) |
| C(22)-C(23)-H(23) | 120.2    |
| C(24)-C(23)-H(23) | 120.2    |
| C(23)-C(24)-C(17) | 120.5(4) |
| C(23)-C(24)-H(24) | 119.7    |
| C(17)-C(24)-H(24) | 119.7    |
| C(12)-O(14)-C(15) | 117.4(3) |
| C(18)-O(19)-C(20) | 118.0(4) |
| C(2)-N(1)-C(5)    | 109.7(4) |
| C(2)-N(1)-H(1F)   | 125(3)   |
| C(5)-N(1)-H(1F)   | 125(3)   |

---

Symmetry transformations used to generate equivalent atoms:

Table 4. Anisotropic displacement parameters ( $\text{\AA}^2 \times 10^3$ ) for **4b**. The anisotropic displacement factor exponent takes the form:  $-2\pi^2 [ h^2 a^{*2} U^{11} + \dots + 2 h k a^* b^* U^{12} ]$

|       | U <sup>11</sup> | U <sup>22</sup> | U <sup>33</sup> | U <sup>23</sup> | U <sup>13</sup> | U <sup>12</sup> |
|-------|-----------------|-----------------|-----------------|-----------------|-----------------|-----------------|
| C(2)  | 47(3)           | 33(2)           | 38(3)           | -1(2)           | 4(2)            | 6(2)            |
| C(3)  | 40(2)           | 40(2)           | 28(3)           | 7(2)            | -1(2)           | 2(2)            |
| C(4)  | 40(2)           | 39(2)           | 29(3)           | 7(2)            | 0(2)            | -1(2)           |
| C(5)  | 47(3)           | 32(2)           | 33(3)           | -2(2)           | -4(2)           | 4(2)            |
| C(6)  | 41(3)           | 42(3)           | 32(3)           | 7(2)            | -3(2)           | 4(2)            |
| C(7)  | 40(2)           | 37(2)           | 54(4)           | 5(2)            | 1(2)            | -3(2)           |
| C(8)  | 49(3)           | 51(3)           | 78(4)           | 10(3)           | 10(3)           | -3(2)           |
| C(9)  | 51(3)           | 63(3)           | 69(4)           | 9(3)            | 23(3)           | 8(3)            |
| C(10) | 66(3)           | 47(3)           | 55(4)           | -4(3)           | 12(3)           | -3(3)           |
| C(11) | 49(3)           | 43(3)           | 45(3)           | -1(2)           | 4(3)            | -8(2)           |
| C(12) | 49(3)           | 31(2)           | 35(3)           | -3(2)           | -2(2)           | 4(2)            |
| C(15) | 44(3)           | 58(3)           | 64(4)           | 3(3)            | 8(3)            | -2(2)           |
| C(16) | 66(4)           | 100(4)          | 94(6)           | -5(4)           | -1(4)           | -15(3)          |
| C(17) | 45(3)           | 35(2)           | 36(3)           | 5(2)            | 11(2)           | 3(2)            |
| C(18) | 54(3)           | 37(3)           | 35(3)           | 2(2)            | 9(2)            | 3(2)            |
| C(20) | 66(3)           | 76(4)           | 71(4)           | -7(3)           | -7(3)           | -17(3)          |
| C(21) | 68(3)           | 39(3)           | 50(4)           | -3(3)           | 19(3)           | -1(3)           |
| C(22) | 82(4)           | 40(3)           | 49(4)           | 12(3)           | 29(3)           | 17(3)           |
| C(23) | 67(3)           | 53(3)           | 59(4)           | 17(3)           | 11(3)           | 17(3)           |
| C(24) | 42(3)           | 50(3)           | 44(3)           | 6(2)            | 3(2)            | 2(2)            |
| O(13) | 52(2)           | 41(2)           | 49(2)           | 14(2)           | 8(2)            | -1(1)           |
| O(14) | 50(2)           | 43(2)           | 53(2)           | 11(2)           | 12(2)           | 4(2)            |
| O(19) | 66(2)           | 48(2)           | 52(3)           | -2(2)           | -12(2)          | -5(2)           |
| N(1)  | 50(2)           | 31(2)           | 36(2)           | 5(2)            | 2(2)            | -2(2)           |

Table 5. Torsion angles [°] for **4b**.

---

|                         |           |
|-------------------------|-----------|
| N(1)-C(2)-C(3)-C(4)     | 1.4(5)    |
| N(1)-C(2)-C(3)-C(12)    | -179.5(4) |
| C(2)-C(3)-C(4)-C(5)     | -0.7(5)   |
| C(12)-C(3)-C(4)-C(5)    | -179.7(4) |
| C(2)-C(3)-C(4)-C(17)    | -178.7(5) |
| C(12)-C(3)-C(4)-C(17)   | 2.3(7)    |
| C(3)-C(4)-C(5)-N(1)     | -0.3(5)   |
| C(17)-C(4)-C(5)-N(1)    | 177.7(4)  |
| C(3)-C(4)-C(5)-C(6)     | 176.7(4)  |
| C(17)-C(4)-C(5)-C(6)    | -5.3(8)   |
| C(4)-C(5)-C(6)-C(7)     | 151.8(5)  |
| N(1)-C(5)-C(6)-C(7)     | -31.5(6)  |
| C(4)-C(5)-C(6)-C(11)    | -31.5(7)  |
| N(1)-C(5)-C(6)-C(11)    | 145.1(4)  |
| C(11)-C(6)-C(7)-C(8)    | 0.0(7)    |
| C(5)-C(6)-C(7)-C(8)     | 176.7(4)  |
| C(6)-C(7)-C(8)-C(9)     | -1.1(7)   |
| C(7)-C(8)-C(9)-C(10)    | 1.6(8)    |
| C(8)-C(9)-C(10)-C(11)   | -0.9(8)   |
| C(7)-C(6)-C(11)-C(10)   | 0.8(7)    |
| C(5)-C(6)-C(11)-C(10)   | -176.0(4) |
| C(9)-C(10)-C(11)-C(6)   | -0.3(7)   |
| C(2)-C(3)-C(12)-O(13)   | 170.2(5)  |
| C(4)-C(3)-C(12)-O(13)   | -11.0(7)  |
| C(2)-C(3)-C(12)-O(14)   | -9.7(6)   |
| C(4)-C(3)-C(12)-O(14)   | 169.1(4)  |
| C(5)-C(4)-C(17)-C(18)   | 117.8(5)  |
| C(3)-C(4)-C(17)-C(18)   | -64.6(6)  |
| C(5)-C(4)-C(17)-C(24)   | -64.0(6)  |
| C(3)-C(4)-C(17)-C(24)   | 113.5(5)  |
| C(24)-C(17)-C(18)-O(19) | 178.3(4)  |
| C(4)-C(17)-C(18)-O(19)  | -3.5(6)   |
| C(24)-C(17)-C(18)-C(21) | -1.3(7)   |
| C(4)-C(17)-C(18)-C(21)  | 176.8(4)  |



|                         |           |
|-------------------------|-----------|
| O(19)-C(18)-C(21)-C(22) | -179.1(4) |
| C(17)-C(18)-C(21)-C(22) | 0.5(7)    |
| C(18)-C(21)-C(22)-C(23) | 0.3(7)    |
| C(21)-C(22)-C(23)-C(24) | -0.2(8)   |
| C(22)-C(23)-C(24)-C(17) | -0.7(7)   |
| C(18)-C(17)-C(24)-C(23) | 1.4(7)    |
| C(4)-C(17)-C(24)-C(23)  | -176.7(4) |
| O(13)-C(12)-O(14)-C(15) | 0.9(6)    |
| C(3)-C(12)-O(14)-C(15)  | -179.2(4) |
| C(16)-C(15)-O(14)-C(12) | 90.3(5)   |
| C(21)-C(18)-O(19)-C(20) | -9.3(6)   |
| C(17)-C(18)-O(19)-C(20) | 171.1(4)  |
| C(3)-C(2)-N(1)-C(5)     | -1.6(5)   |
| C(4)-C(5)-N(1)-C(2)     | 1.2(5)    |
| C(6)-C(5)-N(1)-C(2)     | -176.3(4) |

---

Symmetry transformations used to generate equivalent atoms:

### Compound 4c

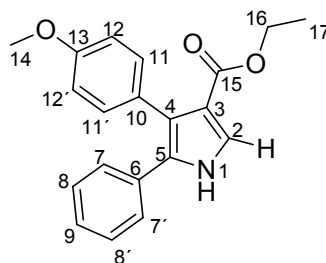

#### **Ethyl 4-(4-methoxyphenyl)-5-phenyl-1H-pyrrole-3-carboxylate (4c).** CCDC 1912422

Yield: 87%; brown solid; mp: 188-190 °C. IR (v cm<sup>-1</sup>) 3304 (N-H), 1683 (C=O). <sup>1</sup>H NMR (500 MHz, CDCl<sub>3</sub>) δ: 8.68 (s, 1H, H-1), 7.52 (d, <sup>3</sup>J<sub>H-H</sub> = 5.0 Hz, 1H, H-2), 7.11-7.09 (m, 7H, CH Ar), 6.91-6.86 (m, 2H, CH Ar), 4.10 (q, <sup>3</sup>J<sub>H-H</sub> = 7.5 Hz, 2H, H-16), 3.64 (s, 3H, H-14), 1.09 (t, <sup>3</sup>J<sub>H-H</sub> = 7.5 Hz, 3H, H-17). <sup>13</sup>C NMR (125 MHz, CDCl<sub>3</sub>) δ: 164.7 (C-15), 157.9 (C-13), 132.4 (C-6), 132.0 (C-9), 130.1 (C-10), 128.4 (C-14), 126.7 (C-8), 126.3 (C-7), 124.0 (C-3), 120.2 (C-12), 118.5 (C-4), 117.2 (C-5), 110.7 (C-2), 59.3 (C-16), 55.4 (C-14), 14.1 (C-17). HRMS (ESI<sup>+</sup>): m/z calcd for C<sub>20</sub>H<sub>19</sub>NO<sub>3</sub> [M+Na]<sup>+</sup> 344.1263, found 344.1270.

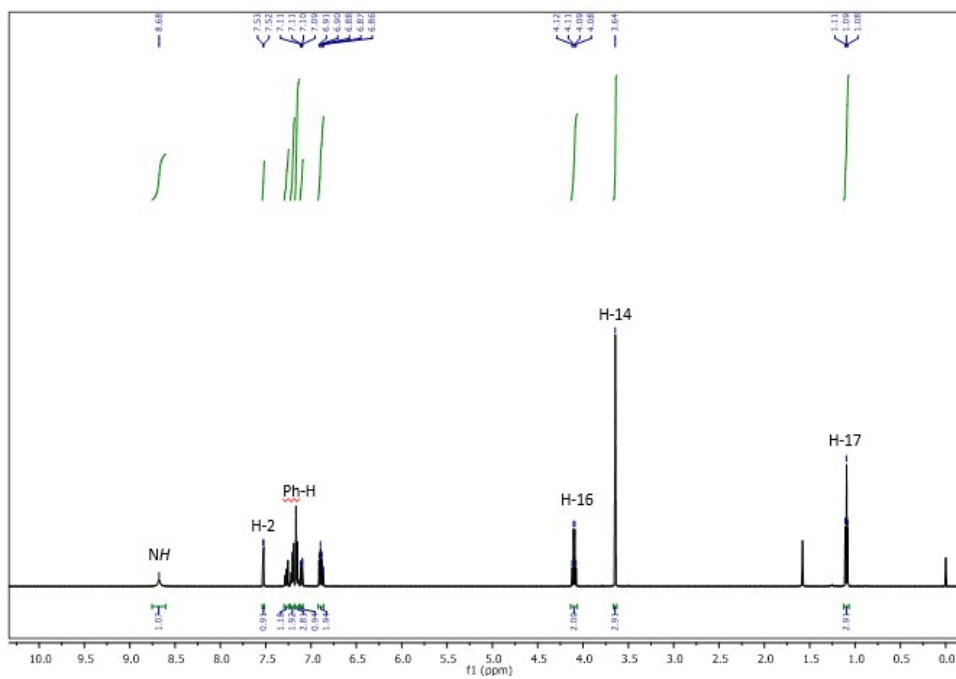

**4c NMR  $^1\text{H}$  ( $\text{CDCl}_3$ , 500 MHz).**

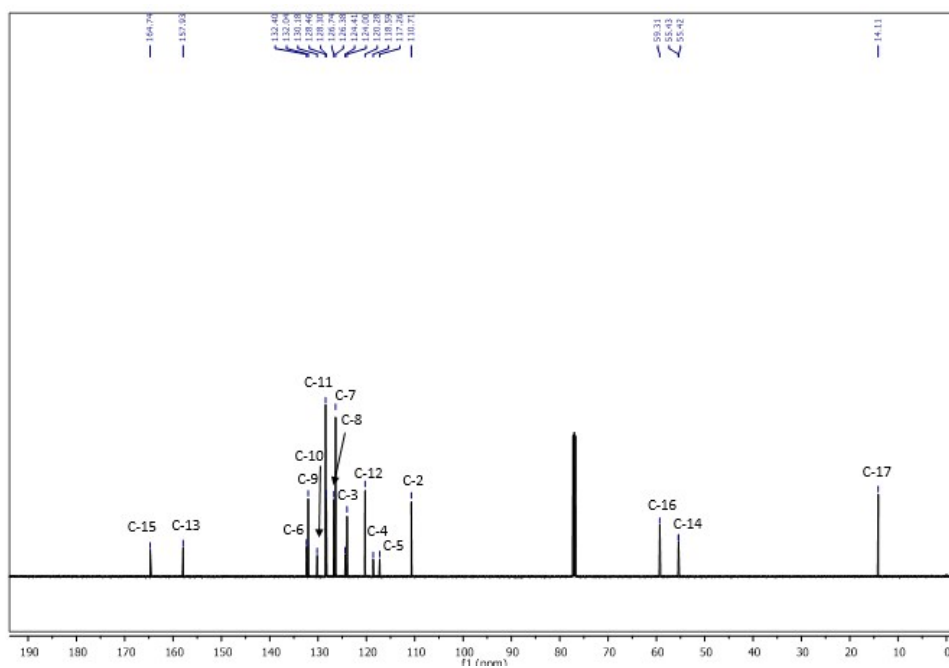

**4c NMR  $^{13}\text{C}$  ( $\text{CDCl}_3$ , 125 MHz).**

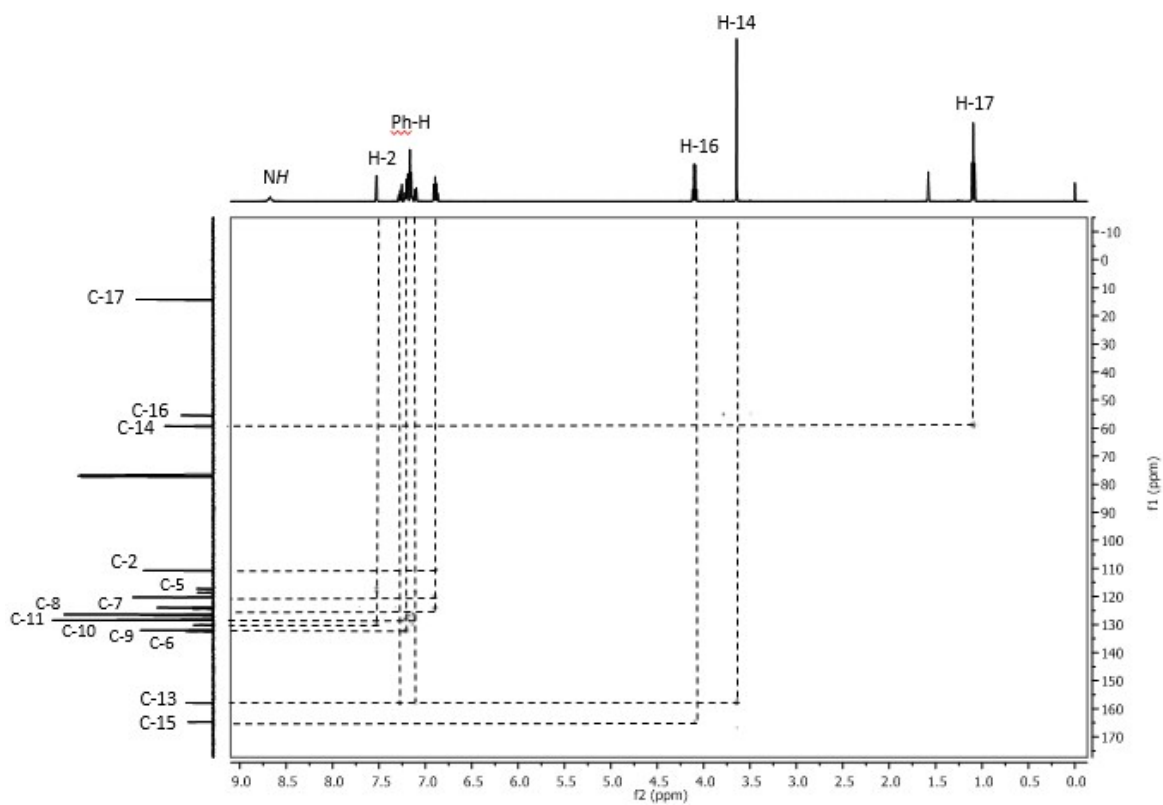

**4c NMR-HMBC (CDCl<sub>3</sub>, 500 MHz).**

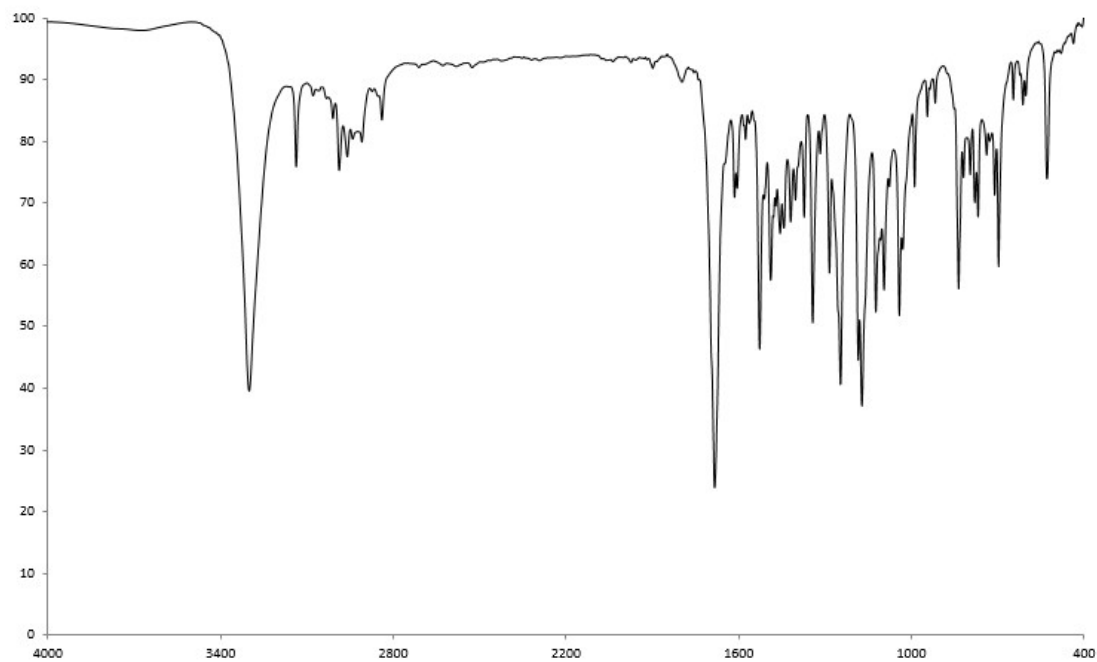

**4c IR-KBr pellet.**

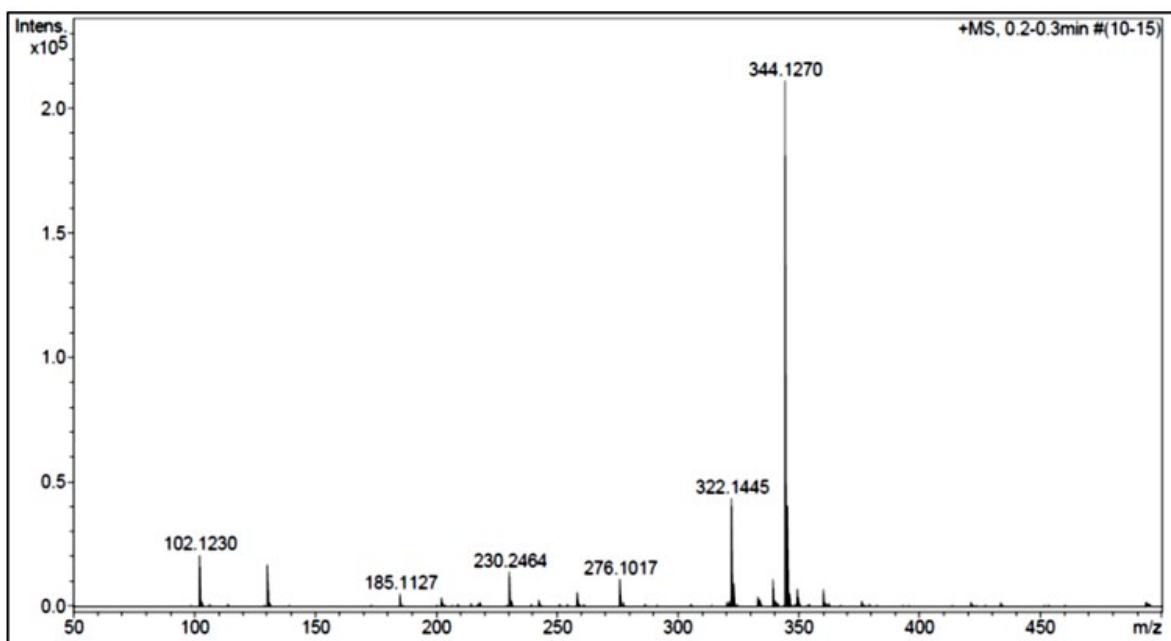

4c HRMS.

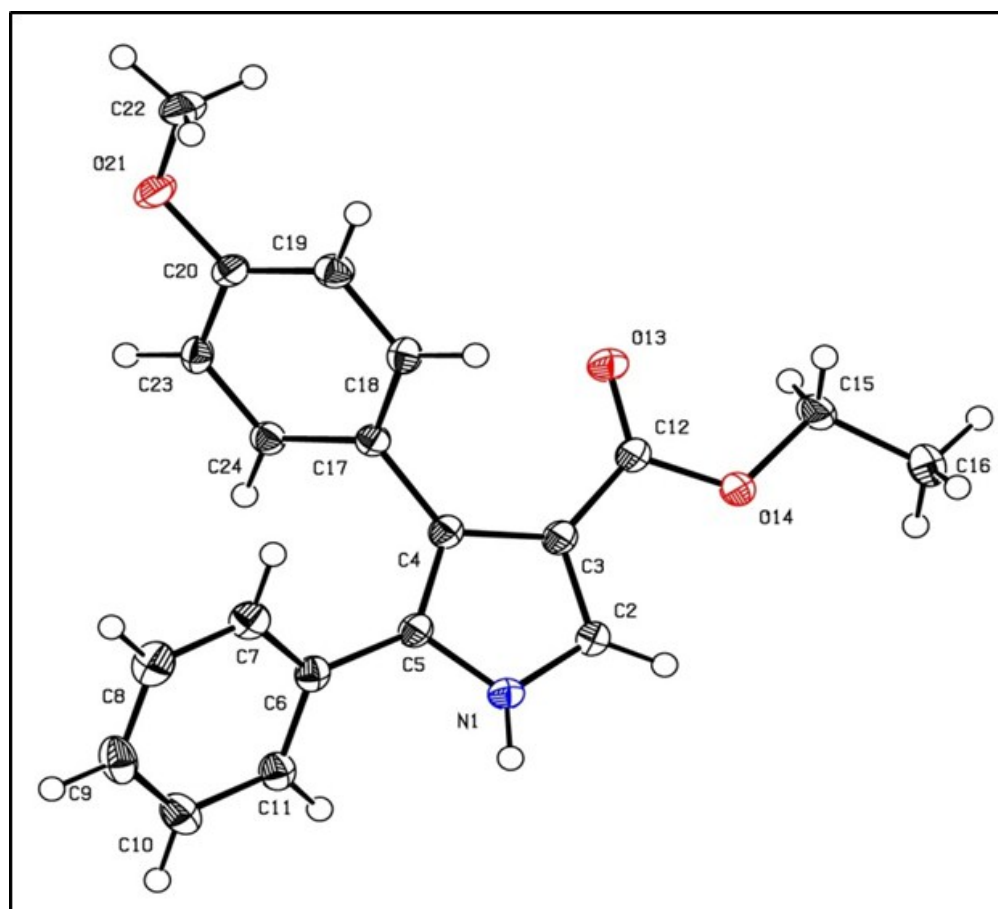

4c, X-Ray Data CDC 1912422

## Compound 4d

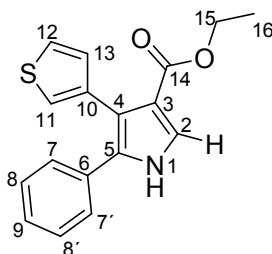

### Ethyl 5-phenyl-4-(thiophen-3-yl)-1H-pyrrole-3-carboxylate (4d). CCDC 1912423

Yield: 90%; brown crystals; mp: 178-179 °C. IR ( $\nu$   $\text{cm}^{-1}$ ) 3327 (N-H), 1681 (C=O).  $^1\text{H}$  NMR (500 MHz,  $\text{CDCl}_3$ )  $\delta$ : 8.72 (s, 1H, H-1), 7.50 (d,  $^3J_{\text{H-H}} = 5.0$  Hz, 1H, H-2), 7.27-7.17 (m, 6H, H-7, H-8, H-9 and H-11), 7.10 (dd,  $^2J_{\text{H-H}} = 1.0$  Hz, 1H, H-12), 7.05 (dd,  $^2J_{\text{H-H}} = 1.0$  Hz, H-13), 4.17 (q,  $J = 7.5$  Hz, 2H, H-15), 1.20 (t,  $^3J_{\text{H-H}} = 7.5$  Hz, 3H, H-16).  $^{13}\text{C}$  NMR (125 MHz,  $\text{CDCl}_3$ )  $\delta$ : 164.7 (C-14), 134.2 (C-10), 132.1 (C-6), 130.8 (C-9), 130.5 (C-8), 128.5 (C-12), 127.1 (C-13), 124.3 (C-7), 123.9 (C-11), 123.8 (C-2), 117.2 (C-3), 116.4 (C-4), 59.5 (C-15), 14.2 (C-16). HRMS (ESI $^+$ ):  $m/z$  calcd for  $\text{C}_{17}\text{H}_{15}\text{NO}_2\text{S}$   $[\text{M}+\text{Na}]^+$  320.0721, found 320.0724.

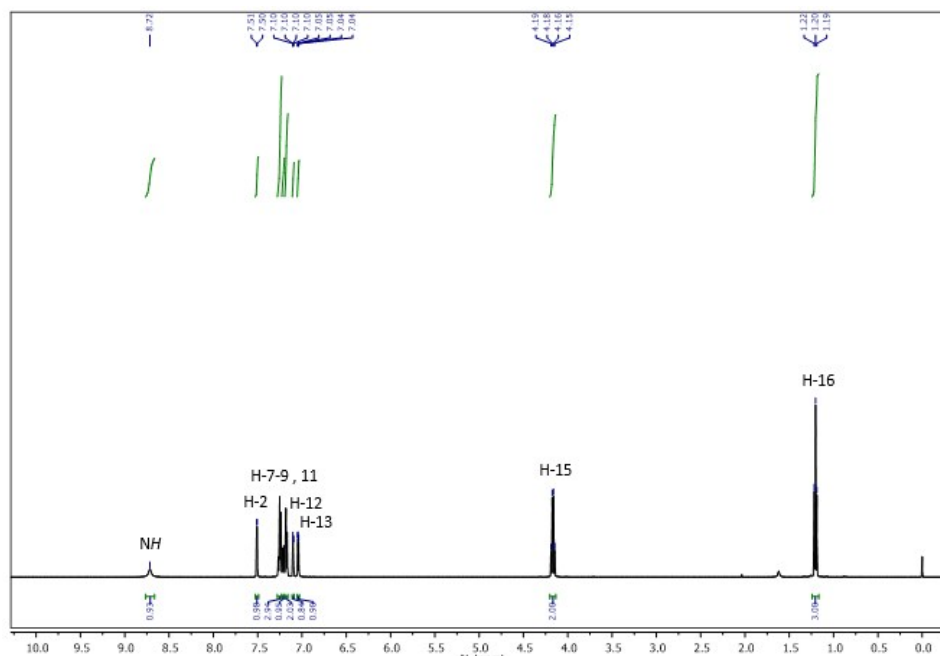

4d NMR  $^1\text{H}$  ( $\text{CDCl}_3$ , 500 MHz).

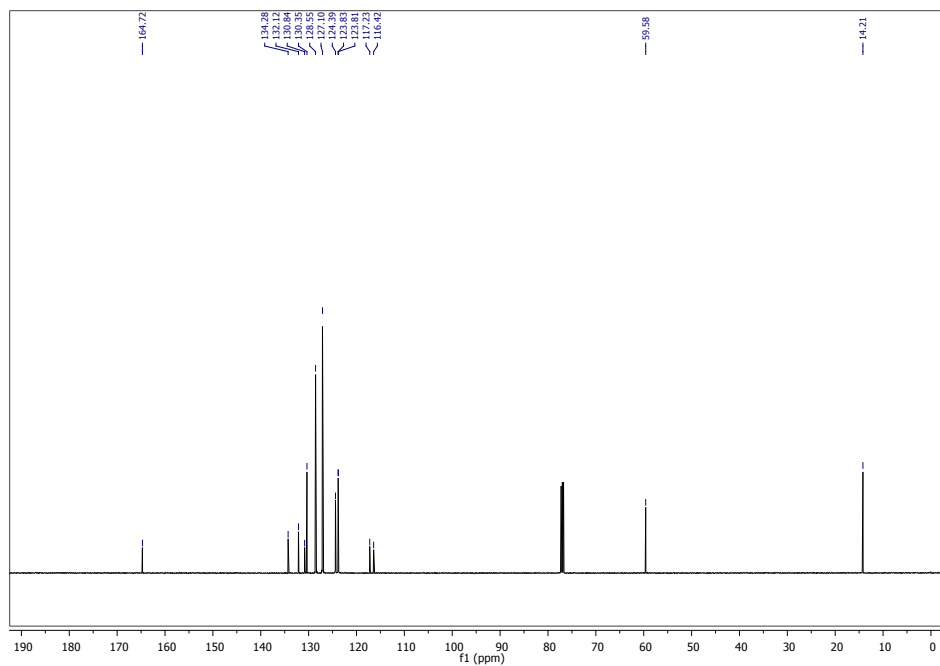

**4d NMR  $^{13}\text{C}$  ( $\text{CDCl}_3$ , 125 MHz).**

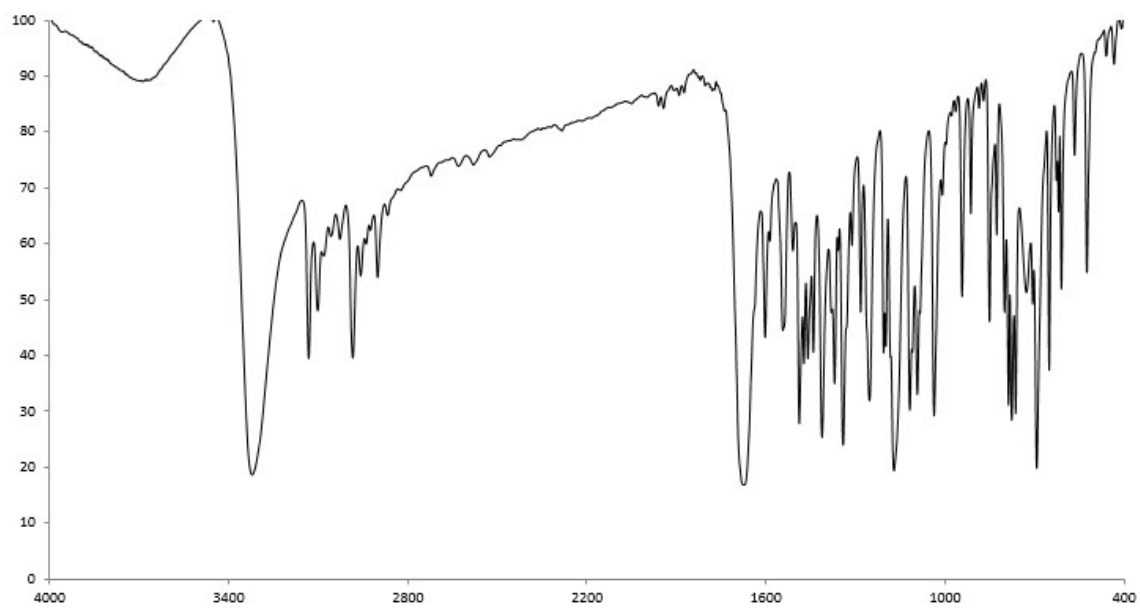

**4d IR-KBr pellet.**

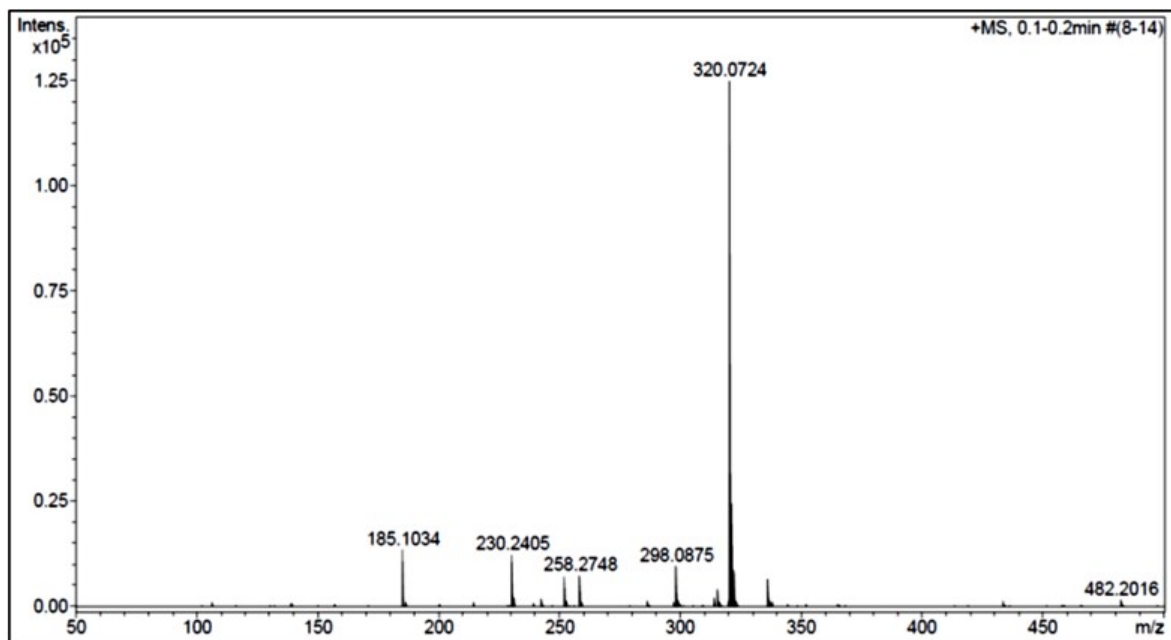

**4d HRMS.**

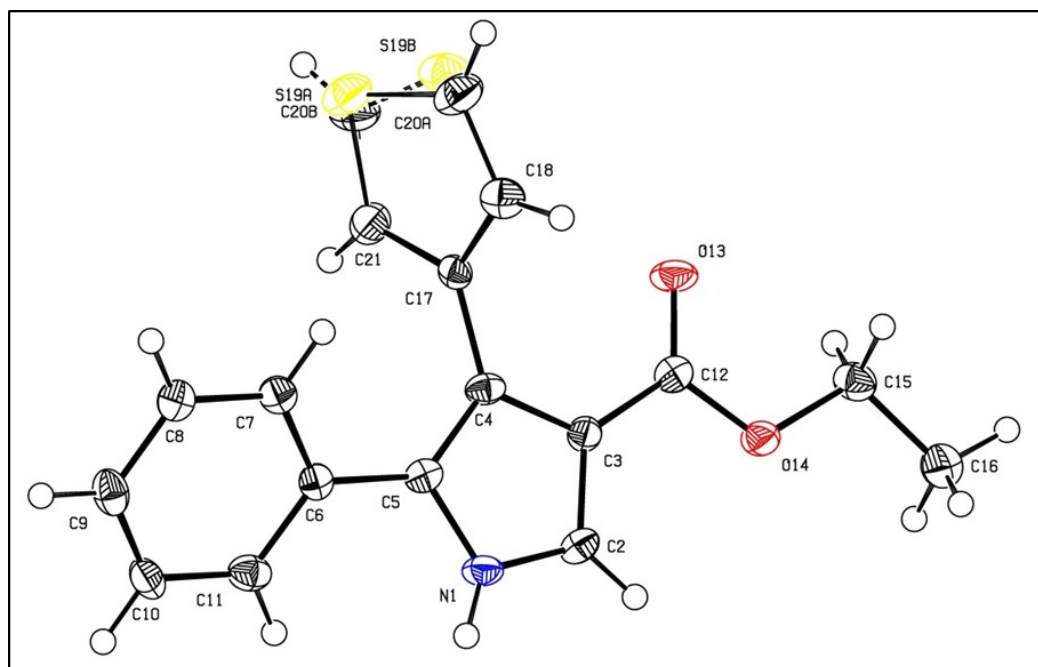

**4d, X-Ray Data CCDC 1912423**

Table 1. Crystal data and structure refinement for **4d**.

|                                   |                                                    |          |
|-----------------------------------|----------------------------------------------------|----------|
| Identification code               | <b>4d</b>                                          |          |
| Empirical formula                 | C <sub>17</sub> H <sub>15</sub> N O <sub>2</sub> S |          |
| Formula weight                    | 297.36                                             |          |
| Temperature                       | 110(2) K                                           |          |
| Wavelength                        | 0.71073 Å                                          |          |
| Crystal system                    | Orthorhombic                                       |          |
| Space group                       | P 21 21 21                                         |          |
| Unit cell dimensions              | a = 5.5576(5) Å                                    | α = 90°. |
|                                   | b = 13.3725(17) Å                                  | β = 90°. |
|                                   | c = 19.880(3) Å                                    | γ = 90°. |
| Volume                            | 1477.4(3) Å <sup>3</sup>                           |          |
| Z                                 | 4                                                  |          |
| Density (calculated)              | 1.337 Mg/m <sup>3</sup>                            |          |
| Absorption coefficient            | 0.222 mm <sup>-1</sup>                             |          |
| F(000)                            | 624                                                |          |
| Theta range for data collection   | 3.431 to 26.731°.                                  |          |
| Index ranges                      | -6 ≤ h ≤ 6, -16 ≤ k ≤ 16, -24 ≤ l ≤ 25             |          |
| Reflections collected             | 11405                                              |          |
| Independent reflections           | 3084 [R(int) = 0.0886]                             |          |
| Completeness to theta = 25.242°   | 99.7 %                                             |          |
| Refinement method                 | Full-matrix least-squares on F <sup>2</sup>        |          |
| Data / restraints / parameters    | 3084 / 2 / 201                                     |          |
| Goodness-of-fit on F <sup>2</sup> | 1.045                                              |          |
| Final R indices [I > 2σ(I)]       | R1 = 0.0550, wR2 = 0.0774                          |          |
| R indices (all data)              | R1 = 0.1093, wR2 = 0.0959                          |          |
| Absolute structure parameter      | -0.07(14)                                          |          |
| Largest diff. peak and hole       | 0.252 and -0.231 e.Å <sup>-3</sup>                 |          |



Table 2. Atomic coordinates ( $\times 10^4$ ) and equivalent isotropic displacement parameters ( $\text{\AA}^2 \times 10^3$ ) for **4d**.  $U(\text{eq})$  is defined as one third of the trace of the orthogonalized  $U^{ij}$  tensor.

|        | x        | y        | z        | $U(\text{eq})$ |
|--------|----------|----------|----------|----------------|
| C(2)   | 5378(7)  | 6386(3)  | 7323(2)  | 21(1)          |
| C(3)   | 4943(8)  | 5410(3)  | 7513(2)  | 20(1)          |
| C(4)   | 6500(7)  | 5189(3)  | 8069(2)  | 19(1)          |
| C(5)   | 7835(7)  | 6037(3)  | 8190(2)  | 20(1)          |
| C(6)   | 9689(7)  | 6276(3)  | 8696(2)  | 18(1)          |
| C(7)   | 9689(7)  | 5805(3)  | 9327(2)  | 21(1)          |
| C(8)   | 11457(7) | 6022(3)  | 9795(2)  | 23(1)          |
| C(9)   | 13243(7) | 6713(3)  | 9650(2)  | 25(1)          |
| C(10)  | 13257(7) | 7187(3)  | 9035(2)  | 25(1)          |
| C(11)  | 11489(7) | 6967(3)  | 8560(2)  | 24(1)          |
| C(12)  | 3233(7)  | 4741(3)  | 7199(2)  | 20(1)          |
| C(15)  | 25(8)    | 4569(3)  | 6420(2)  | 25(1)          |
| C(16)  | -1276(7) | 5194(4)  | 5905(2)  | 30(1)          |
| C(17)  | 6619(7)  | 4249(3)  | 8459(2)  | 18(1)          |
| C(18)  | 4858(8)  | 3933(3)  | 8907(2)  | 26(1)          |
| C(21)  | 8581(8)  | 3602(3)  | 8459(2)  | 28(1)          |
| O(13)  | 2988(5)  | 3854(2)  | 7333(1)  | 28(1)          |
| O(14)  | 1864(5)  | 5195(2)  | 6727(1)  | 24(1)          |
| S(19A) | 8298(12) | 2682(4)  | 9018(2)  | 34(1)          |
| C(20A) | 5390(50) | 3057(14) | 9246(12) | 34(1)          |
| S(19B) | 5591(11) | 2873(4)  | 9319(3)  | 33(1)          |
| C(20B) | 8320(60) | 2762(19) | 8882(11) | 33(1)          |
| N(1)   | 7134(6)  | 6752(3)  | 7723(2)  | 22(1)          |

Table 3. Bond lengths [Å] and angles [°] for **4d**.

---

|              |           |
|--------------|-----------|
| C(2)-N(1)    | 1.350(5)  |
| C(2)-C(3)    | 1.379(6)  |
| C(2)-H(2)    | 0.9500    |
| C(3)-C(4)    | 1.433(5)  |
| C(3)-C(12)   | 1.447(6)  |
| C(4)-C(5)    | 1.377(5)  |
| C(4)-C(17)   | 1.479(5)  |
| C(5)-N(1)    | 1.389(5)  |
| C(5)-C(6)    | 1.475(5)  |
| C(6)-C(11)   | 1.388(5)  |
| C(6)-C(7)    | 1.404(5)  |
| C(7)-C(8)    | 1.383(5)  |
| C(7)-H(7)    | 0.9500    |
| C(8)-C(9)    | 1.387(6)  |
| C(8)-H(8)    | 0.9500    |
| C(9)-C(10)   | 1.378(5)  |
| C(9)-H(9)    | 0.9500    |
| C(10)-C(11)  | 1.393(5)  |
| C(10)-H(10)  | 0.9500    |
| C(11)-H(11)  | 0.9500    |
| C(12)-O(13)  | 1.224(5)  |
| C(12)-O(14)  | 1.352(4)  |
| C(15)-O(14)  | 1.455(5)  |
| C(15)-C(16)  | 1.506(5)  |
| C(15)-H(15A) | 0.9900    |
| C(15)-H(15B) | 0.9900    |
| C(16)-H(16A) | 0.9800    |
| C(16)-H(16B) | 0.9800    |
| C(16)-H(16C) | 0.9800    |
| C(17)-C(21)  | 1.392(6)  |
| C(17)-C(18)  | 1.389(5)  |
| C(18)-C(20A) | 1.384(16) |
| C(18)-S(19B) | 1.688(6)  |
| C(18)-H(18)  | 0.9500    |

|               |           |
|---------------|-----------|
| C(21)-C(20B)  | 1.411(19) |
| C(21)-S(19A)  | 1.666(6)  |
| C(21)-H(21)   | 0.9500    |
| S(19A)-C(20A) | 1.75(3)   |
| C(20A)-H(20A) | 0.9500    |
| S(19B)-C(20B) | 1.75(3)   |
| C(20B)-H(20B) | 0.9500    |
| N(1)-H(1F)    | 0.87(4)   |

|                   |          |
|-------------------|----------|
| N(1)-C(2)-C(3)    | 108.0(4) |
| N(1)-C(2)-H(2)    | 126.0    |
| C(3)-C(2)-H(2)    | 126.0    |
| C(2)-C(3)-C(4)    | 107.5(4) |
| C(2)-C(3)-C(12)   | 125.6(4) |
| C(4)-C(3)-C(12)   | 127.0(4) |
| C(5)-C(4)-C(3)    | 106.9(4) |
| C(5)-C(4)-C(17)   | 125.7(3) |
| C(3)-C(4)-C(17)   | 127.4(4) |
| C(4)-C(5)-N(1)    | 107.4(3) |
| C(4)-C(5)-C(6)    | 132.4(4) |
| N(1)-C(5)-C(6)    | 120.2(4) |
| C(11)-C(6)-C(7)   | 118.2(3) |
| C(11)-C(6)-C(5)   | 121.0(3) |
| C(7)-C(6)-C(5)    | 120.8(4) |
| C(8)-C(7)-C(6)    | 120.4(4) |
| C(8)-C(7)-H(7)    | 119.8    |
| C(6)-C(7)-H(7)    | 119.8    |
| C(7)-C(8)-C(9)    | 120.6(4) |
| C(7)-C(8)-H(8)    | 119.7    |
| C(9)-C(8)-H(8)    | 119.7    |
| C(10)-C(9)-C(8)   | 119.6(4) |
| C(10)-C(9)-H(9)   | 120.2    |
| C(8)-C(9)-H(9)    | 120.2    |
| C(9)-C(10)-C(11)  | 120.0(4) |
| C(9)-C(10)-H(10)  | 120.0    |
| C(11)-C(10)-H(10) | 120.0    |

|                      |           |
|----------------------|-----------|
| C(6)-C(11)-C(10)     | 121.1(4)  |
| C(6)-C(11)-H(11)     | 119.4     |
| C(10)-C(11)-H(11)    | 119.4     |
| O(13)-C(12)-O(14)    | 121.6(4)  |
| O(13)-C(12)-C(3)     | 125.3(4)  |
| O(14)-C(12)-C(3)     | 113.1(4)  |
| O(14)-C(15)-C(16)    | 107.6(4)  |
| O(14)-C(15)-H(15A)   | 110.2     |
| C(16)-C(15)-H(15A)   | 110.2     |
| O(14)-C(15)-H(15B)   | 110.2     |
| C(16)-C(15)-H(15B)   | 110.2     |
| H(15A)-C(15)-H(15B)  | 108.5     |
| C(15)-C(16)-H(16A)   | 109.5     |
| C(15)-C(16)-H(16B)   | 109.5     |
| H(16A)-C(16)-H(16B)  | 109.5     |
| C(15)-C(16)-H(16C)   | 109.5     |
| H(16A)-C(16)-H(16C)  | 109.5     |
| H(16B)-C(16)-H(16C)  | 109.5     |
| C(21)-C(17)-C(18)    | 111.3(4)  |
| C(21)-C(17)-C(4)     | 124.3(4)  |
| C(18)-C(17)-C(4)     | 124.3(4)  |
| C(20A)-C(18)-C(17)   | 114.9(12) |
| C(17)-C(18)-S(19B)   | 113.4(4)  |
| C(20A)-C(18)-H(18)   | 122.5     |
| C(17)-C(18)-H(18)    | 122.5     |
| C(17)-C(21)-C(20B)   | 114.5(14) |
| C(17)-C(21)-S(19A)   | 112.7(4)  |
| C(17)-C(21)-H(21)    | 123.7     |
| S(19A)-C(21)-H(21)   | 123.7     |
| C(12)-O(14)-C(15)    | 115.4(3)  |
| C(21)-S(19A)-C(20A)  | 92.8(7)   |
| C(18)-C(20A)-S(19A)  | 108.2(16) |
| C(18)-C(20A)-H(20A)  | 125.9     |
| S(19A)-C(20A)-H(20A) | 125.9     |
| C(18)-S(19B)-C(20B)  | 92.2(8)   |
| C(21)-C(20B)-S(19B)  | 108.4(18) |

|                      |          |
|----------------------|----------|
| C(21)-C(20B)-H(20B)  | 125.8    |
| S(19B)-C(20B)-H(20B) | 125.8    |
| C(2)-N(1)-C(5)       | 110.3(4) |
| C(2)-N(1)-H(1F)      | 123(3)   |
| C(5)-N(1)-H(1F)      | 126(3)   |

---

Symmetry transformations used to generate equivalent atoms:

Table 4. Anisotropic displacement parameters ( $\text{\AA}^2 \times 10^3$ ) for **4d**. The anisotropic displacement factor exponent takes the form:  $-2\pi^2 [ h^2 a^{*2} U^{11} + \dots + 2 h k a^* b^* U^{12} ]$

|        | U <sup>11</sup> | U <sup>22</sup> | U <sup>33</sup> | U <sup>23</sup> | U <sup>13</sup> | U <sup>12</sup> |
|--------|-----------------|-----------------|-----------------|-----------------|-----------------|-----------------|
| C(2)   | 26(2)           | 18(2)           | 18(2)           | 0(2)            | -2(2)           | 5(2)            |
| C(3)   | 20(2)           | 16(2)           | 22(2)           | -2(2)           | -3(2)           | 1(2)            |
| C(4)   | 23(2)           | 15(2)           | 20(2)           | 1(2)            | 4(2)            | 3(2)            |
| C(5)   | 22(2)           | 18(2)           | 18(2)           | 1(2)            | 2(2)            | 2(2)            |
| C(6)   | 17(2)           | 14(2)           | 22(2)           | -6(2)           | 1(2)            | 4(2)            |
| C(7)   | 22(2)           | 18(2)           | 23(2)           | -4(2)           | 1(2)            | 1(2)            |
| C(8)   | 23(2)           | 25(3)           | 22(2)           | -2(2)           | 0(2)            | 2(2)            |
| C(9)   | 20(2)           | 27(3)           | 30(2)           | -10(2)          | -1(2)           | 0(2)            |
| C(10)  | 17(2)           | 22(2)           | 36(3)           | -5(2)           | 1(2)            | -3(2)           |
| C(11)  | 26(2)           | 20(3)           | 27(2)           | 1(2)            | 6(2)            | 1(2)            |
| C(12)  | 23(2)           | 22(3)           | 15(2)           | 0(2)            | 2(2)            | 2(2)            |
| C(15)  | 30(2)           | 23(3)           | 23(2)           | -2(2)           | -1(2)           | -5(2)           |
| C(16)  | 29(3)           | 31(3)           | 31(3)           | 0(2)            | -3(2)           | -3(2)           |
| C(17)  | 19(2)           | 16(2)           | 18(2)           | -3(2)           | -2(2)           | -2(2)           |
| C(18)  | 32(2)           | 24(3)           | 24(2)           | -3(2)           | 1(2)            | -1(2)           |
| C(21)  | 28(2)           | 26(3)           | 29(2)           | 1(2)            | -3(2)           | 2(2)            |
| O(13)  | 41(2)           | 13(2)           | 30(2)           | 1(1)            | -6(2)           | -4(2)           |
| O(14)  | 30(2)           | 18(2)           | 24(2)           | 1(1)            | -8(1)           | -3(2)           |
| S(19A) | 49(2)           | 24(2)           | 29(2)           | 2(2)            | -14(2)          | 2(1)            |
| C(20A) | 49(2)           | 24(2)           | 29(2)           | 2(2)            | -14(2)          | 2(1)            |
| S(19B) | 46(2)           | 29(2)           | 26(2)           | 5(2)            | -3(2)           | -7(2)           |
| C(20B) | 46(2)           | 29(2)           | 26(2)           | 5(2)            | -3(2)           | -7(2)           |
| N(1)   | 29(2)           | 13(2)           | 22(2)           | 1(2)            | -2(2)           | -2(2)           |

Table 5.

Hydrogen bonds for **4d** [Å and °].

| D-H...A                  | d(D-H)  | d(H...A) | d(D...A) | <(DHA) |
|--------------------------|---------|----------|----------|--------|
| C(2)-H(2)...S(19A)#1     | 0.95    | 2.83     | 3.779(7) | 173.3  |
| C(2)-H(2)...S(19B)#1     | 0.95    | 2.98     | 3.860(8) | 153.9  |
| C(21)-H(21)...O(13)#2    | 0.95    | 2.39     | 3.335(5) | 172.8  |
| C(20A)-H(20A)...S(19A)#3 | 0.95    | 2.95     | 3.77(2)  | 145.0  |
| N(1)-H(1F)...O(13)#1     | 0.87(4) | 2.00(4)  | 2.813(5) | 156(4) |

Symmetry transformations used to generate equivalent atoms:

#1 -x+1,y+1/2,-z+3/2 #2 x+1,y,z #3 x-1/2,-y+1/2,-z+2

**Compound 4e**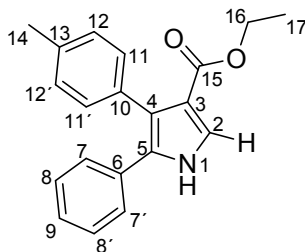

**Ethyl 5-phenyl-4-(4-tolyl)-1H-pyrrole-3-carboxylate (4e).** Yield: 80%; colorless crystals; mp: 206-208 °C. IR ( $\nu$  cm<sup>-1</sup>) 3335 (N-H), 1693 (C=O). <sup>1</sup>H NMR (500 MHz, CDCl<sub>3</sub>)  $\delta$ : 8.66 (s, 1H, H-1), 7.49 (d, <sup>3</sup>J<sub>H-H</sub> = 4.0 Hz, 1H, H-2), 7.25-7.14 (m, 7H, CH Ar), 7.09 (d, <sup>3</sup>J<sub>H-H</sub> = 10.0 Hz, 2H, H-11,11'), 4.13 (q, <sup>3</sup>J<sub>H-H</sub> = 7.5 Hz, 2H, H-16), 2.34 (s, 3H, H-14), 1.14 (t, <sup>3</sup>J<sub>H-H</sub> = 7.5 Hz, 3H, H-17). <sup>13</sup>C NMR (125 MHz, CDCl<sub>3</sub>)  $\delta$ : 164.6 (C-15), 136.0 (C-10), 132.2 (C-13), 131.7 (C-6), 130.6 (C-12), 130.0 (C-3), 128.4 (C-8), 127.0 (C-7), 126.8 (C-9), 124.1 (C-2), 122.8 (C-4), 116.3 (C-5), 59.4 (C-16), 21.2 (C-14), 14.2 (C-17). HRMS (ESI<sup>+</sup>): m/z calcd for C<sub>20</sub>H<sub>19</sub>NO<sub>2</sub> [M+Na]<sup>+</sup> 328.1313, found 328.1319.

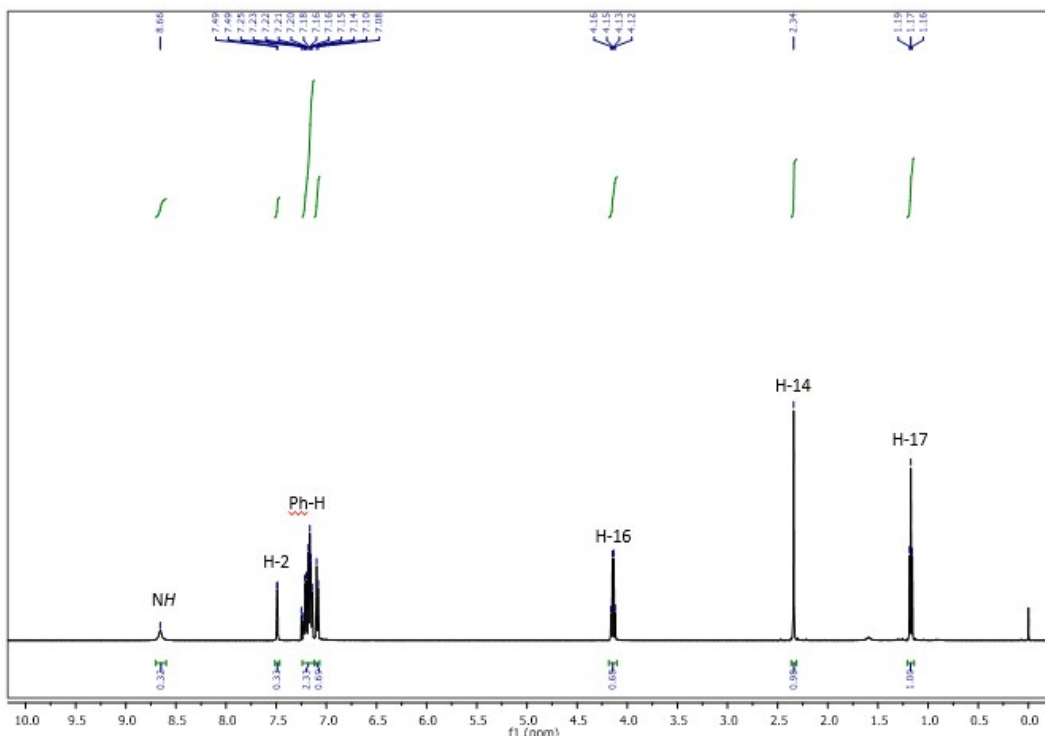

4e NMR <sup>1</sup>H (CDCl<sub>3</sub>, 500 MHz).

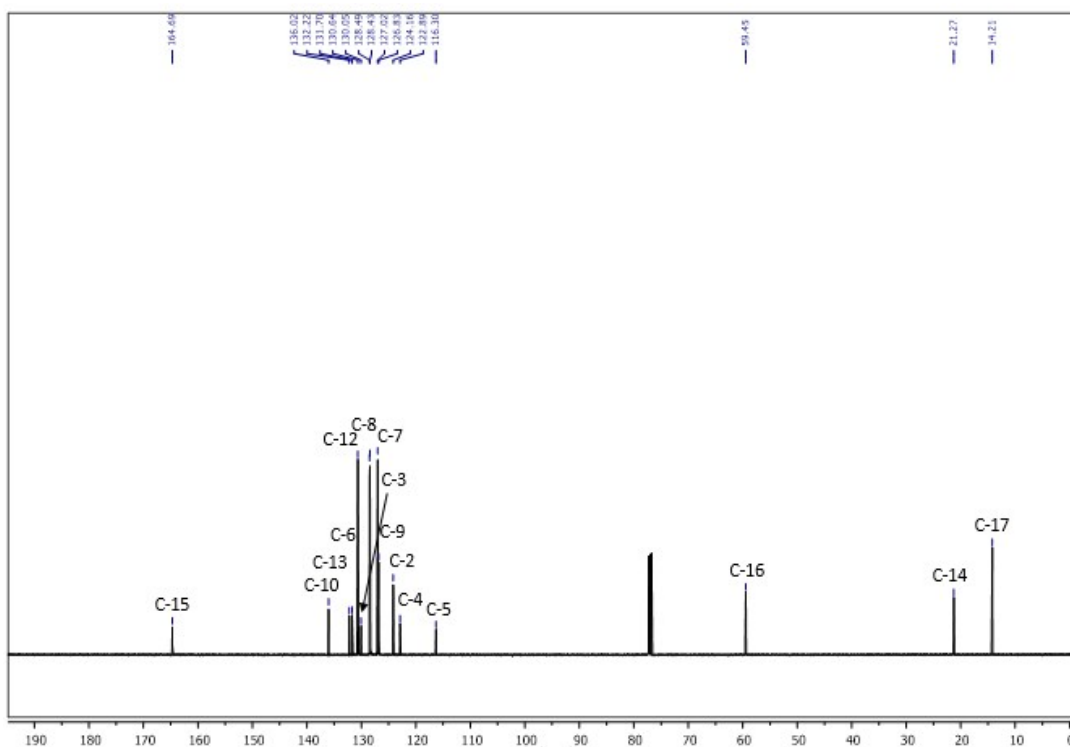

4e NMR <sup>13</sup>C (CDCl<sub>3</sub>, 125 MHz).

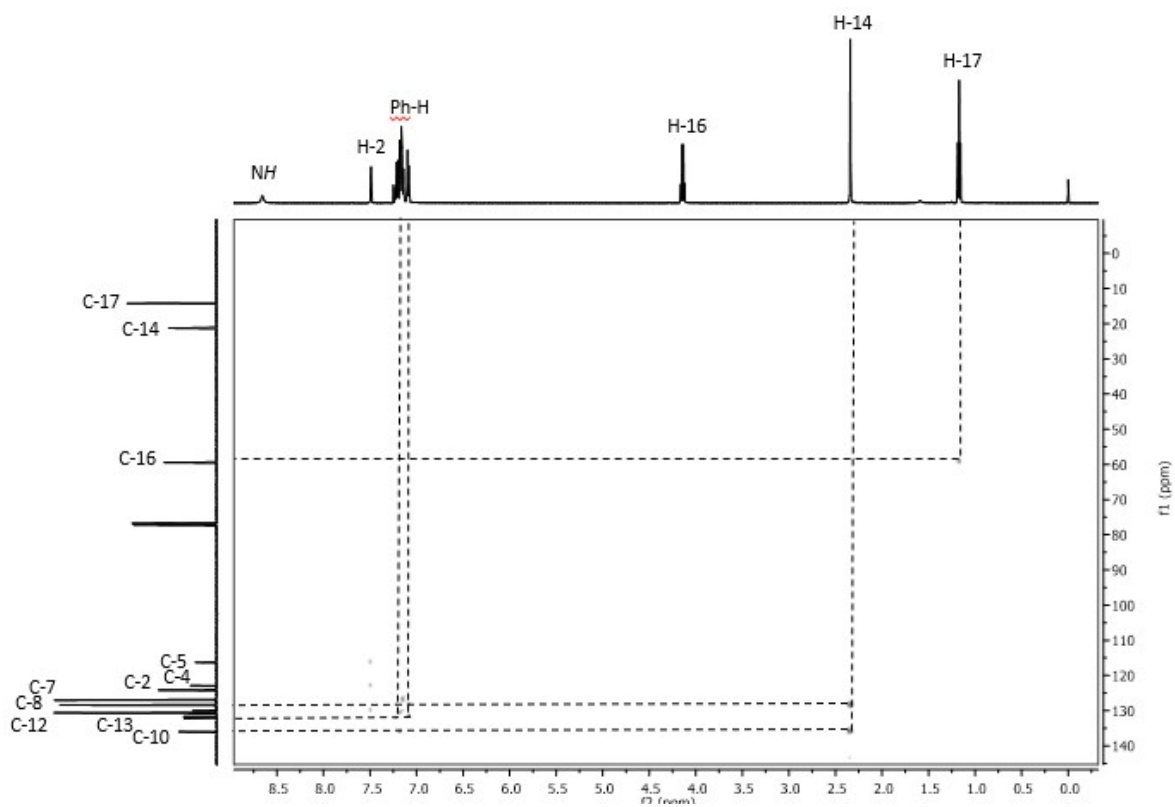

**4e NMR-HSQC (CDCl<sub>3</sub>, 500 MHz).**

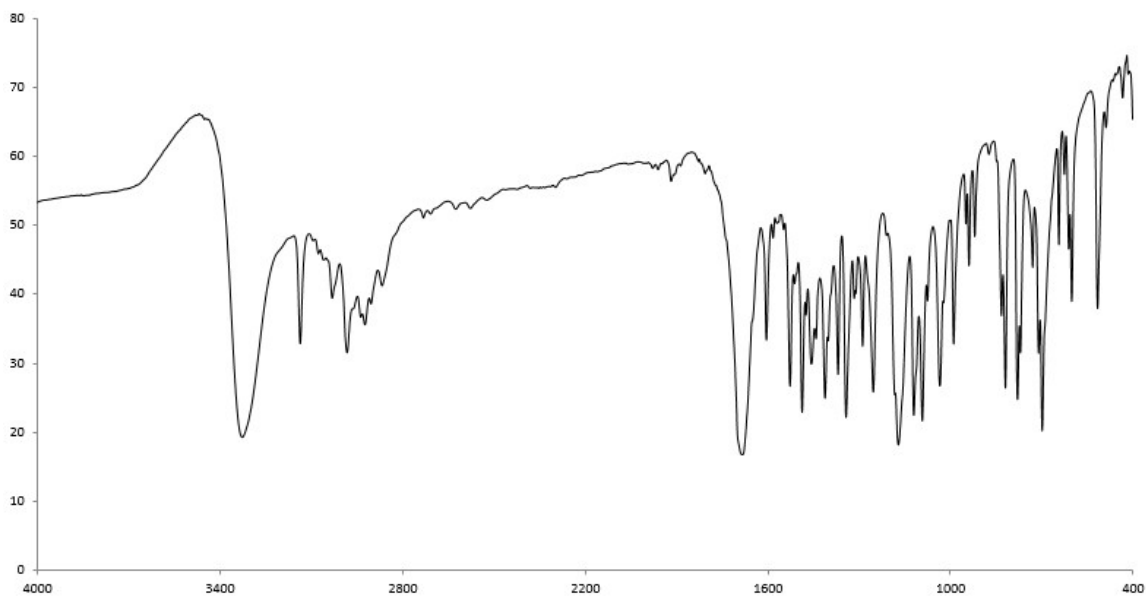

**4e IR-KBr pellet.**



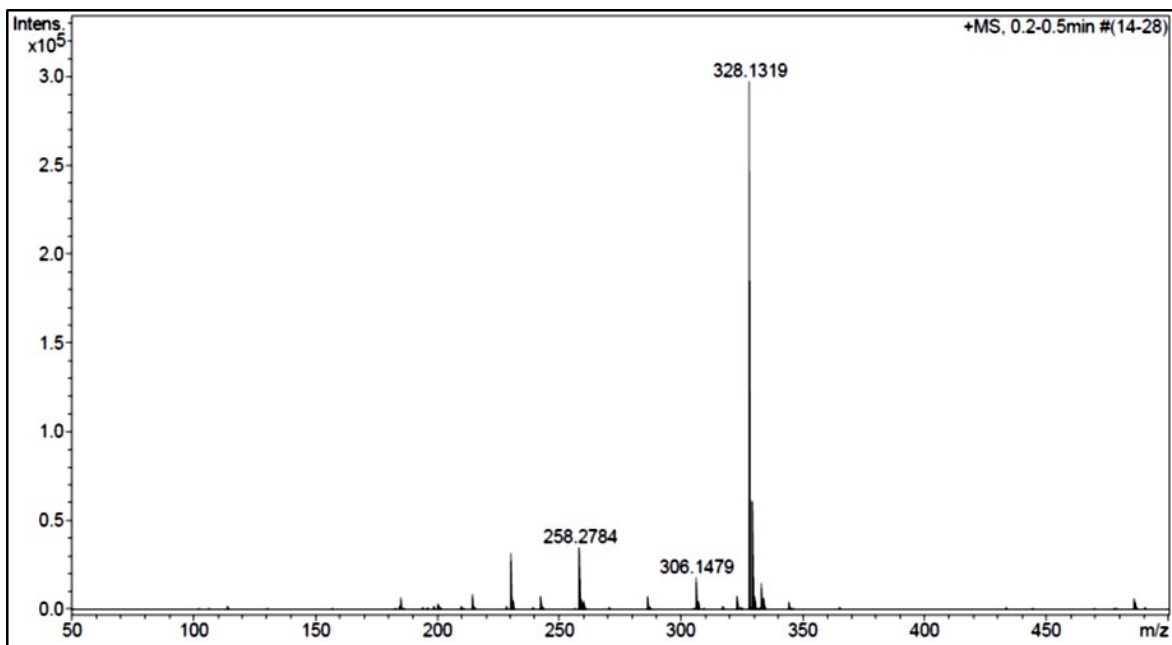

4e HRMS.

#### Compound 4f.

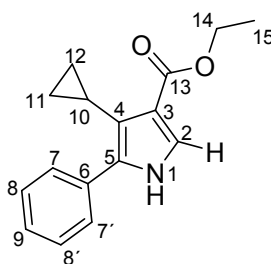

#### Ethyl 4-cyclopropyl-5-phenyl-1*H*-pyrrole-3-carboxylate (4f).

Yield: 72%; white solid; mp: 114-115 °C.  $^1\text{H}$  NMR (400 MHz,  $\text{CDCl}_3$ )  $\delta$ : 8.34 (s, 1H, H-1), 7.50 (d,  $^3J_{\text{H-H}} = 7.6$  Hz, 2H, H-7,7'), 7.42 (d,  $^3J_{\text{H-H}} = 3.0$  Hz, 1H, H-2), 7.40 (t,  $^3J_{\text{H-H}} = 7.6$  Hz, 2H, H-8,8'), 7.30 (t,  $^3J_{\text{H-H}} = 7.6$  Hz, 1H, H-9), 4.31 (q,  $^3J_{\text{H-H}} = 7.0$  Hz, 2H, H-11), 1.96 (q,  $^3J_{\text{H-H}} = 5.6$  Hz, 1H, H-10), 1.37 (t,  $^3J_{\text{H-H}} = 7.0$  Hz, 3H, H-15), 0.82 (q,  $^3J_{\text{H-H}} = 5.6$  Hz, 2H, H-11), 0.24 (q,  $^3J_{\text{H-H}} = 5.6$  Hz, H-12).  $^{13}\text{C}$  NMR (100 MHz,  $\text{CDCl}_3$ )  $\delta$ : 165.0 (C-13), 132.5 (C-6), 131.5 (C-5), 128.2 (C-7), 127.3 (C-8), 126.5 (C-9), 123.8 (C-2) 122.9 (C-4), 117.8 (C-3), 59.5 (C-14), 14.5 (C-15), 8.45 (C-11,12), 7.21 (C-10).

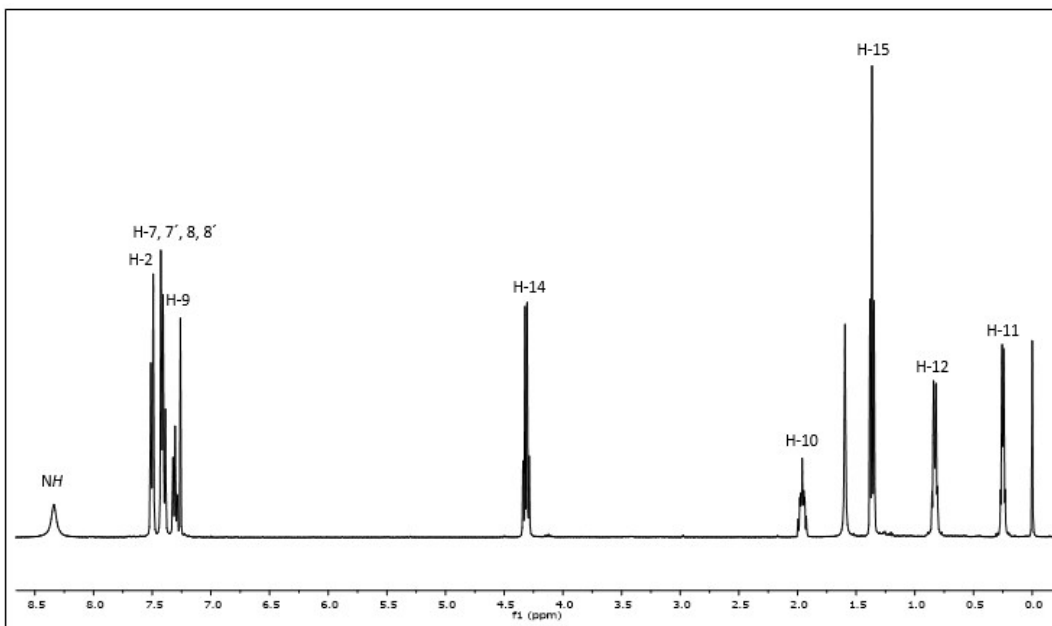

**4f NMR  $^1\text{H}$  ( $\text{CDCl}_3$ , 500 MHz).**

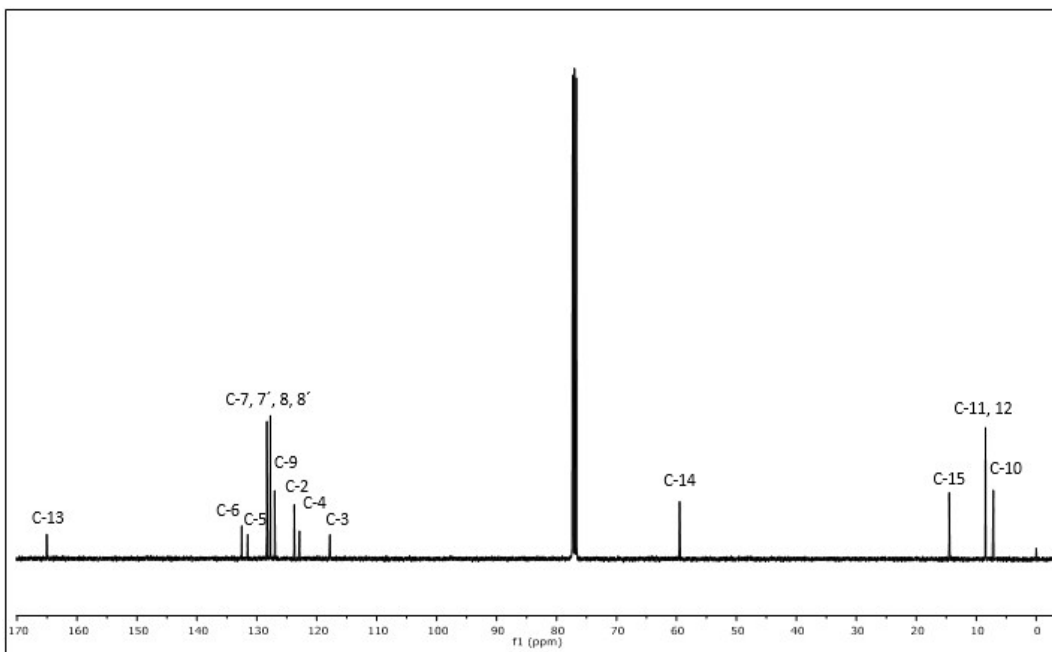

**4f NMR  $^{13}\text{C}$  ( $\text{CDCl}_3$ , 125 MHz).**

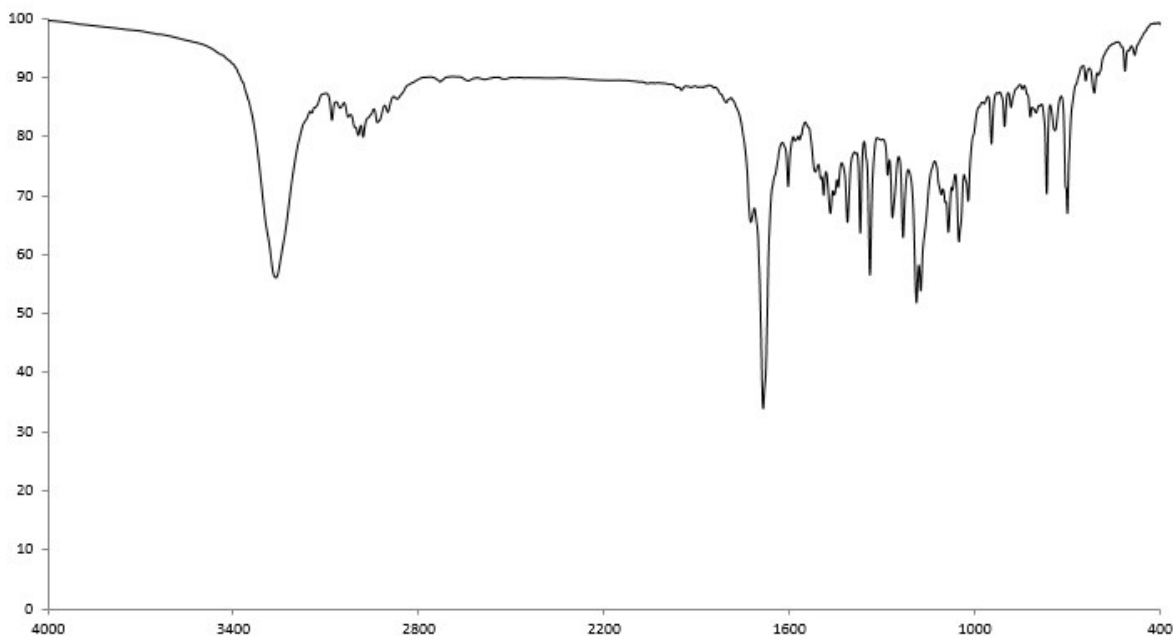

**4f IR-KBr pellet.**

### Compound 4g

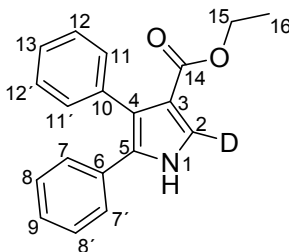

**Ethyl 4,5-diphenyl-1*H*-pyrrole-3-carboxylate-2-*d* (4g).** Yield: 80%; colorless crystals; mp: 202-204 °C. IR ( $\nu$   $\text{cm}^{-1}$ ) 3327 (N-H), 1685 (C=O).  $^1\text{H}$  NMR (500 MHz,  $\text{CDCl}_3$ )  $\delta$ : 8.52 (s, 1H, H-1), 7.25-7.14 (m, 10H, H-1, Ph-*H*), 4.15 (q,  $^3J_{\text{H-H}} = 5.0$  Hz, 2H, H-15), 1.15 (t,  $^3J_{\text{H-H}} = 5.0$  Hz, 3H, H-16).  $^{13}\text{C}$  NMR (125 MHz,  $\text{CDCl}_3$ )  $\delta$ : 164.7 (C-14), 134.9 (C-10), 132.0 (C-6), 130.8 (C-8), 130.1 (C-12), 128.5 (C-9), 127.6 (C-7), 127.0 (C-13) (C-11), 126.9 (C-2), 126.5 (C-4), 124.2 (C-5), 122.8 (C-3), 116.4, 59.5 (C-15), 14.1 (C-16). HRMS (ESI<sup>+</sup>):  $m/z$  calcd for  $\text{C}_{19}\text{H}_{16}\text{DNO}_2$  292.1322, found 292.1338.

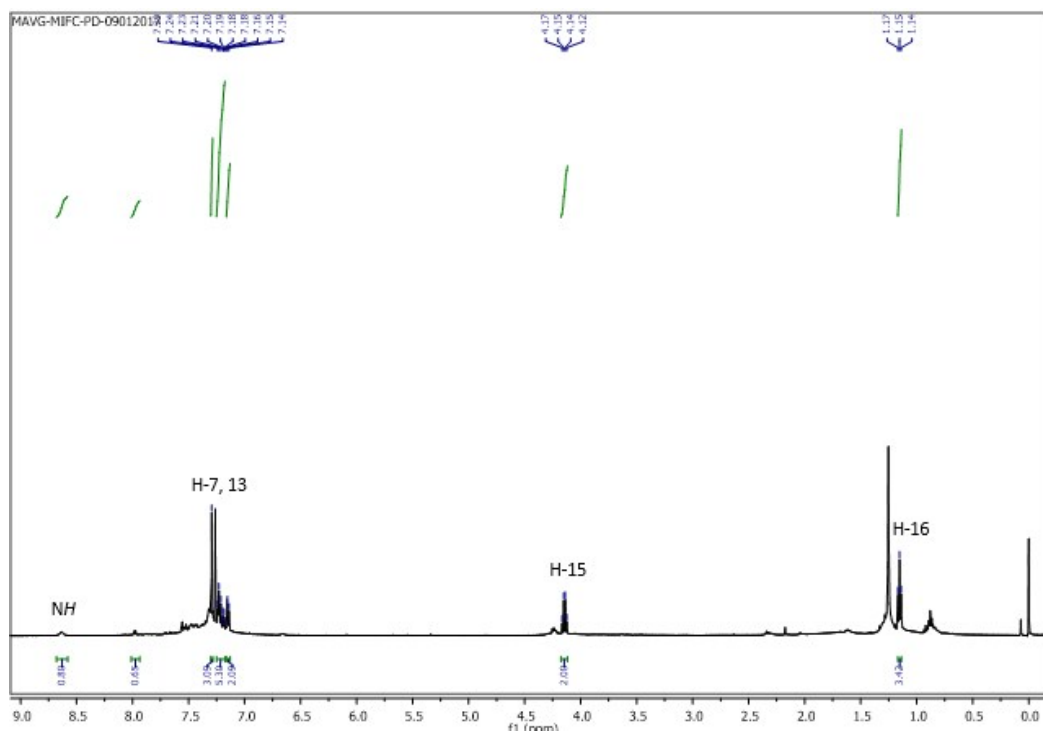

**4g NMR  $^1\text{H}$  ( $\text{CDCl}_3$ , 500 MHz).**

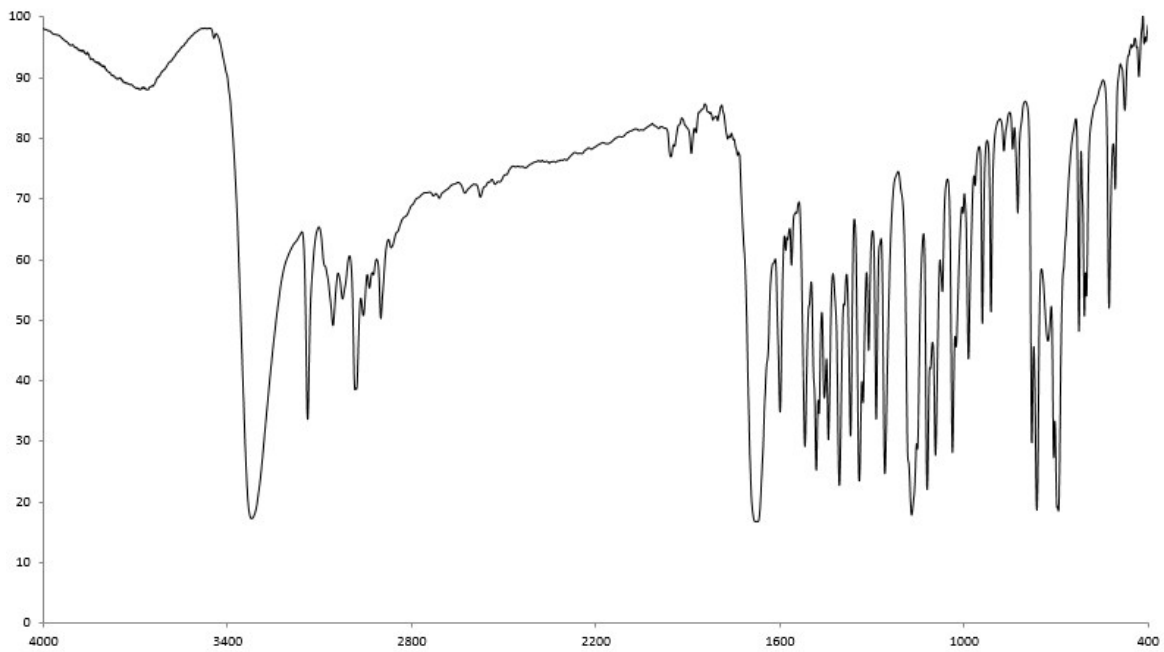

**4g IR-KBr pellet.**

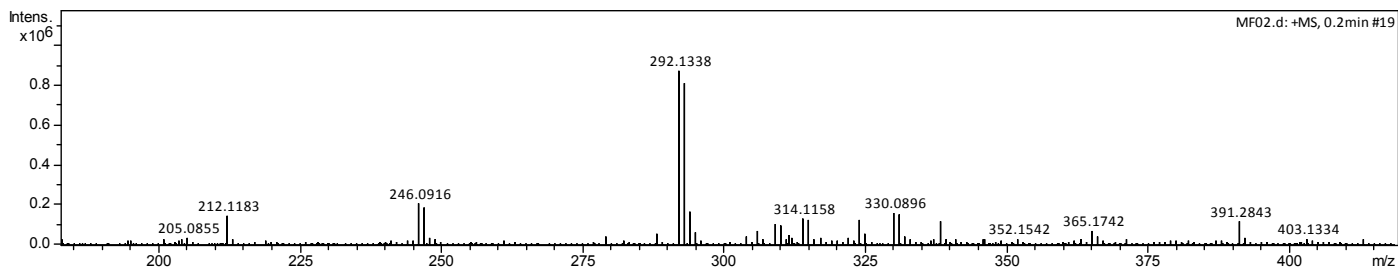

**4g HRMS.**

## Compound 4h

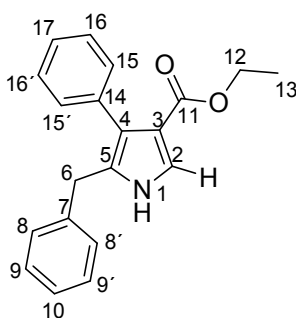

**Ethyl 5-benzyl-4-phenyl-1H-pyrrole-3-carboxylate (4h) CCDC 1912569.** Yield: 50%; white solid; mp: 126-127 °C.  $^1\text{H}$  NMR (400 MHz,  $\text{CDCl}_3$ )  $\delta$ : 1.16 (t,  $^3J_{\text{H-H}} = 7.1$  Hz, 3H, H-13), 3.9 (s, 2H, H-6) 4.14 (c,  $^3J_{\text{H-H}} = 7.1$  Hz 2H, H-12), 8.18 (s, 1H, H-1), 7.20-7.37 (m, 5H, H-2, H-9,9' and H-16,16'), 7.17-7.30 (m, 4H, H-10, H-15,15', H-17), 7.12 (d,  $^3J_{\text{H-H}} = 7.6$  Hz, 2H, H-8,8')  $^{13}\text{C}$  NMR (100 MHz,  $\text{CDCl}_3$ )  $\delta$ : 164.8 (C-11), 139.0 (C-7), 134.9 (C-14), 130.5 (C-16,16') 129.1 (C-5), 128.8 (C-15,15'), 128.5 (C-8,8'), 127.6 (C-9,9'), 126.6 (C-17), 126.4 (C-10), 123.5 (C-2), 123.2 (C-4), 114.8 (C-3), 59.3 (C-12), 14.2 (C-13). HRMS (ESI<sup>+</sup>): m/z calcd for  $\text{C}_{20}\text{H}_{19}\text{NO}_2$   $[\text{M}+\text{Na}]^+$  328.1313, found 328.1319.

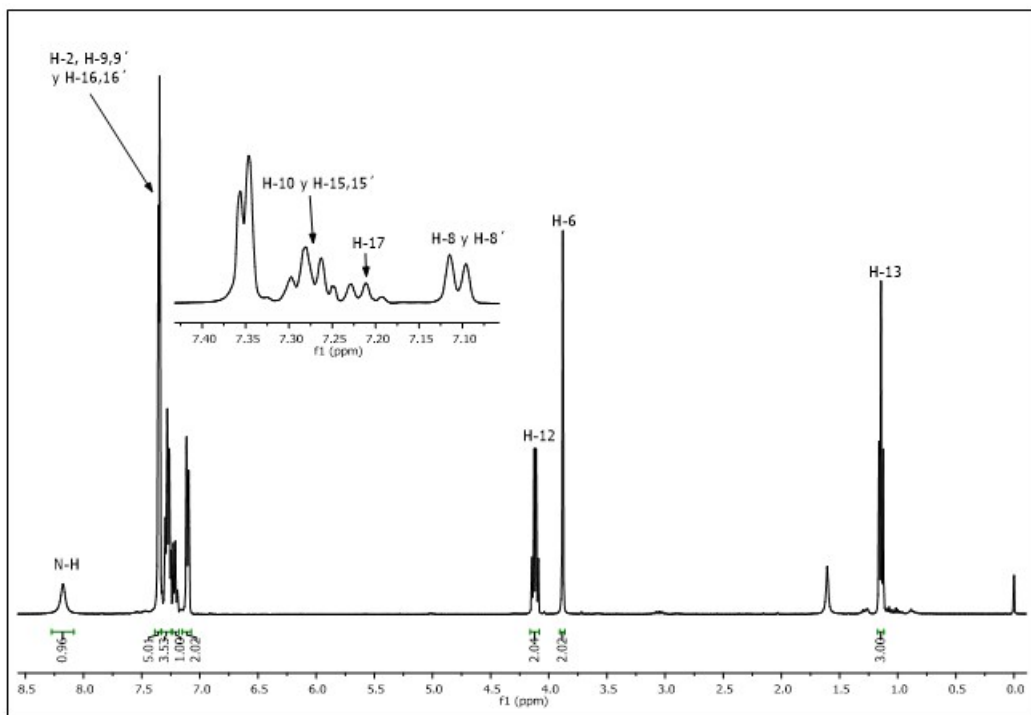

**4h NMR  $^1\text{H}$  ( $\text{CDCl}_3$ , 500 MHz).**

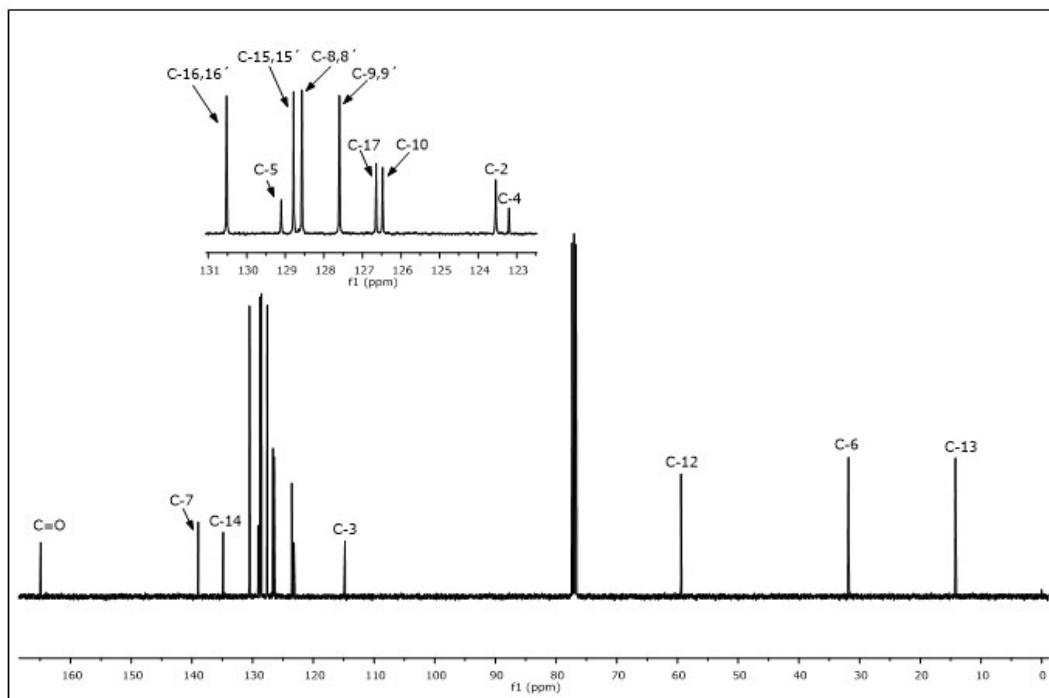

**4h NMR  $^{13}\text{C}$  ( $\text{CDCl}_3$ , 125 MHz).**

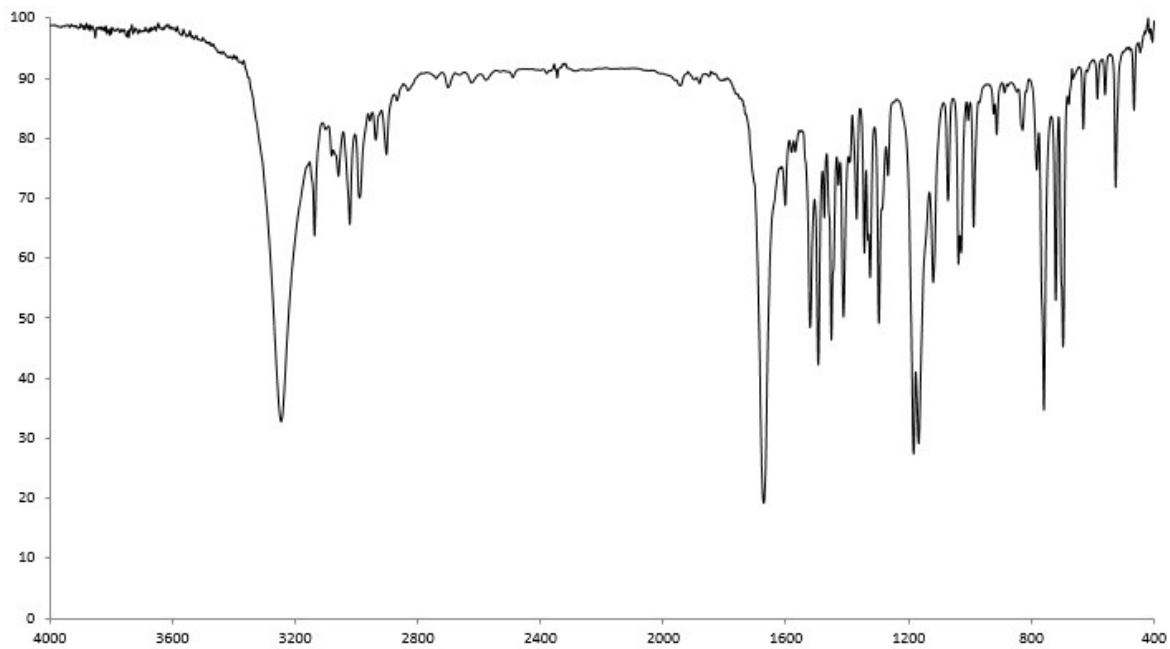

**4h IR-KBr pellet.**

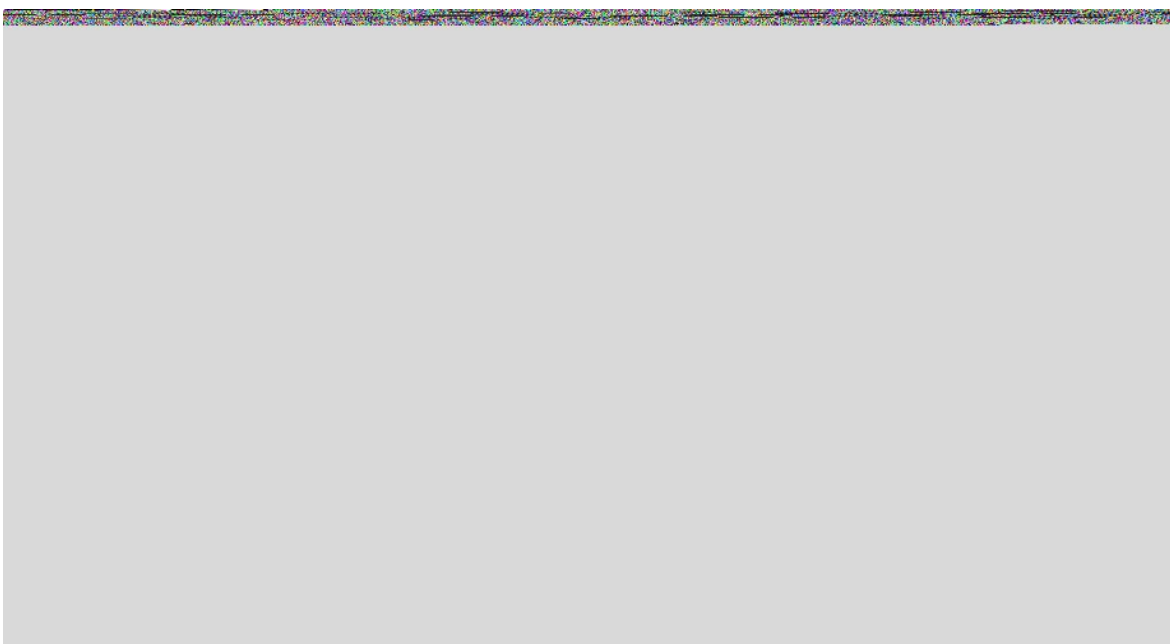

**4h HRMS.**

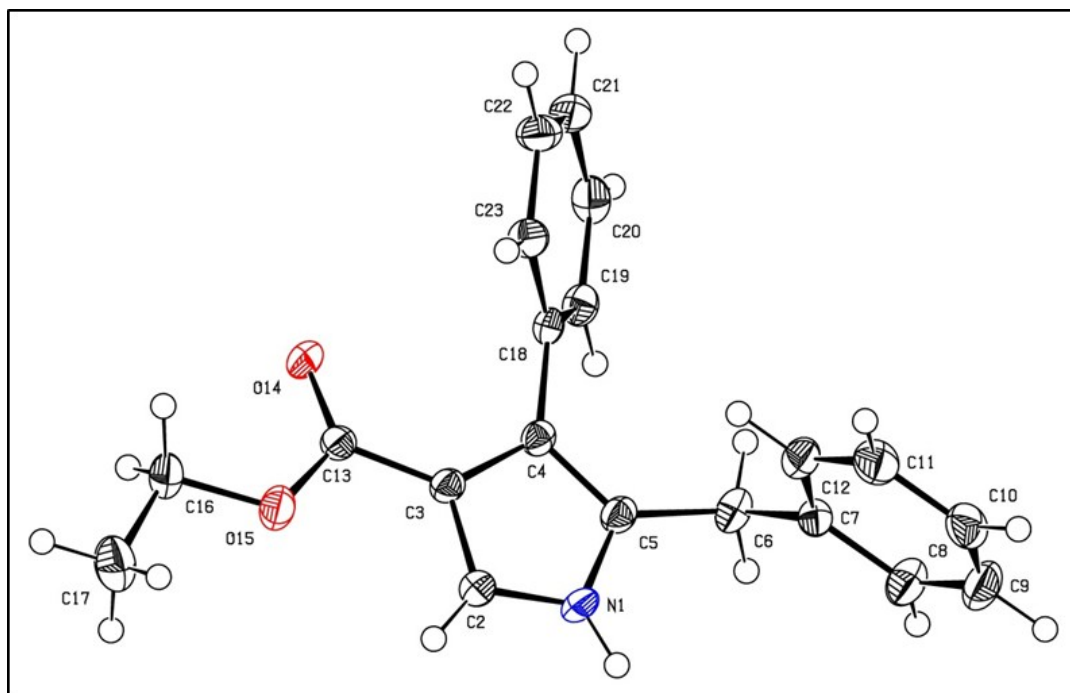

#### 4h X-Ray Data CCDC 1912569

Table 1. Crystal data and structure refinement for **4h**.

|                                 |                                                  |                 |
|---------------------------------|--------------------------------------------------|-----------------|
| Identification code             | <b>4h</b>                                        |                 |
| Empirical formula               | C <sub>20</sub> H <sub>19</sub> N O <sub>2</sub> |                 |
| Formula weight                  | 305.36                                           |                 |
| Temperature                     | 130(2) K                                         |                 |
| Wavelength                      | 0.71073 Å                                        |                 |
| Crystal system                  | Monoclinic                                       |                 |
| Space group                     | P 2 <sub>1</sub> /n                              |                 |
| Unit cell dimensions            | a = 6.1237(3) Å                                  | α = 90°.        |
|                                 | b = 21.7422(10) Å                                | β = 96.668(4)°. |
|                                 | c = 12.4311(5) Å                                 | γ = 90°.        |
| Volume                          | 1643.91(13) Å <sup>3</sup>                       |                 |
| Z                               | 4                                                |                 |
| Density (calculated)            | 1.234 Mg/m <sup>3</sup>                          |                 |
| Absorption coefficient          | 0.079 mm <sup>-1</sup>                           |                 |
| F(000)                          | 648                                              |                 |
| Theta range for data collection | 3.431 to 26.354°.                                |                 |
| Index ranges                    | -7 ≤ h ≤ 7, -27 ≤ k ≤ 22, -14 ≤ l ≤ 15           |                 |
| Reflections collected           | 11826                                            |                 |
| Independent reflections         | 3359 [R(int) = 0.0249]                           |                 |



|                                   |                                             |
|-----------------------------------|---------------------------------------------|
| Completeness to theta = 25.242°   | 99.8 %                                      |
| Refinement method                 | Full-matrix least-squares on F <sup>2</sup> |
| Data / restraints / parameters    | 3359 / 0 / 209                              |
| Goodness-of-fit on F <sup>2</sup> | 1.047                                       |
| Final R indices [I>2sigma(I)]     | R1 = 0.0386, wR2 = 0.0916                   |
| R indices (all data)              | R1 = 0.0466, wR2 = 0.0965                   |
| Largest diff. peak and hole       | 0.213 and -0.193 e.Å <sup>-3</sup>          |

Table 2. Atomic coordinates ( x 10<sup>4</sup>) and equivalent isotropic displacement parameters (Å<sup>2</sup>x 10<sup>3</sup>) for **4h**. U(eq) is defined as one third of the trace of the orthogonalized U<sup>ij</sup> tensor.

|       | x        | y       | z       | U(eq) |
|-------|----------|---------|---------|-------|
| C(2)  | 4145(2)  | 2499(1) | 4496(1) | 25(1) |
| C(3)  | 4387(2)  | 2267(1) | 3486(1) | 21(1) |
| C(4)  | 2714(2)  | 1808(1) | 3242(1) | 20(1) |
| C(5)  | 1530(2)  | 1788(1) | 4115(1) | 22(1) |
| C(6)  | -302(2)  | 1377(1) | 4369(1) | 26(1) |
| C(7)  | 341(2)   | 950(1)  | 5320(1) | 23(1) |
| C(8)  | -1054(2) | 852(1)  | 6103(1) | 32(1) |
| C(9)  | -482(3)  | 446(1)  | 6952(1) | 36(1) |
| C(10) | 1502(2)  | 140(1)  | 7031(1) | 32(1) |
| C(11) | 2911(2)  | 235(1)  | 6261(1) | 33(1) |
| C(12) | 2331(2)  | 637(1)  | 5409(1) | 28(1) |
| C(13) | 5937(2)  | 2512(1) | 2790(1) | 21(1) |
| C(16) | 8951(2)  | 3196(1) | 2722(1) | 30(1) |
| C(17) | 10222(3) | 3637(1) | 3481(1) | 39(1) |
| C(18) | 2391(2)  | 1400(1) | 2284(1) | 20(1) |
| C(19) | 358(2)   | 1351(1) | 1653(1) | 24(1) |
| C(20) | 82(2)    | 959(1)  | 768(1)  | 28(1) |
| C(21) | 1819(2)  | 607(1)  | 496(1)  | 31(1) |
| C(22) | 3841(2)  | 649(1)  | 1118(1) | 30(1) |
| C(23) | 4126(2)  | 1040(1) | 2001(1) | 25(1) |
| N(1)  | 2429(2)  | 2210(1) | 4864(1) | 26(1) |
| O(14) | 5975(2)  | 2383(1) | 1841(1) | 29(1) |
| O(15) | 7336(2)  | 2911(1) | 3323(1) | 30(1) |

---

Table 3. Bond lengths [Å] and angles [°] for **4h**.

---

|              |            |
|--------------|------------|
| C(2)-N(1)    | 1.3487(17) |
| C(2)-C(3)    | 1.3769(17) |
| C(2)-H(2)    | 0.9500     |
| C(3)-C(4)    | 1.4375(17) |
| C(3)-C(13)   | 1.4570(16) |
| C(4)-C(5)    | 1.3744(17) |
| C(4)-C(18)   | 1.4800(17) |
| C(5)-N(1)    | 1.3761(17) |
| C(5)-C(6)    | 1.4960(17) |
| C(6)-C(7)    | 1.5189(18) |
| C(6)-H(6A)   | 0.9900     |
| C(6)-H(6B)   | 0.9900     |
| C(7)-C(8)    | 1.3840(18) |
| C(7)-C(12)   | 1.3881(19) |
| C(8)-C(9)    | 1.390(2)   |
| C(8)-H(8)    | 0.9500     |
| C(9)-C(10)   | 1.378(2)   |
| C(9)-H(9)    | 0.9500     |
| C(10)-C(11)  | 1.377(2)   |
| C(10)-H(10)  | 0.9500     |
| C(11)-C(12)  | 1.387(2)   |
| C(11)-H(11)  | 0.9500     |
| C(12)-H(12)  | 0.9500     |
| C(13)-O(14)  | 1.2153(15) |
| C(13)-O(15)  | 1.3387(16) |
| C(16)-O(15)  | 1.4466(15) |
| C(16)-C(17)  | 1.499(2)   |
| C(16)-H(16A) | 0.9900     |
| C(16)-H(16B) | 0.9900     |
| C(17)-H(17A) | 0.9800     |
| C(17)-H(17B) | 0.9800     |
| C(17)-H(17C) | 0.9800     |
| C(18)-C(19)  | 1.3960(17) |

|                  |            |
|------------------|------------|
| C(18)-C(23)      | 1.3960(17) |
| C(19)-C(20)      | 1.3879(18) |
| C(19)-H(19)      | 0.9500     |
| C(20)-C(21)      | 1.383(2)   |
| C(20)-H(20)      | 0.9500     |
| C(21)-C(22)      | 1.384(2)   |
| C(21)-H(21)      | 0.9500     |
| C(22)-C(23)      | 1.3836(18) |
| C(22)-H(22)      | 0.9500     |
| C(23)-H(23)      | 0.9500     |
| N(1)-H(1)        | 0.8800     |
|                  |            |
| N(1)-C(2)-C(3)   | 108.09(12) |
| N(1)-C(2)-H(2)   | 126.0      |
| C(3)-C(2)-H(2)   | 126.0      |
| C(2)-C(3)-C(4)   | 107.23(11) |
| C(2)-C(3)-C(13)  | 123.69(12) |
| C(4)-C(3)-C(13)  | 128.78(11) |
| C(5)-C(4)-C(3)   | 106.52(11) |
| C(5)-C(4)-C(18)  | 125.64(11) |
| C(3)-C(4)-C(18)  | 127.71(10) |
| C(4)-C(5)-N(1)   | 107.87(11) |
| C(4)-C(5)-C(6)   | 131.52(12) |
| N(1)-C(5)-C(6)   | 120.43(11) |
| C(5)-C(6)-C(7)   | 113.35(10) |
| C(5)-C(6)-H(6A)  | 108.9      |
| C(7)-C(6)-H(6A)  | 108.9      |
| C(5)-C(6)-H(6B)  | 108.9      |
| C(7)-C(6)-H(6B)  | 108.9      |
| H(6A)-C(6)-H(6B) | 107.7      |
| C(8)-C(7)-C(12)  | 118.47(12) |
| C(8)-C(7)-C(6)   | 121.02(12) |
| C(12)-C(7)-C(6)  | 120.50(11) |
| C(7)-C(8)-C(9)   | 120.62(13) |
| C(7)-C(8)-H(8)   | 119.7      |
| C(9)-C(8)-H(8)   | 119.7      |

|                     |            |
|---------------------|------------|
| C(10)-C(9)-C(8)     | 120.23(13) |
| C(10)-C(9)-H(9)     | 119.9      |
| C(8)-C(9)-H(9)      | 119.9      |
| C(11)-C(10)-C(9)    | 119.75(13) |
| C(11)-C(10)-H(10)   | 120.1      |
| C(9)-C(10)-H(10)    | 120.1      |
| C(10)-C(11)-C(12)   | 119.98(13) |
| C(10)-C(11)-H(11)   | 120.0      |
| C(12)-C(11)-H(11)   | 120.0      |
| C(11)-C(12)-C(7)    | 120.96(12) |
| C(11)-C(12)-H(12)   | 119.5      |
| C(7)-C(12)-H(12)    | 119.5      |
| O(14)-C(13)-O(15)   | 123.09(11) |
| O(14)-C(13)-C(3)    | 125.38(12) |
| O(15)-C(13)-C(3)    | 111.52(10) |
| O(15)-C(16)-C(17)   | 106.56(11) |
| O(15)-C(16)-H(16A)  | 110.4      |
| C(17)-C(16)-H(16A)  | 110.4      |
| O(15)-C(16)-H(16B)  | 110.4      |
| C(17)-C(16)-H(16B)  | 110.4      |
| H(16A)-C(16)-H(16B) | 108.6      |
| C(16)-C(17)-H(17A)  | 109.5      |
| C(16)-C(17)-H(17B)  | 109.5      |
| H(17A)-C(17)-H(17B) | 109.5      |
| C(16)-C(17)-H(17C)  | 109.5      |
| H(17A)-C(17)-H(17C) | 109.5      |
| H(17B)-C(17)-H(17C) | 109.5      |
| C(19)-C(18)-C(23)   | 118.10(11) |
| C(19)-C(18)-C(4)    | 121.62(11) |
| C(23)-C(18)-C(4)    | 120.26(11) |
| C(20)-C(19)-C(18)   | 120.71(12) |
| C(20)-C(19)-H(19)   | 119.6      |
| C(18)-C(19)-H(19)   | 119.6      |
| C(21)-C(20)-C(19)   | 120.46(12) |
| C(21)-C(20)-H(20)   | 119.8      |
| C(19)-C(20)-H(20)   | 119.8      |

|                   |            |
|-------------------|------------|
| C(20)-C(21)-C(22) | 119.40(12) |
| C(20)-C(21)-H(21) | 120.3      |
| C(22)-C(21)-H(21) | 120.3      |
| C(23)-C(22)-C(21) | 120.36(12) |
| C(23)-C(22)-H(22) | 119.8      |
| C(21)-C(22)-H(22) | 119.8      |
| C(22)-C(23)-C(18) | 120.97(12) |
| C(22)-C(23)-H(23) | 119.5      |
| C(18)-C(23)-H(23) | 119.5      |
| C(2)-N(1)-C(5)    | 110.29(10) |
| C(2)-N(1)-H(1)    | 124.9      |
| C(5)-N(1)-H(1)    | 124.9      |
| C(13)-O(15)-C(16) | 117.32(10) |

---

Symmetry transformations used to generate equivalent atoms:

Table 4. Anisotropic displacement parameters ( $\text{\AA}^2 \times 10^3$ ) for **4h**. The anisotropic displacement factor exponent takes the form:  $-2\pi^2 [ h^2 a^{*2} U^{11} + \dots + 2 h k a^* b^* U^{12} ]$

|       | $U^{11}$ | $U^{22}$ | $U^{33}$ | $U^{23}$ | $U^{13}$ | $U^{12}$ |
|-------|----------|----------|----------|----------|----------|----------|
| C(2)  | 33(1)    | 23(1)    | 21(1)    | -1(1)    | 8(1)     | -3(1)    |
| C(3)  | 25(1)    | 20(1)    | 18(1)    | 2(1)     | 5(1)     | 2(1)     |
| C(4)  | 22(1)    | 20(1)    | 18(1)    | 3(1)     | 4(1)     | 3(1)     |
| C(5)  | 25(1)    | 22(1)    | 20(1)    | 3(1)     | 6(1)     | 4(1)     |
| C(6)  | 23(1)    | 33(1)    | 25(1)    | 5(1)     | 7(1)     | 0(1)     |
| C(7)  | 25(1)    | 22(1)    | 22(1)    | 0(1)     | 5(1)     | -4(1)    |
| C(8)  | 28(1)    | 37(1)    | 32(1)    | 7(1)     | 11(1)    | 4(1)     |
| C(9)  | 42(1)    | 40(1)    | 29(1)    | 8(1)     | 15(1)    | -2(1)    |
| C(10) | 44(1)    | 24(1)    | 28(1)    | 6(1)     | 2(1)     | 0(1)     |
| C(11) | 34(1)    | 26(1)    | 39(1)    | 3(1)     | 5(1)     | 6(1)     |
| C(12) | 28(1)    | 29(1)    | 30(1)    | 2(1)     | 11(1)    | 0(1)     |
| C(13) | 25(1)    | 18(1)    | 21(1)    | 2(1)     | 5(1)     | 3(1)     |
| C(16) | 29(1)    | 28(1)    | 33(1)    | 4(1)     | 10(1)    | -6(1)    |
| C(17) | 36(1)    | 37(1)    | 42(1)    | 5(1)     | 2(1)     | -12(1)   |
| C(18) | 23(1)    | 20(1)    | 17(1)    | 4(1)     | 5(1)     | -1(1)    |

|       |       |       |       |       |       |        |
|-------|-------|-------|-------|-------|-------|--------|
| C(19) | 23(1) | 26(1) | 23(1) | 5(1)  | 4(1)  | 1(1)   |
| C(20) | 29(1) | 32(1) | 24(1) | 4(1)  | -3(1) | -8(1)  |
| C(21) | 37(1) | 32(1) | 24(1) | -8(1) | 6(1)  | -9(1)  |
| C(22) | 30(1) | 30(1) | 32(1) | -8(1) | 9(1)  | 1(1)   |
| C(23) | 22(1) | 27(1) | 25(1) | -2(1) | 2(1)  | -1(1)  |
| N(1)  | 36(1) | 26(1) | 19(1) | 0(1)  | 13(1) | 1(1)   |
| O(14) | 40(1) | 31(1) | 20(1) | -3(1) | 13(1) | -7(1)  |
| O(15) | 32(1) | 34(1) | 23(1) | -1(1) | 7(1)  | -12(1) |

Table 5.

Hydrogen bonds for **4h** [Å and

| D-H...A             | d(D-H) | d(H...A) | d(D...A)   | <(DHA) |
|---------------------|--------|----------|------------|--------|
| N(1)-H(1)...O(14)#1 | 0.88   | 1.98     | 2.8498(13) | 168.5  |

Symmetry transformations used to generate equivalent atoms:

#1 x-1/2,-y+1/2,z+1/2

### Compound 4i

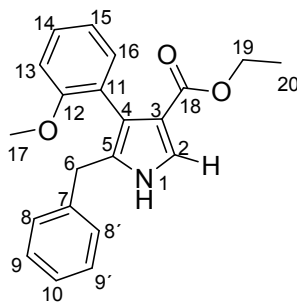

#### Ethyl 5-benzyl-4-(2-methoxyphenyl)-1H-pyrrole-3-carboxylate (**4i**).

Yield: 48%; brown solid; mp: 190-192 °C. IR ( $\nu$  cm<sup>-1</sup>) 3304 (N-H), 1683 (C=O). <sup>1</sup>H NMR (400 MHz, CDCl<sub>3</sub>)  $\delta$ : 8.29 (s, 1H, 1-H), 7.38-6.93 (m, 9H, H-8,8',9,9',10, H-13 to H-16), 4.06 (q, <sup>3</sup>J<sub>H-H</sub> = 7.0 Hz, 2H, H-19), 3.80 (d, <sup>3</sup>J<sub>H-H</sub> = 5.2 Hz, 2H, H-6), 3.71 (s, 3H, H-17), 1.07 (t, <sup>3</sup>J<sub>H-H</sub> = 7.0 Hz, 3H, H-20). <sup>13</sup>C NMR (100 MHz, CDCl<sub>3</sub>)  $\delta$ : 165.1 (C-18), 157.7 (C-12), 139.1 (C-7), 129.4 (C-5), 128.7 (C-8), 128.6 (C-6), 126.4 (C-10), 124.1 (C-4), 123.2 (C-2),

118.6 (C-14), 115.6 (C-3), 59.3 (C-19), 55.3 (C-17), 32.0 (C-6), 14.0 (C-20). HRMS (ESI<sup>+</sup>):  
m/z calcd for C<sub>21</sub>H<sub>21</sub>NO<sub>3</sub> [M+Na]<sup>+</sup> 358.1419, found 358.1441.

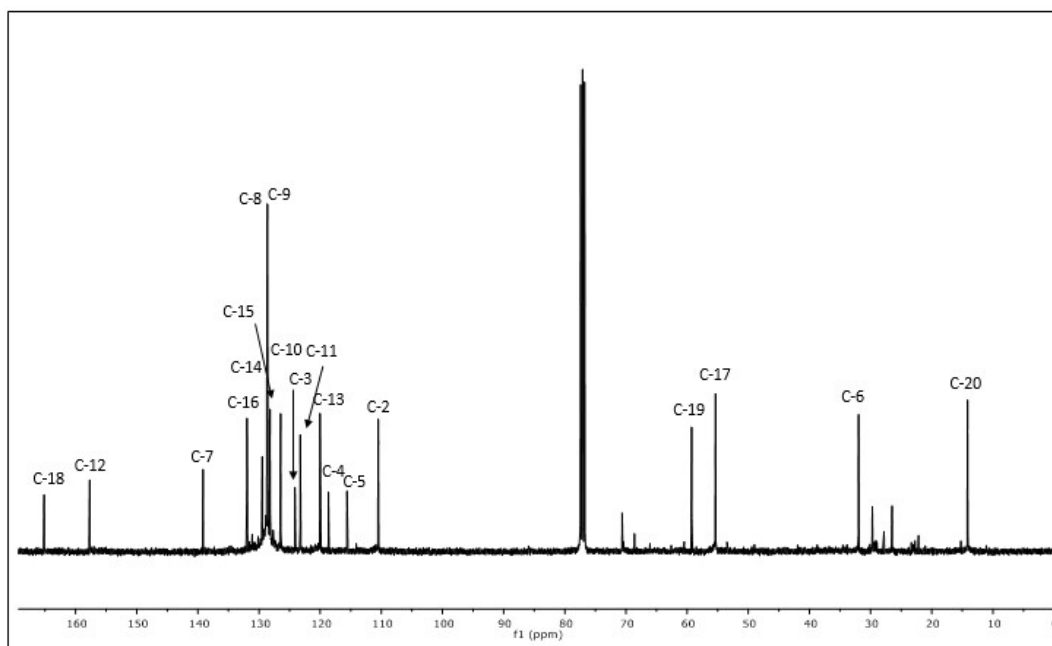

**4i NMR <sup>13</sup>C (CDCl<sub>3</sub>, 125 MHz).**

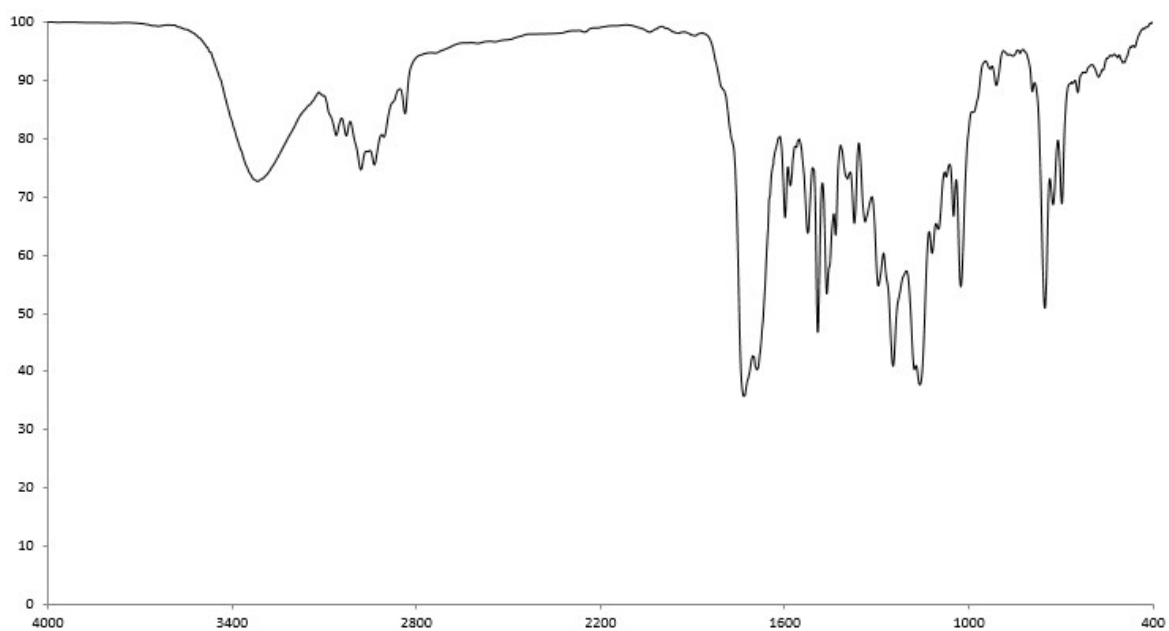

**4i IR-KBr pellet.**

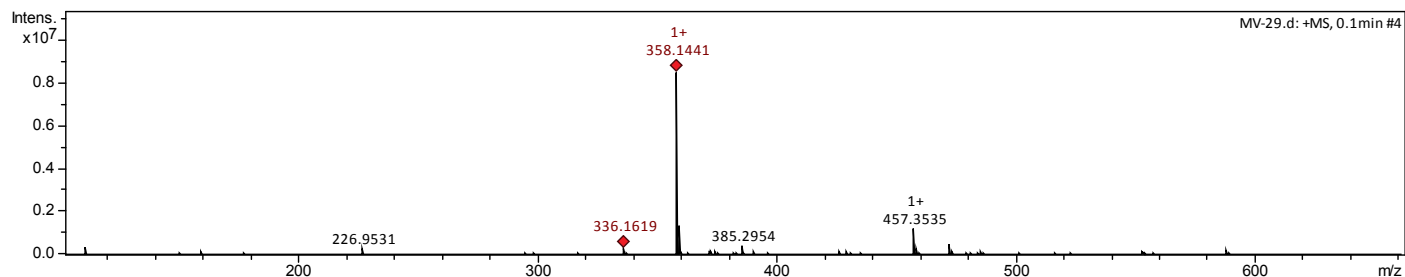

**4i HRMS.**

### Compound 4j

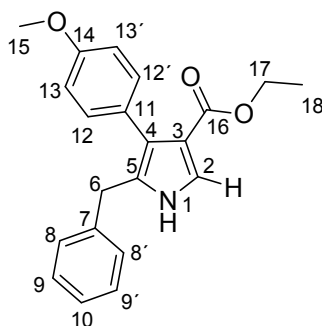

**Ethyl 5-benzyl-4-(4-methoxyphenyl)-1H-pyrrole-3-carboxylate (4j).** Yield: 32%; white solid; mp: 192-193 °C. IR ( $\nu$   $\text{cm}^{-1}$ ) 3304 (N-H), 1683 (C=O).  $^1\text{H}$  NMR (500 MHz,  $\text{CDCl}_3$ )  $\delta$ : 8.20 (s, 1H, H-1), 7.26 (s, 1H, H-2), 7.21-7.13 (m, 5H, H-8-10), 7.03 (d,  $^3J_{\text{H-H}} = 10.0$  Hz, 2H, H-12), 6.83 (d,  $^3J_{\text{H-H}} = 10.0$  Hz, 2H, H-13), 4.05 (q,  $^3J_{\text{H-H}} = 10.0$  Hz, 2H, H-17), 3.79 (s, 2H, H-6), 3.73 (s, 3H, H-15), 1.09 (t,  $^3J_{\text{H-H}} = 10.0$  Hz, 3H, H-18).  $^{13}\text{C}$  NMR (100 MHz,  $\text{CDCl}_3$ )  $\delta$ : 164.9 (C-16), 158.2 (C-14), 139.0 (C-7), 131.4 (C-12), 128.9 (C-5), 128.6 (C-8), 128.4 (C-9), 127.1 (C-11), 126.5 (C-10), 123.4 (C-2), 122.7 (C-4), 114.6 (C-3), 113.0 (C-13), 59.3 (C-17), 55.1 (C-15), 31.7 (C-6), 14.2 (C-18). HRMS (ESI $^+$ ): m/z calcd for  $\text{C}_{21}\text{H}_{21}\text{NO}_3$  [M+Na] $^+$  358.1419, found 358.1440.



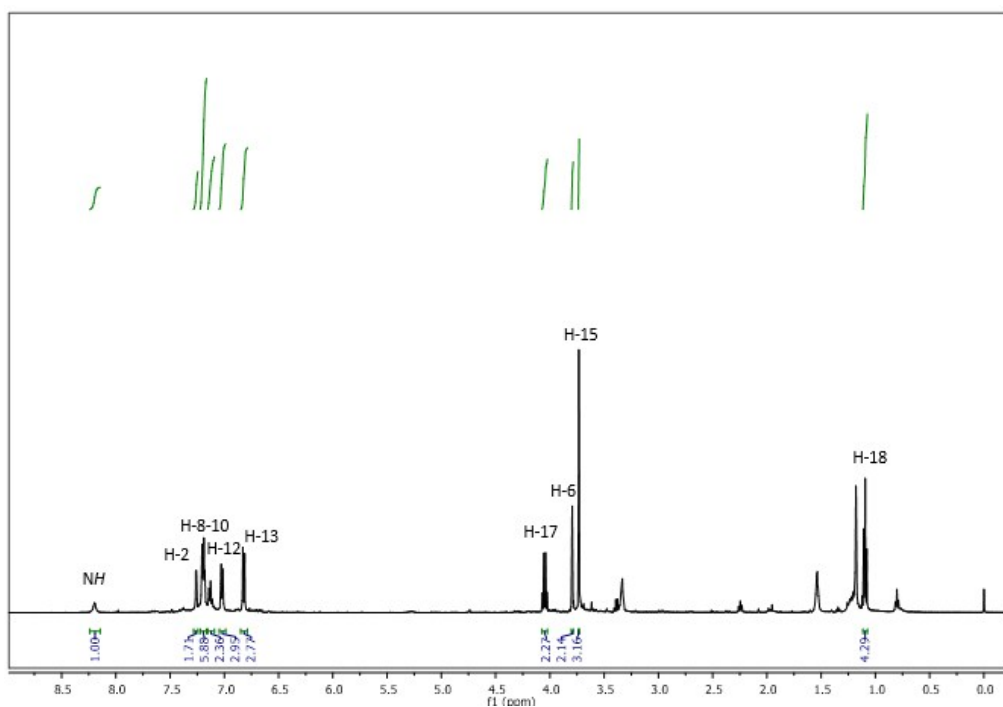

**4j NMR <sup>1</sup>H (CDCl<sub>3</sub>, 500 MHz).**

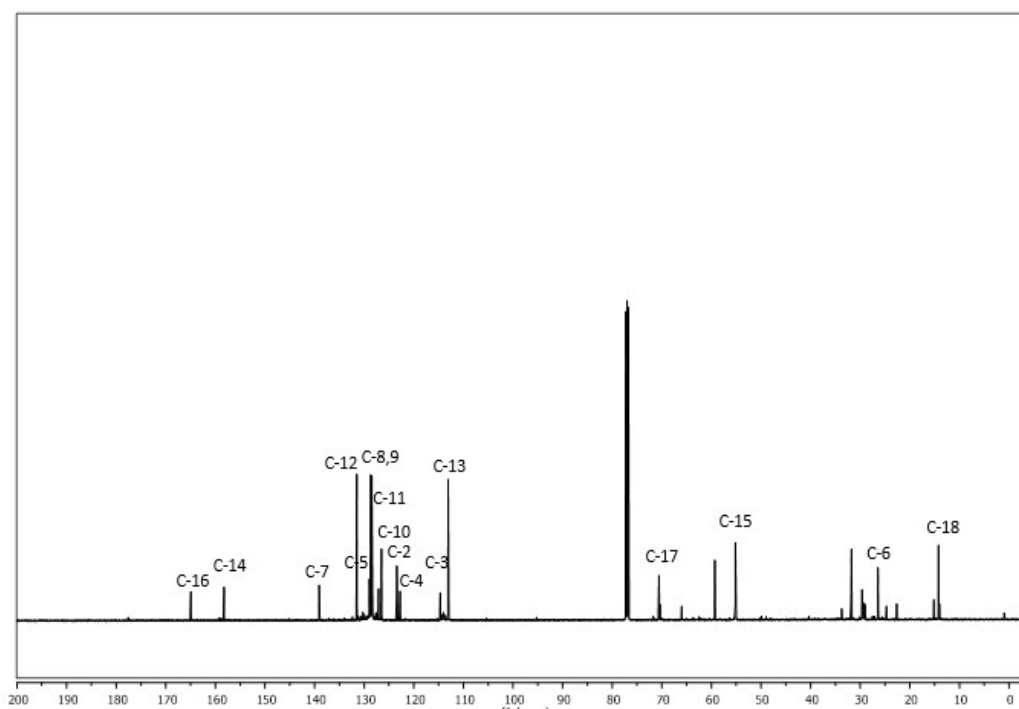

**4j NMR <sup>13</sup>C (CDCl<sub>3</sub>, 125 MHz).**

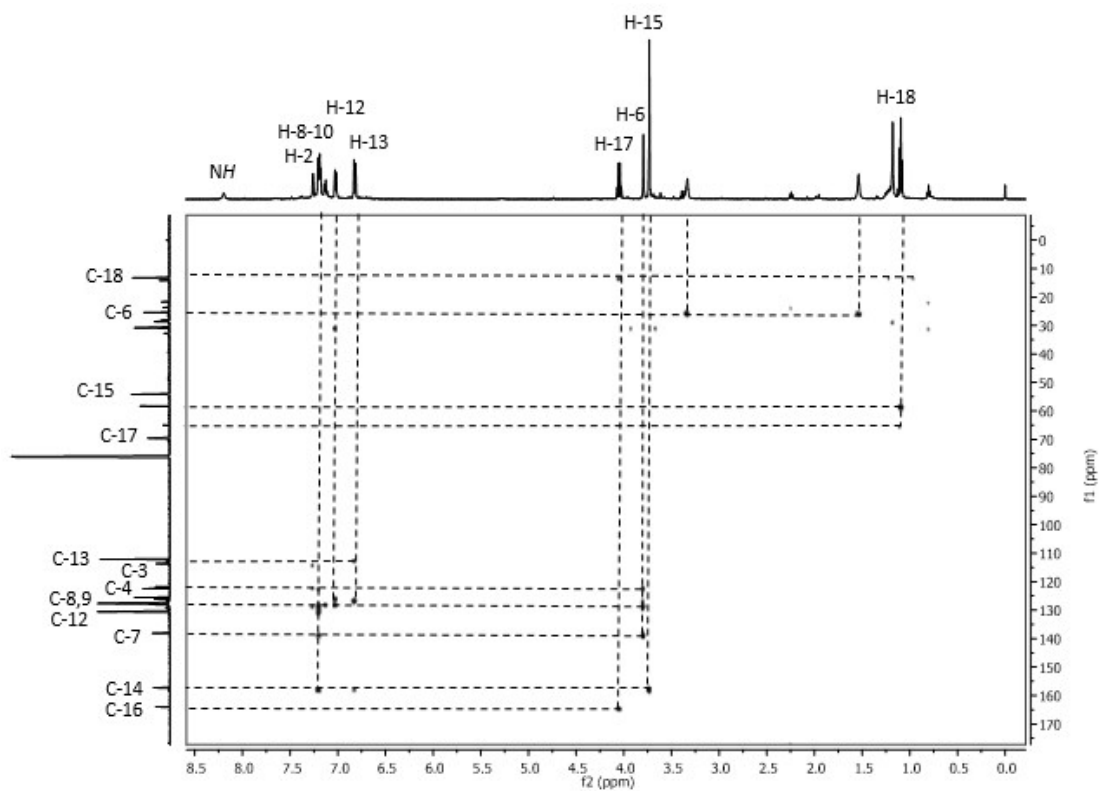

**4j NMR-HMBC ( $\text{CDCl}_3$ , 500 MHz).**

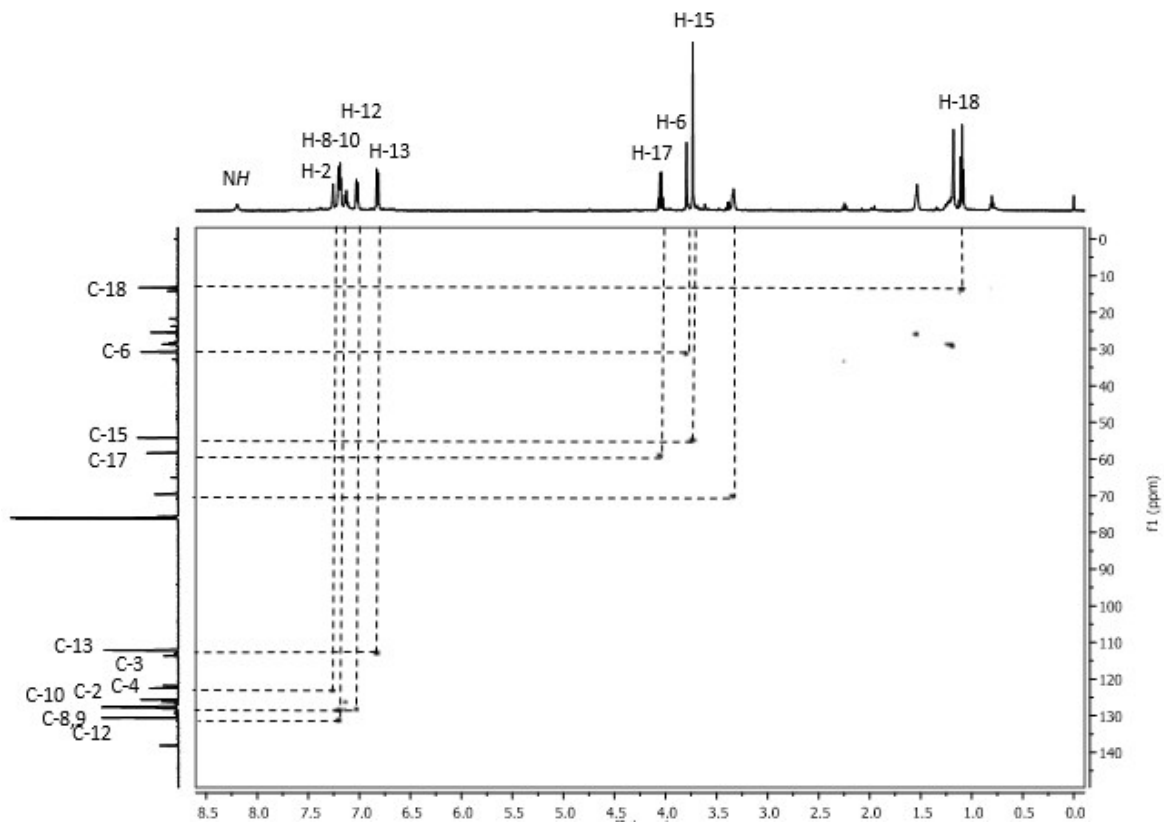

**4j NMR-HSQC (CDCl<sub>3</sub>, 500 MHz).**

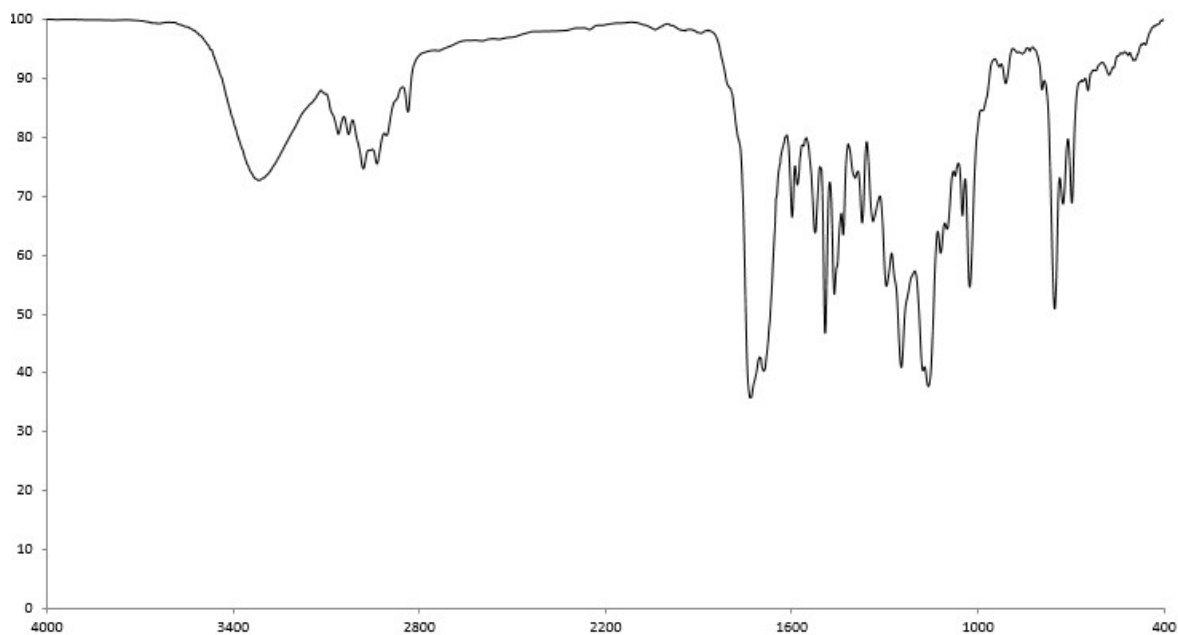

**4j IR-KBr pellet.**

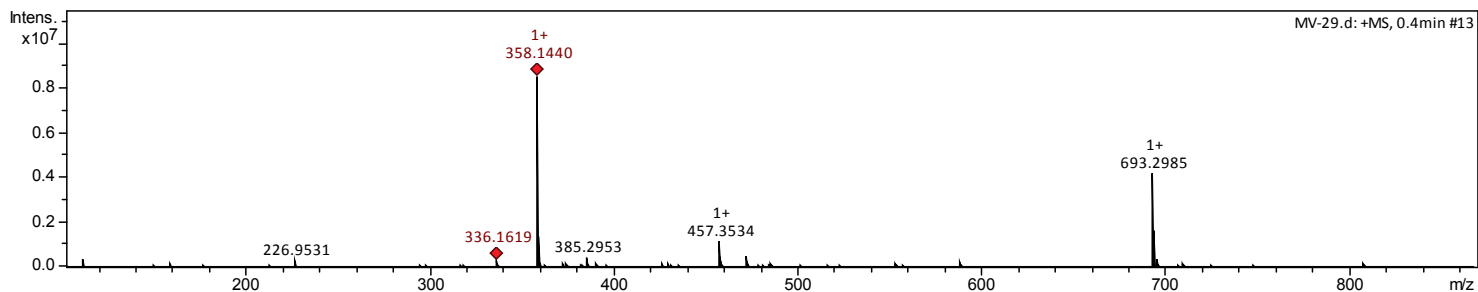

**4j HRMS.**

### Compound 4k.

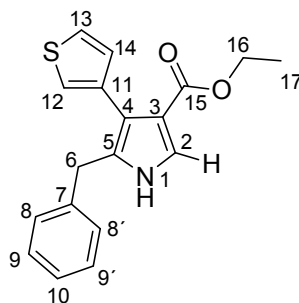

#### **Ethyl 5-benzyl-4-(thiophen-3-yl)-1H-pyrrole-3-carboxylate (4k).**

Yield: 45%; white solid; mp: 178-179 °C.  $^1\text{H}$  NMR (500 MHz,  $\text{CDCl}_3$ )  $\delta$ : 8.06 (s, 1H, H-1), 7.29 (s, 1H, H-2), 7.27-7.17 (m, 6H, H-7, H-8, H-9 and H-14), 7.10 (dd,  $^2J_{\text{H-H}} = 1.0$  Hz, 1H, H-12), 7.05 (dd,  $^2J_{\text{H-H}} = 1.0$  Hz, H-13), 4.10 (q,  $^3J_{\text{H-H}} = 10.0$  Hz, 2H, H-16), 3.88 (s, 2H, H-6), 3.79 (s, 2H, H-6), 1.14 (t,  $^3J_{\text{H-H}} = 10.0$  Hz, 3H, H-17).  $^{13}\text{C}$  NMR (100 MHz,  $\text{CDCl}_3$ )  $\delta$ : 164.9 (C-15), 158.2 (C-14), 139.0 (C-7), 131.4 (C-12), 128.9 (C-5), 128.6 (C-8), 128.4 (C-9), 127.1 (C-11), 126.5 (C-10), 123.4 (C-2), 122.7 (C-4), 114.6 (C-3), 113.0 (C-13), 59.3 (C-17), 55.1 (C-15), 31.7 (C-6), 14.2 (C-17). HRMS (ESI $^+$ ): m/z calcd for  $\text{C}_{18}\text{H}_{17}\text{NO}_2\text{S}$  [ $\text{M}+\text{Na}$ ] $^+$  334.0878, found 334.0901.

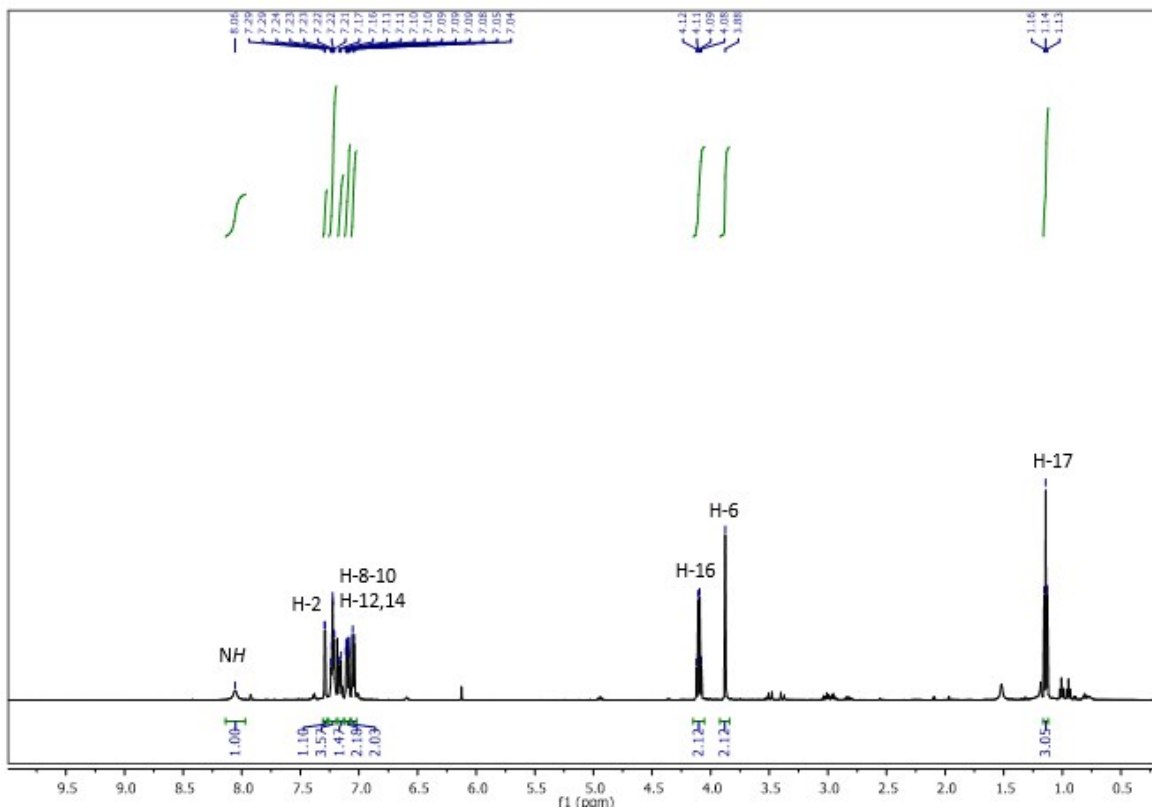

4k NMR <sup>1</sup>H (CDCl<sub>3</sub>, 500 MHz).

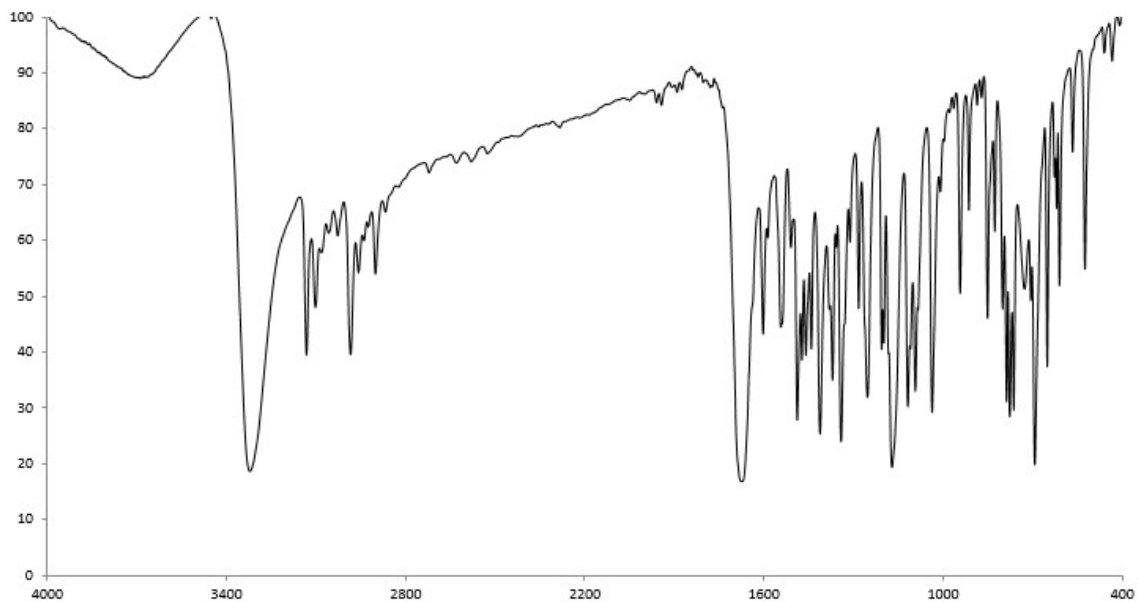

4k IR-KBr pellet.

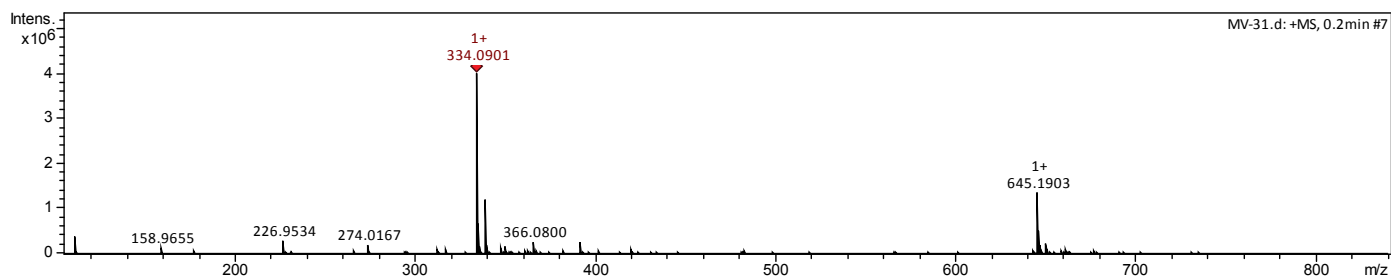

4k HRMS.

**Compound 4l.**

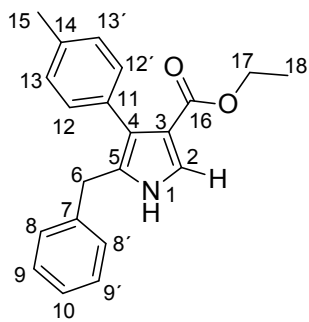

**Ethyl 5-benzyl-4-(*p*-tolyl)-1*H*-pyrrole-3-carboxylate (4I).** Yield: 60%; white solid; mp: 206-208 °C; IR ( $\nu$  cm<sup>-1</sup>) 3335 (N-H), 1693 (C=O). <sup>1</sup>H NMR (500 MHz, CDCl<sub>3</sub>),  $\delta$ : 7.99 (s, 1H, H-1), 7.27 (s, 1H, H-2), 7.23-7.14 (m, 5H, H-8-10), 7.10 (d, <sup>3</sup>*J*<sub>H-H</sub> = 5.0 Hz, 2H, H-12), 7.05 (d, <sup>3</sup>*J*<sub>H-H</sub> = 5.0 Hz, 2H, H-13), 4.07 (c, <sup>3</sup>*J*<sub>H-H</sub> = 5.0 Hz, 2H, H-17), 3.82 (s, 2H, H-6), 2.29 (s, 3H, H-15), 1.10 (t, <sup>3</sup>*J*<sub>H-H</sub> = 10.0 Hz, 3H, H-18). <sup>13</sup>C NMR (125 MHz, CDCl<sub>3</sub>)  $\delta$ : 164.8 (C-16), 139.1 (C-7), 135.8 (C-14), 131.7 (C-11), 130.3 (C-13), 128.9 (C-10), 128.6 (C-8), 128.4 (C-9), 128.3 (C-12), 126.5 (C-2), 123.4 (C-5), 123.1 (C-4), 114.6 (C-3), 59.2 (C-17), 31.7 (C-6), 21.1 (C-15), 14.2 (C-18). HRMS (ESI<sup>+</sup>): *m/z* calcd for C<sub>21</sub>H<sub>21</sub>NO<sub>2</sub> [M+Na]<sup>+</sup> 342.1470, found 342.1491.

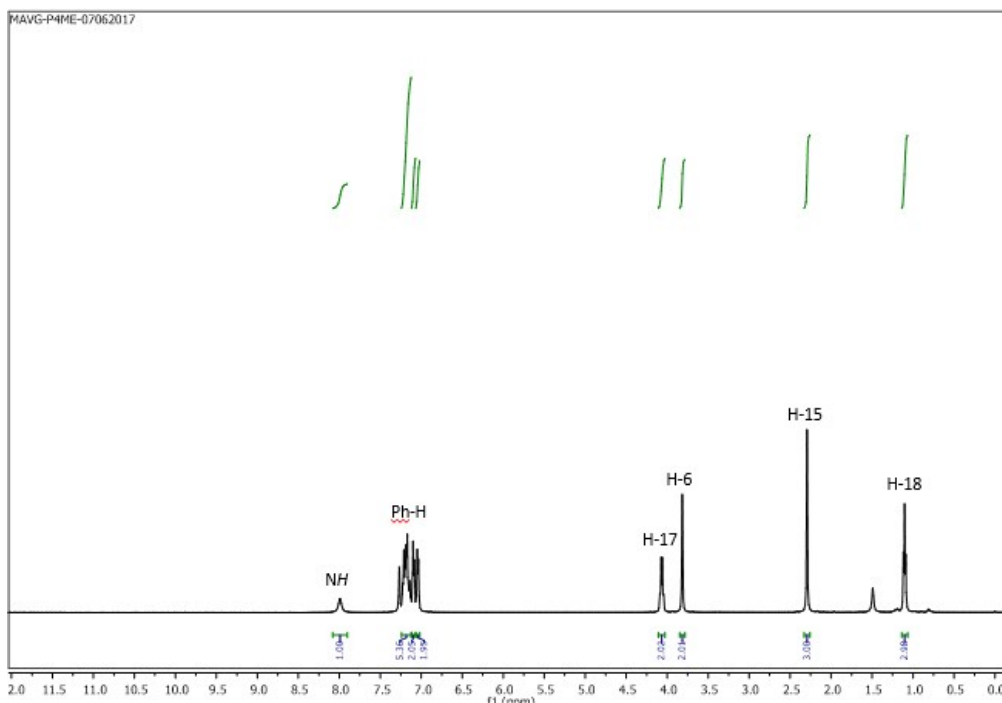

**4I NMR <sup>1</sup>H (CDCl<sub>3</sub>, 500 MHz).**

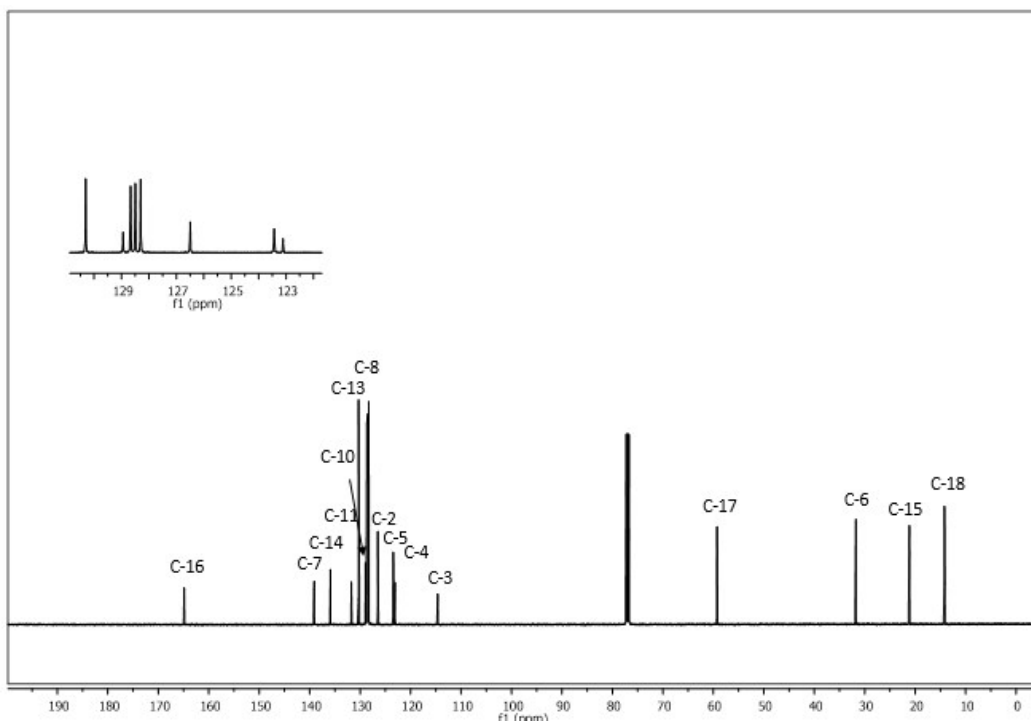

**41 NMR <sup>13</sup>C (CDCl<sub>3</sub>, 125 MHz).**

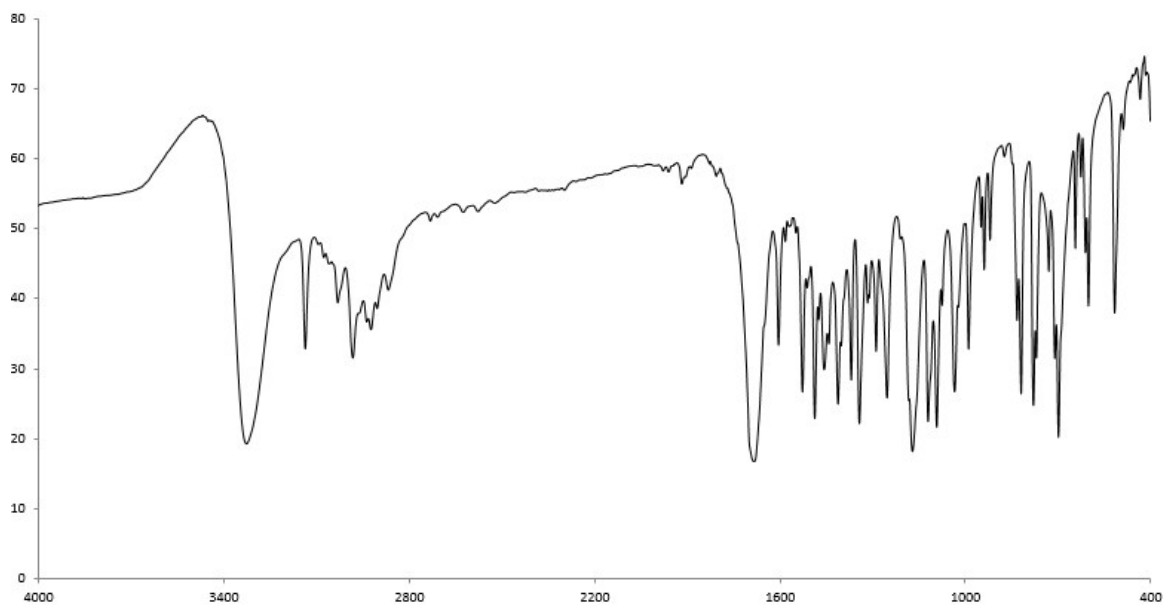

**41 IR-KBr pellet.**



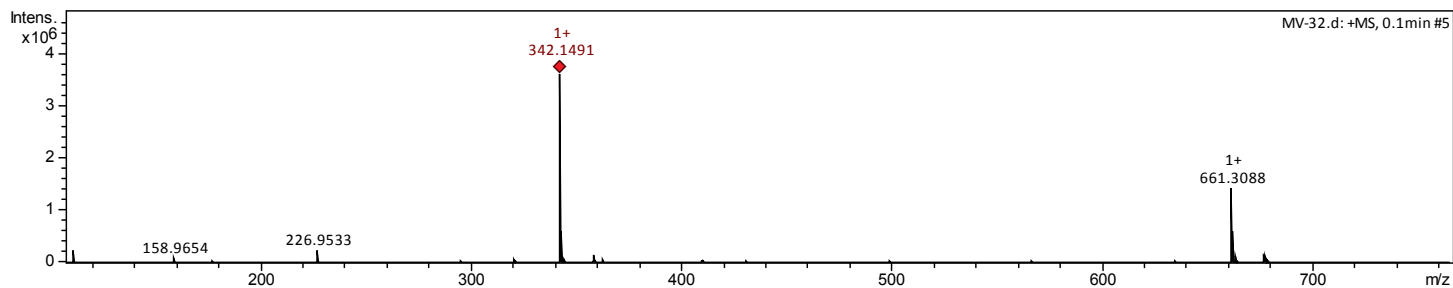

#### 4I HRSM

### Compound 4m

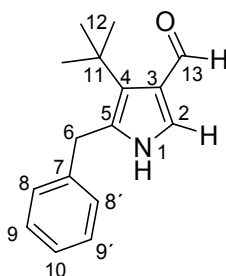

#### 5-benzyl-4-(*tert*-butyl)-1*H*-pyrrole-3-carbaldehyde (4m).

Yield: 38%; white solid.  $^1\text{H}$  NMR (500 MHz,  $\text{CDCl}_3$ )  $\delta$ : 9.95 (s, 1H, H-13), 8.53 (s, 1H, H-1), 7.20-7.04 (m, 5H, H-2,8,9,10), 4.17 (s, 2H, H-6), 0.17 (s, 9H, H-12).  $^{13}\text{C}$  NMR (125 MHz,  $\text{CDCl}_3$ )  $\delta$ : 187.0 (C-13), 141.2 (C-7), 136.1 (C-5), 129.2 (C-8), 128.9 (C-9), 127.4 (C-10), 127.2 (C-2), 126.0 (C-4), 128.3 (C-12), 126.5 (C-2), 123.4 (C-5), 123.1 (C-4), 125.0 (C-3), 32.9 (C-6), 0.90 (C-11), 0.89 (C-12). HRMS (ESI<sup>+</sup>):  $m/z$  calcd for  $\text{C}_{18}\text{H}_{23}\text{NO}_2$   $[\text{M}+\text{Na}]^+$  308.1626, found 308.1621

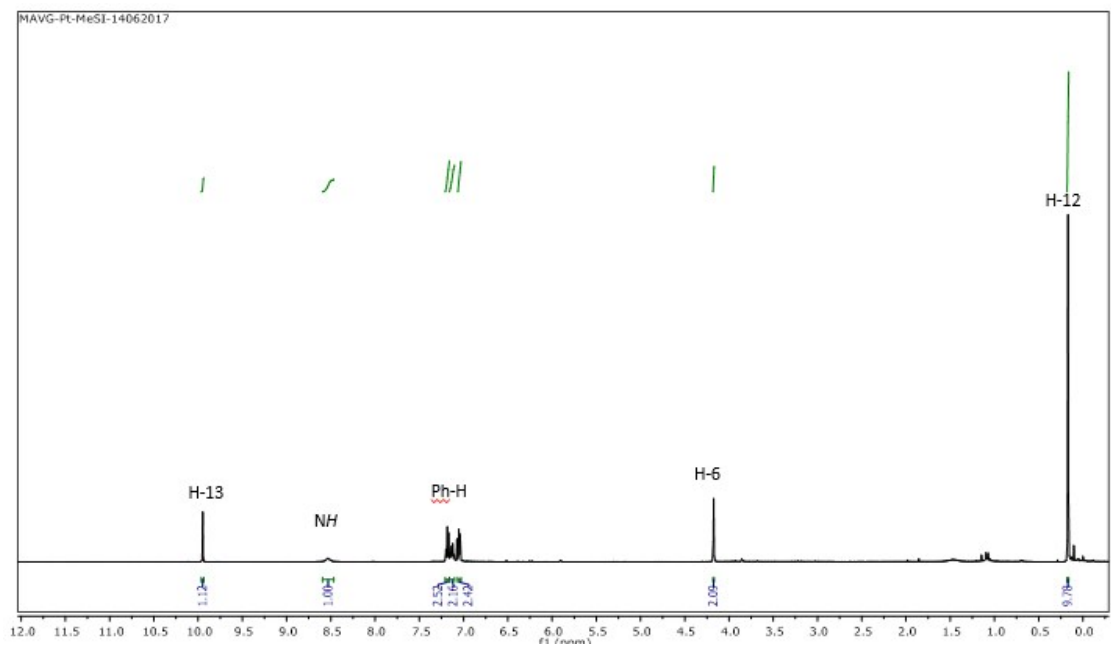

**4m NMR  $^1\text{H}$  ( $\text{CDCl}_3$ , 500 MHz).**

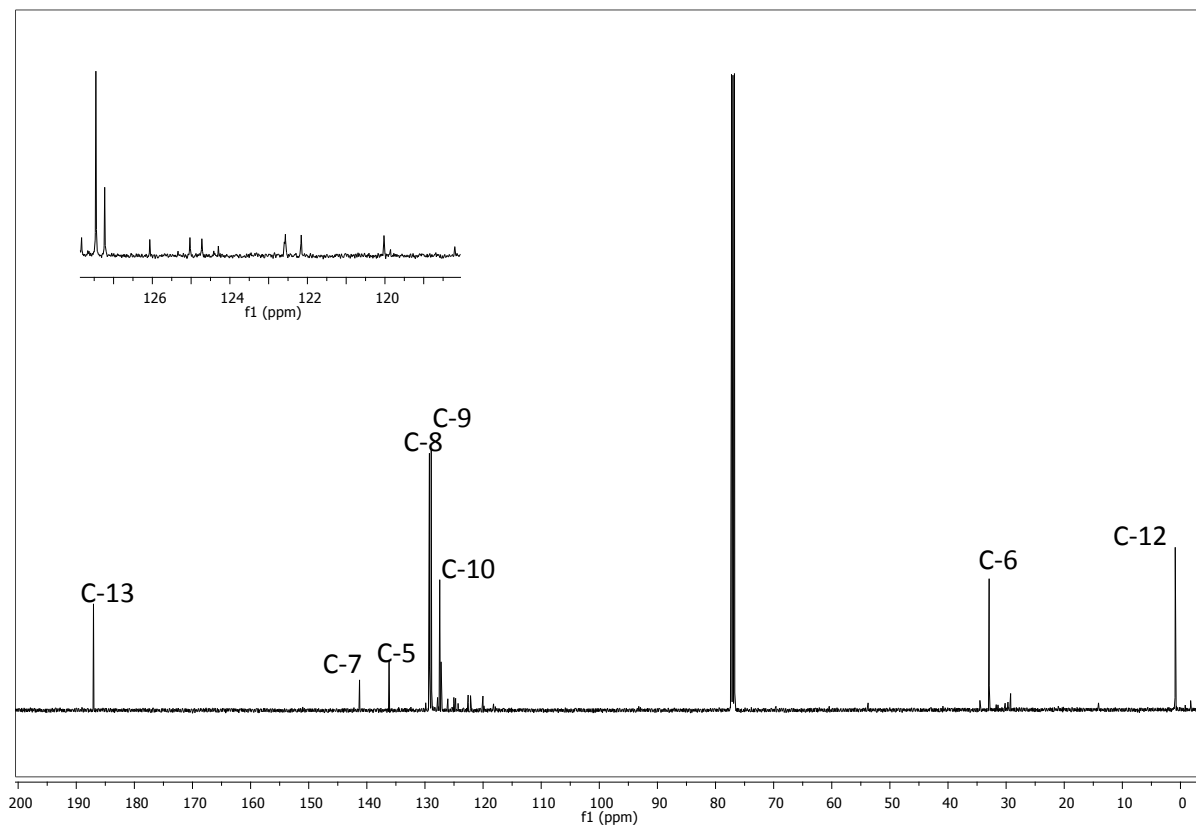

**4m NMR  $^{13}\text{C}$  ( $\text{CDCl}_3$ , 125 MHz).**

## Compound 4n.

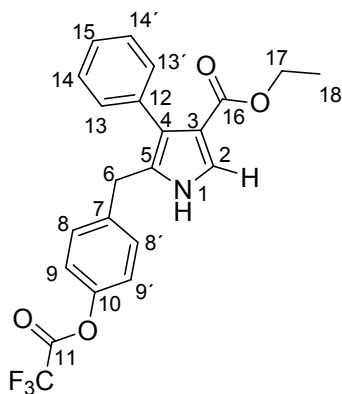

### Ethyl 4-phenyl-5-(4-(2,2,2-trifluoroacetoxy)benzyl)-1H-pyrrole-3-carboxylate (4n).

Yield: 45%; white solid; mp: 205-206 °C.  $^1\text{H}$  NMR (500 MHz,  $\text{CDCl}_3$ )  $\delta$ : 8.47 (s, 1H, H-1), 7.22-7.14 (m, 6H, H-2,13-15), 6.77 (d,  $^3J_{\text{H-H}} = 5.0$  Hz, 2H, H-9), 6.57 (d,  $^3J_{\text{H-H}} = 10.0$  Hz, 2H, H-8), 4.01 (m, 2H, H-17), 3.64 (s, 2H, H-6), 1.01 (t,  $^3J_{\text{H-H}} = 10.0$  Hz, 3H, H-18).  $^{13}\text{C}$  NMR (125 MHz,  $\text{CDCl}_3$ )  $\delta$ : 171.7 (C-11), 165.9 (C-16), 154.7 (C-10), 134.9 (C-7), 130.5 (C-12), 130.4 (C-8), 129.8 (C-15), 129.4 (C-13), 127.5 (C-5), 126.3 (C-2), 123.9 (C-4), 122.7 ( $\text{CF}_3$ ), 115.5 (C-9), 60.6 (C-17), 22.6 (C-6), 14.0 (C-18). HRMS (ESI $^+$ ):  $m/z$  calcd for  $\text{C}_{20}\text{H}_{22}\text{NNaO}_4$   $[\text{M}+\text{Na}]^+$  420.1399, found 420.1402

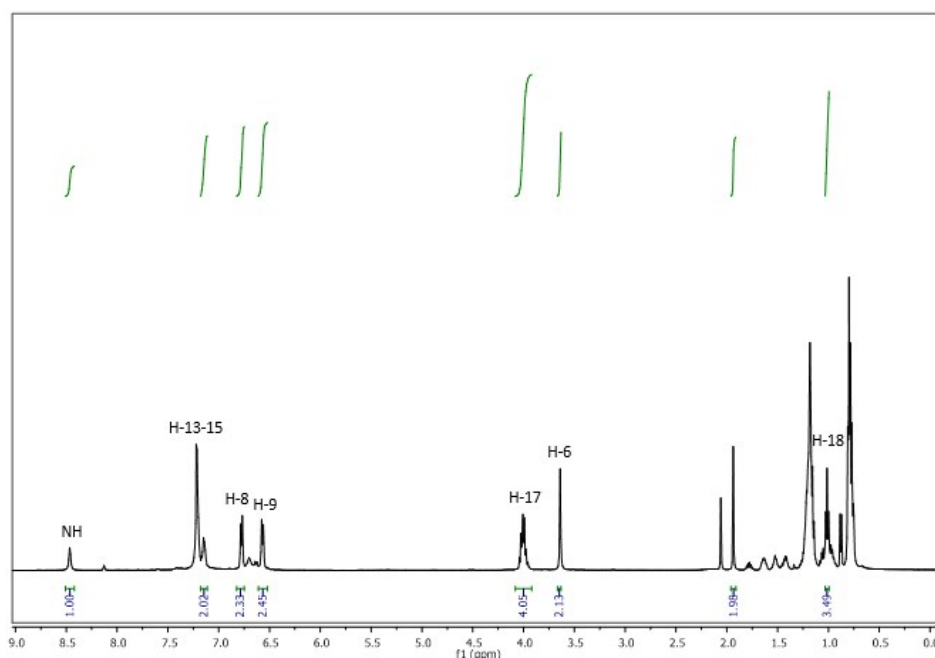

4n NMR  $^1\text{H}$  ( $\text{CDCl}_3$ , 500 MHz).

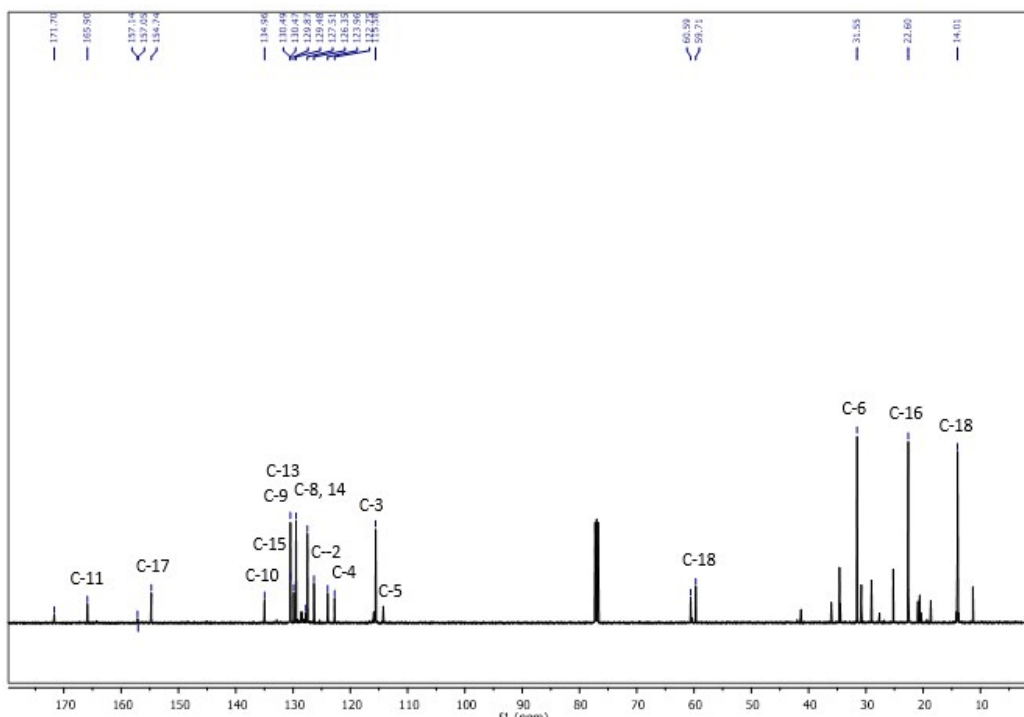

**4n** NMR  $^{13}\text{C}$  ( $\text{CDCl}_3$ , 125 MHz).

### Compound 4o.

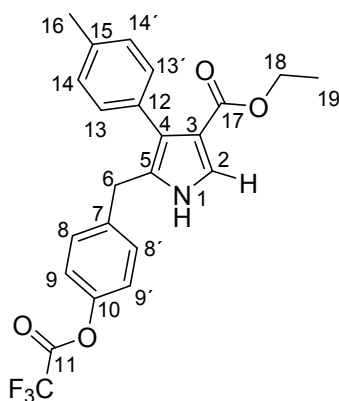

### Ethyl 4-(*p*-tolyl)-5-(4-(2,2,2-trifluoroacetoxy)benzyl)-1*H*-pyrrole-3-carboxylate (**4o**).

Yield: 30%; white solid; mp: 196-197 °C.  $^1\text{H}$  NMR (500 MHz,  $\text{CDCl}_3$ )  $\delta$ : 8.04 (s, 1H, H-1), 7.45 (d,  $^3J_{\text{H-H}} = 5.0$  Hz, 1H, H-2), 7.28 (d,  $^3J_{\text{H-H}} = 5.0$  Hz, 2H, H-13), 7.09 (d,  $^3J_{\text{H-H}} = 10.0$  Hz, 2H, H-9), 6.90 (d,  $^3J_{\text{H-H}} = 10.0$  Hz, 2H, H-14), 6.68 (d,  $^3J_{\text{H-H}} = 10.0$  Hz, 2H, H-9), 4.07 (q,  $^3J_{\text{H-H}} = 5.0$  Hz, 2H, H-18), 3.74 (s, 2H, H-6), 2.29 (s, 3H, H-16), 1.10 (t,  $^3J_{\text{H-H}} = 5.0$  Hz,

3H, H-19).  $^{13}\text{C}$  NMR (125 MHz,  $\text{CDCl}_3$ )  $\delta$ : 165.0 (C-11), 154.4 (C-17), 135.9 (C-10), 131.7 (C-7), 130.8 (C-15), 130.3 (C-8), 129.7 (C-12), 129.4 (C-13), 128.3 (C-5), 127.4 (C-9), 123.3 (C-4), 122.8 ( $\text{CF}_3$ ), 115.6 (C-3), 59.4 (C-18), 29.6 (C-6), 21.2 (C-16), 14.0 (C-19). HRMS (ESI $^+$ ): m/z calcd for  $\text{C}_{20}\text{H}_{19}\text{NO}_2$   $[\text{M}+\text{Na}]^+$  328.1313, found 328.1319.

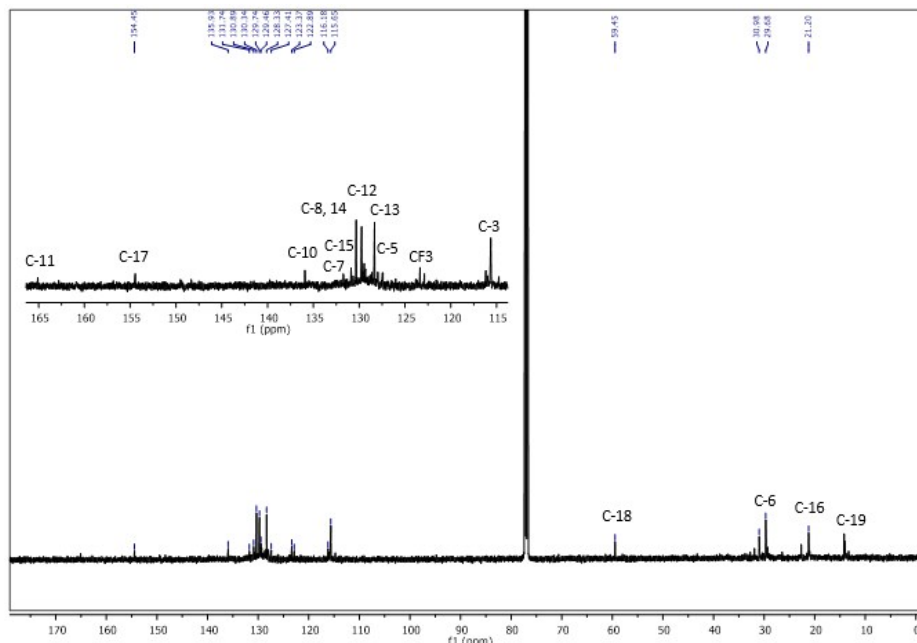

**4o NMR  $^{13}\text{C}$  ( $\text{CDCl}_3$ , 125 MHz).**

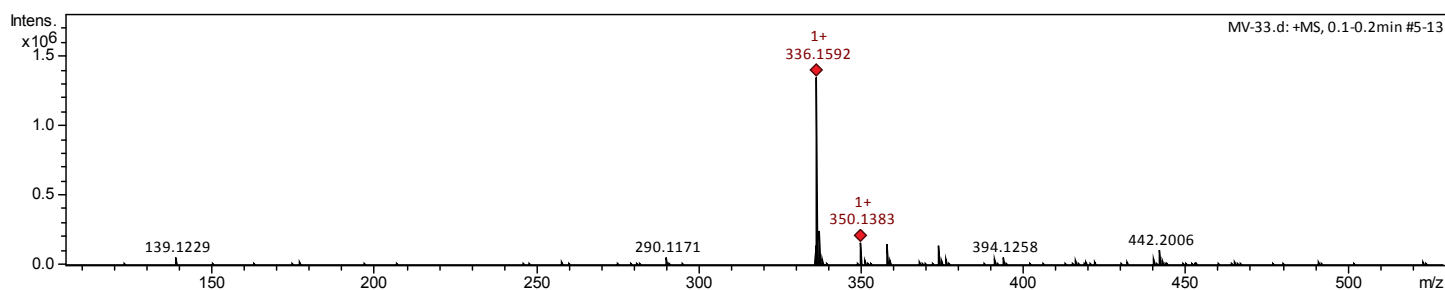

**4o HRMS.**

## Compound 4p

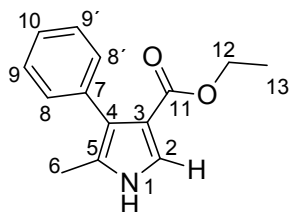

### Ethyl 5-methyl-4-phenyl-1H-pyrrole-3-carboxylate (4p).

Yield: 60%; white solid; mp: 134-138 °C. IR ( $\nu$   $\text{cm}^{-1}$ ) 3304 (N-H), 1683 (C=O).  $^1\text{H}$  NMR (500 MHz,  $\text{CDCl}_3$ )  $\delta$ : 8.22 (s, 1H, H-1), 7.29-7.19 (m, 6H, H-2,8-10), 4.08 (q,  $^3J_{\text{H-H}} = 10.0$  Hz, 2H, H-12), 2.11 (s, 3H, H-6), 1.09 (t,  $^3J_{\text{H-H}} = 5.0$  Hz, 3H, H-13).  $^{13}\text{C}$  NMR (125 MHz,  $\text{CDCl}_3$ )  $\delta$ : 164.9 (C-11), 135.2 (C-7), 130.4 (C-9), 127.4 (C-8), 126.1 (C-2), 122.7 (C-4), 122.3 (C-5), 123.3 (C-4), 114.8 (C-3), 59.7 (C-12), 14.0 (C-13), 11.4 (C-6).

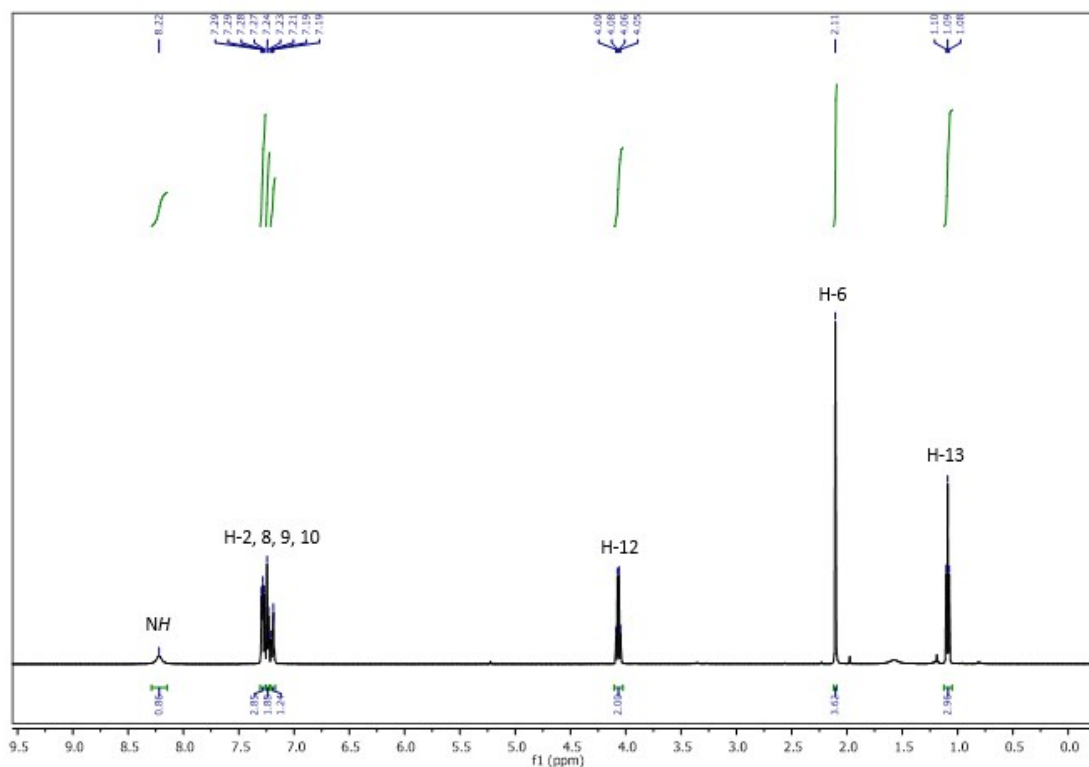

4p NMR  $^1\text{H}$  ( $\text{CDCl}_3$ , 500 MHz).

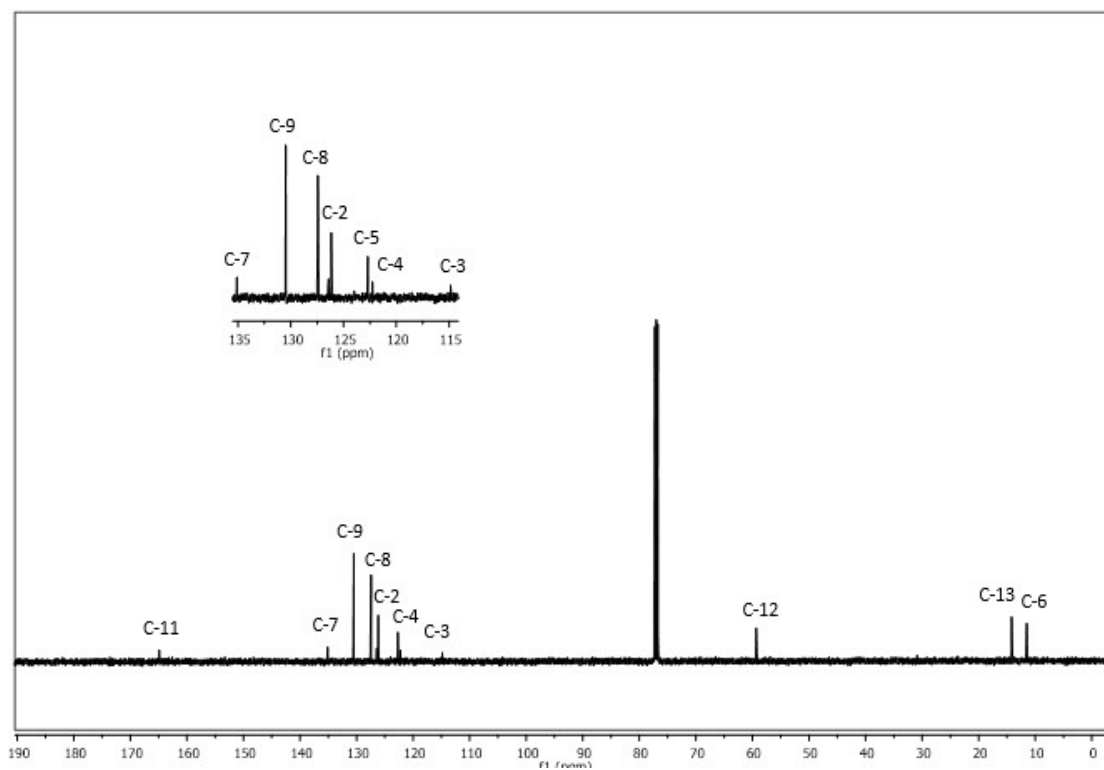

**4p** NMR  $^{13}\text{C}$  ( $\text{CDCl}_3$ , 125 MHz).

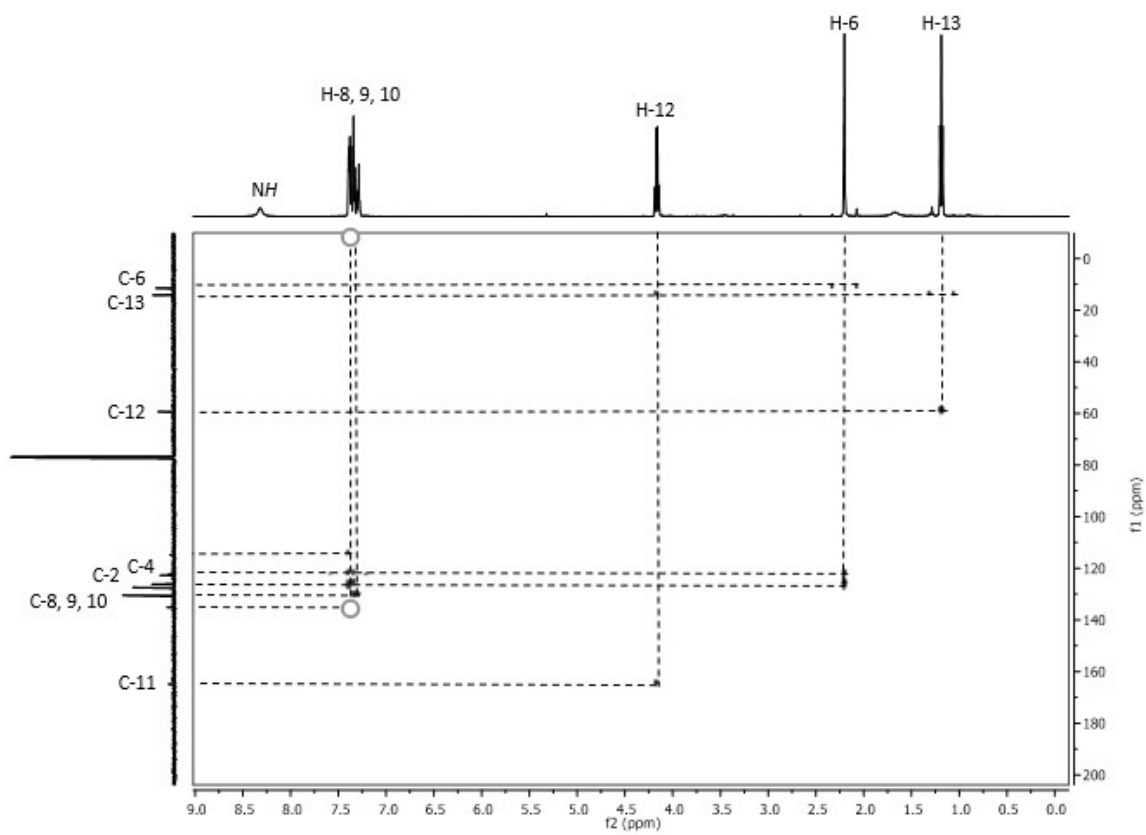

**4p** NMR-HMBC ( $\text{CDCl}_3$ ).

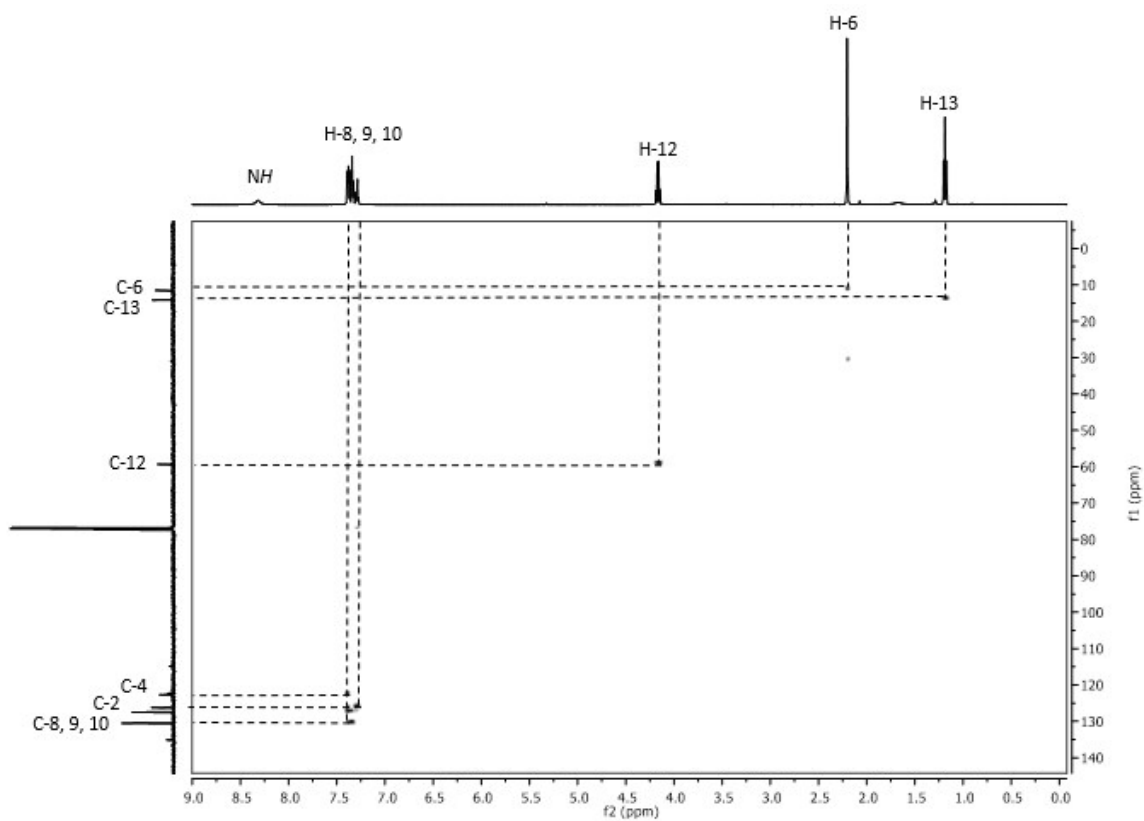

**4p NMR-HSQC (CDCl<sub>3</sub>).**

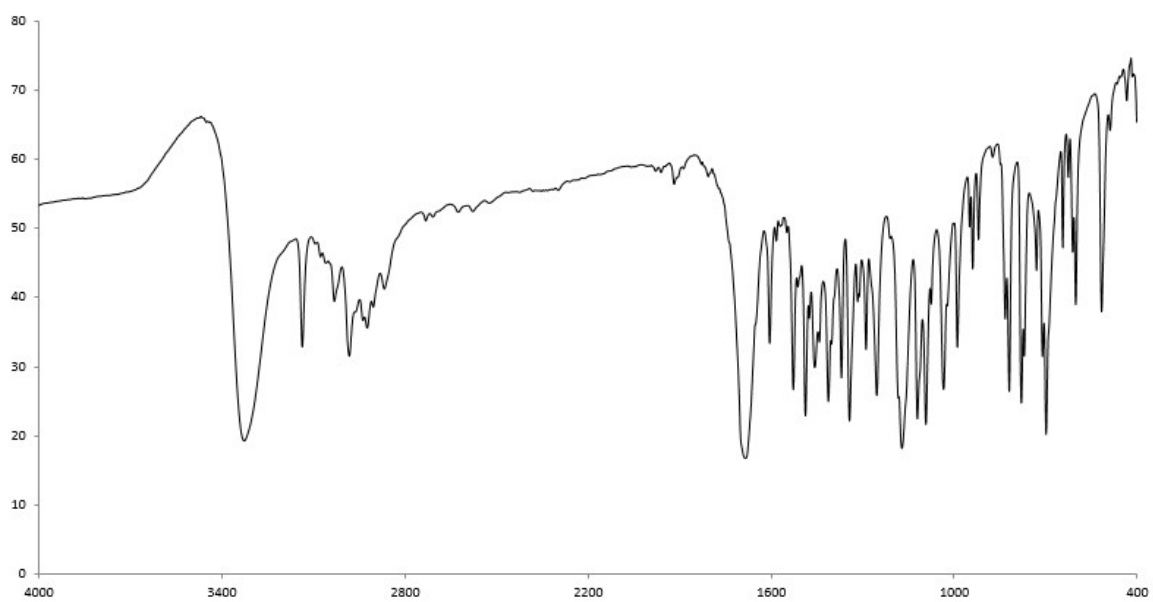

**4p IR-KBr pellet.**



## Compound 4q

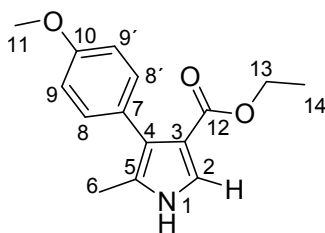

### Ethyl 4-(4-methoxyphenyl)-5-methyl-1H-pyrrole-3-carboxylate (4q).

Yield: 55%; white solid; mp: 116-119 °C.  $^1\text{H}$  NMR (500 MHz,  $\text{CDCl}_3$ )  $\delta$ : 8.61 (s, 1H, H-1), 7.15 (d,  $^3J_{\text{H-H}} = 10.0$  Hz, 2H, H-8), 7.07 (d,  $^3J_{\text{H-H}} = 10.0$  Hz, 2H, H-2), 6.82 (s, 1H, H-2), 4.05 (q,  $^3J_{\text{H-H}} = 10.0$  Hz, 2H, H-13), 3.74 (s, 3H, H-10'), 1.18 (t,  $^3J_{\text{H-H}} = 5.0$  Hz, 3H, H-14).  $^{13}\text{C}$  NMR (125 MHz,  $\text{CDCl}_3$ )  $\delta$ : 164.9 (C-12), 158.0 (C-10), 135.2 (C-7), 130.4 (C-9), 127.4 (C-8), 126.1 (C-2), 122.7 (C-7), 122.3 (C-5), 123.3 (C-5), 114.8 (C-3), 59.7 (C-12), 14.0 (C-13), 11.4 (C-6). HRMS (ESI<sup>+</sup>): m/z calcd for  $\text{C}_{15}\text{H}_{17}\text{NO}_3$  [M+Na]<sup>+</sup> 282.1106, found 282.1103.

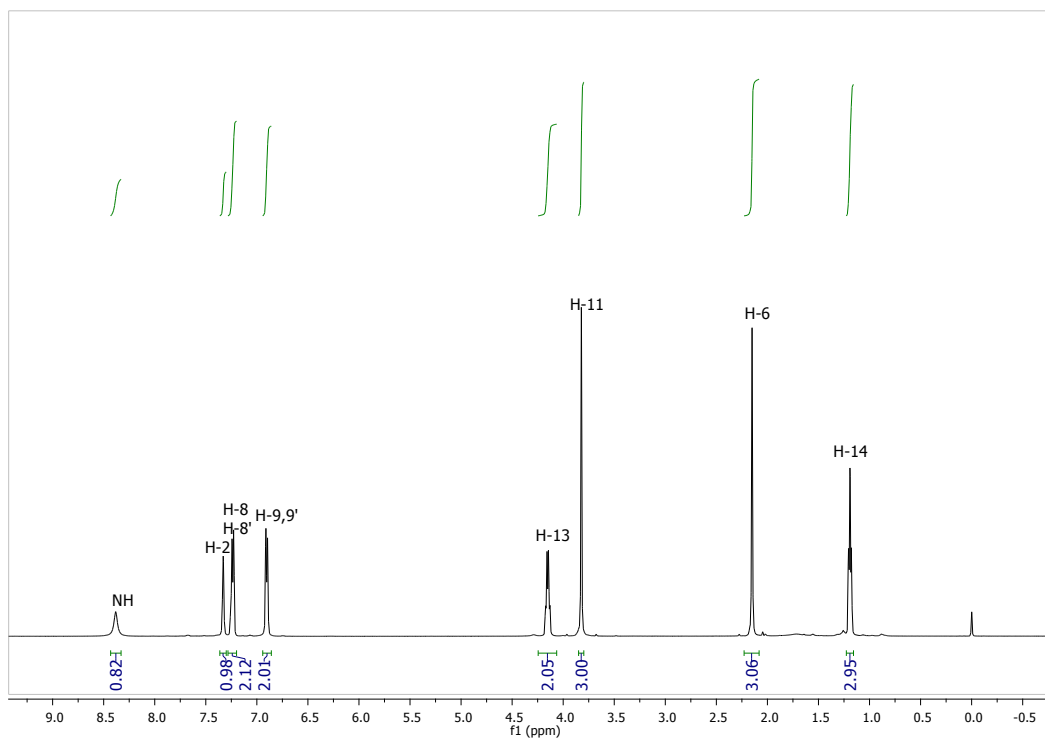

**4q NMR  $^1\text{H}$  ( $\text{CDCl}_3$ , 500 MHz).**

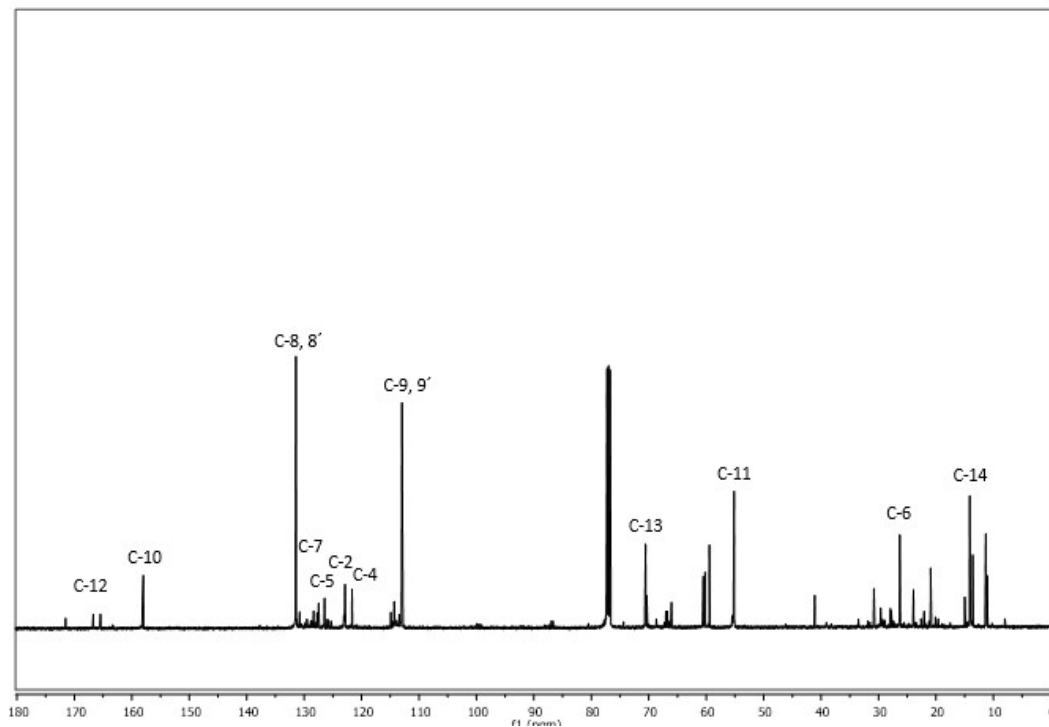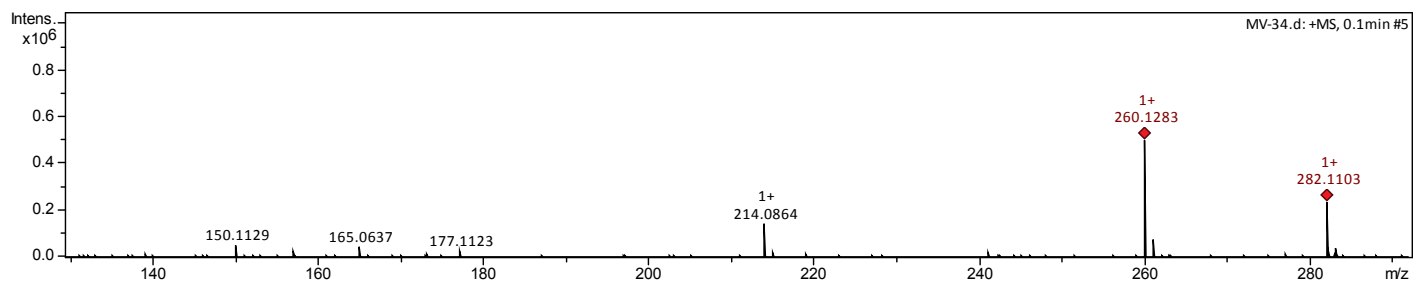

## Compound 5.

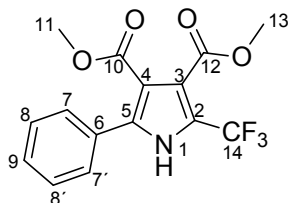

**Dimethyl-2-phenyl-5-(trifluoromethyl)-1H-pyrrole-3,4-dicarboxylate (5).** Yield: 40%; white solid;  $^1\text{H}$  NMR (400 MHz,  $\text{CDCl}_3$ )  $\delta$ : 9.75 (s, 1H, H-1), 7.46-7.35 (m, 5H, H-7, 7', H-8, 8' and H-9), 3.85 (s, 3H, H-11), 3.70 (s, 3H, H-13).  $^{13}\text{C}$  NMR (100 MHz,  $\text{CDCl}_3$ )  $\delta$ : 164.5 (C-13), 163.5 (C-11), 136.1 (C-6), 129.4 (C-9), 129.3 (C-8), 128.5 (C-7), 120.4 (q,  $^1J_{\text{C-F}} = 40.0$  Hz, C-2), 119.9 (q,  $^2J_{\text{C-F}} = 267.0$  Hz, C-14), 114.0 (C-3), 52.5 (C-11), 52.0 (C-13).

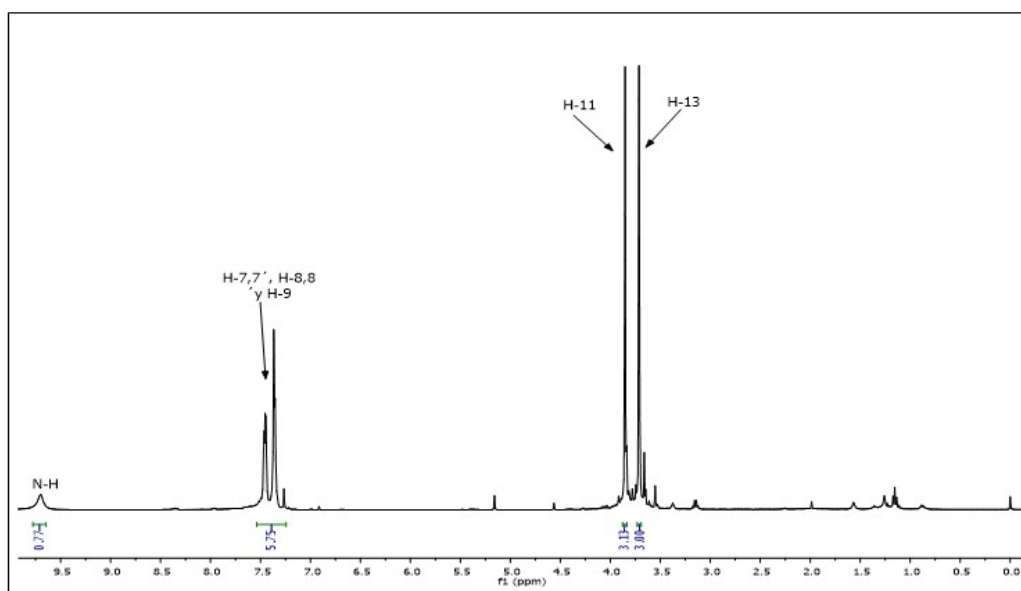

**5 NMR  $^1\text{H}$  ( $\text{CDCl}_3$ , 500 MHz).**

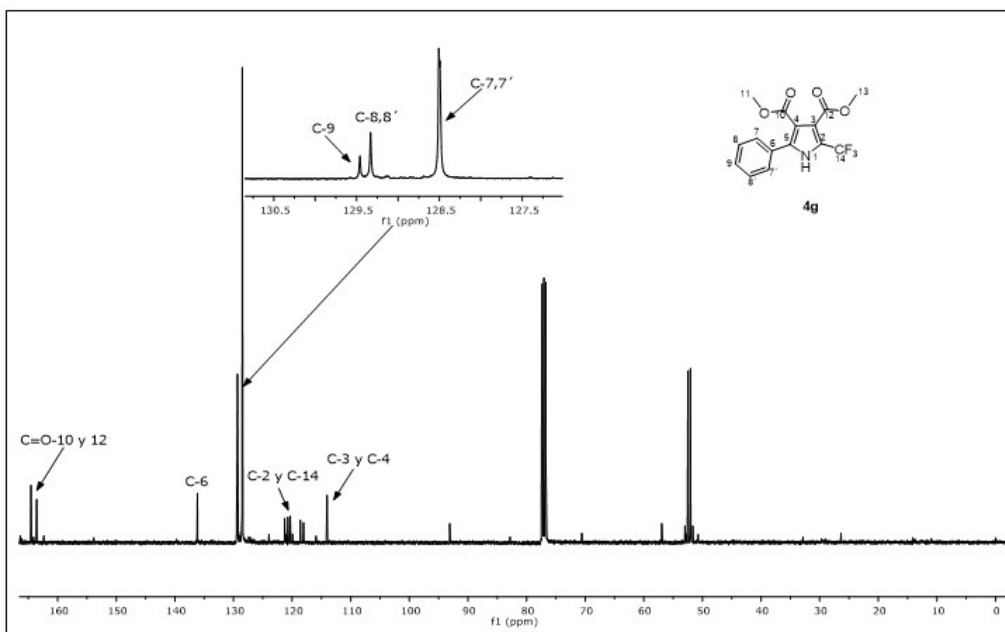

**5** NMR  $^{13}\text{C}$  ( $\text{CDCl}_3$ , 125 MHz).

## SECTION 4

### General procedure for the synthesis of compounds **6** and **7**

**Synthesis of bicyclic compounds **6** and **7**:** Following the general procedure for the synthesis of pyrroles **4**, compound **6** was obtained in the absence of a catalyst after 180 min of reaction when 1.0 mmol of **1h** and 2.1 mmol of oxazolone **2a** were combined. Compound **7** was isolated from the chloroform-based mixture of **6** stirred for 2 h at room temperature in presence of SiO<sub>2</sub>.

## Compound 6

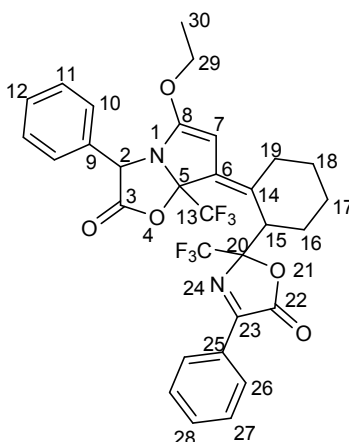

**(Z)-5-ethoxy-7-(2-(5-oxo-4-phenyl-2-(trifluoromethyl)-2,5-dihydrooxazol-2-yl)cyclohexylidene)-3-phenyl-7a-(trifluoromethyl)-7,7a-dihydropyrrolo[2,1-b]oxazol-2(3H)-one (6).** CCDC 1911540 Yield: 40%; yellow crystals; mp: 203-205 °C. <sup>1</sup>H NMR (500 MHz, CDCl<sub>3</sub>) δ: 8.47 (d, *J* = 5.0 Hz, 2H, H-26), 7.67-7.35 (m, 8H, H-27, 28, 10-12), 4.90 (s, 1H, H-2), 4.83 (s, 1H, H-7), 4.00-3.96 (q, *J* = 5.0 Hz, 2H, H-29), 2.29 (d, *J* = 10.0 Hz, 1H, H-15), 2.09-2.02 (m, 2H, H-19), 1.92-1.68 (m, 4H, H-16,17), 1.41-1.33 (m, 2H, H-18), 1.30 (t, *J* = 5.0 Hz, 3H, H-30). <sup>13</sup>C NMR (125 MHz, CDCl<sub>3</sub>) δ: 169.9 (C-3), 162.3 (C-22), 133.6 (C-8), 132.0 (C-23), 131.5 (C-14), 131.2 (C-6), 131.0 (C-9), [129.1, 129.0, 128.5, 128.4, 127.9, 127.6, 126.8 (C-Ph)], 126.8 (C-20), 82.5 (C-5), 66.7 (C-29), 61.7 (C-7), 30.8 (C-18), 30.1 (C-19), 27.7 (C-15), 26.2 (C-17), 22.0 (C-16), 14.2 (C-30).

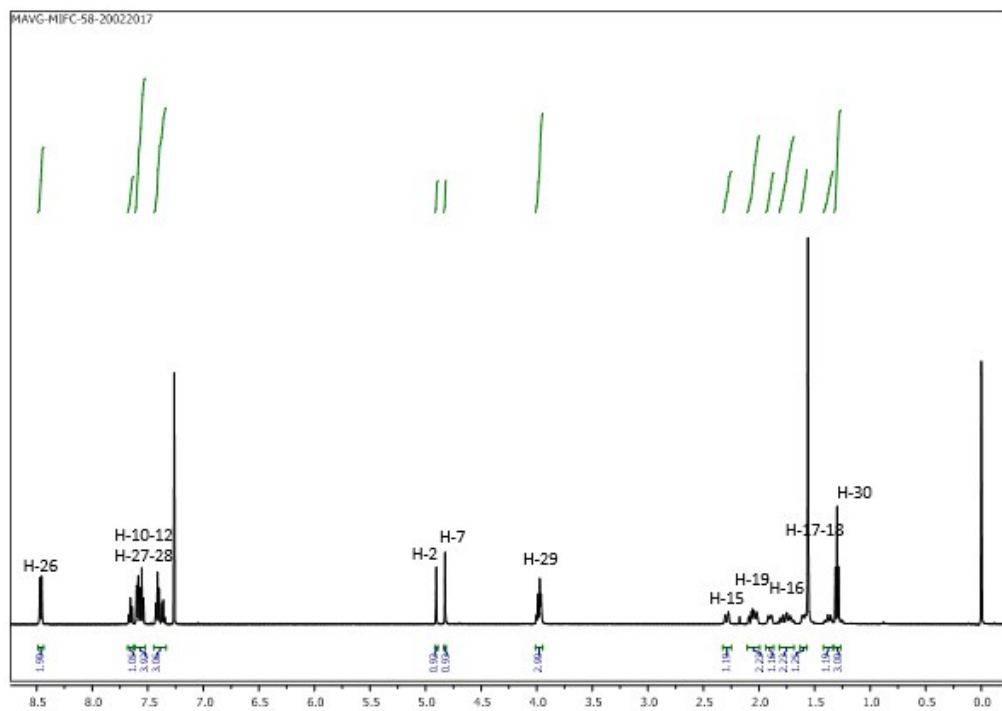

6 NMR <sup>1</sup>H (CDCl<sub>3</sub>, 500 MHz).

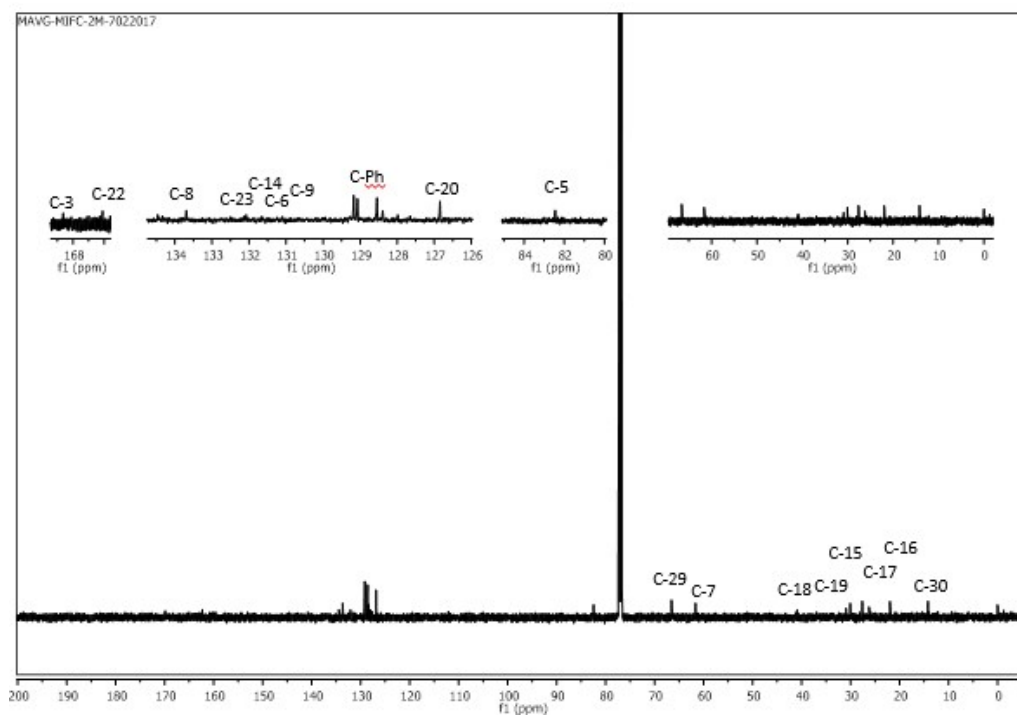

6 NMR <sup>13</sup>C (CDCl<sub>3</sub>, 125 MHz).

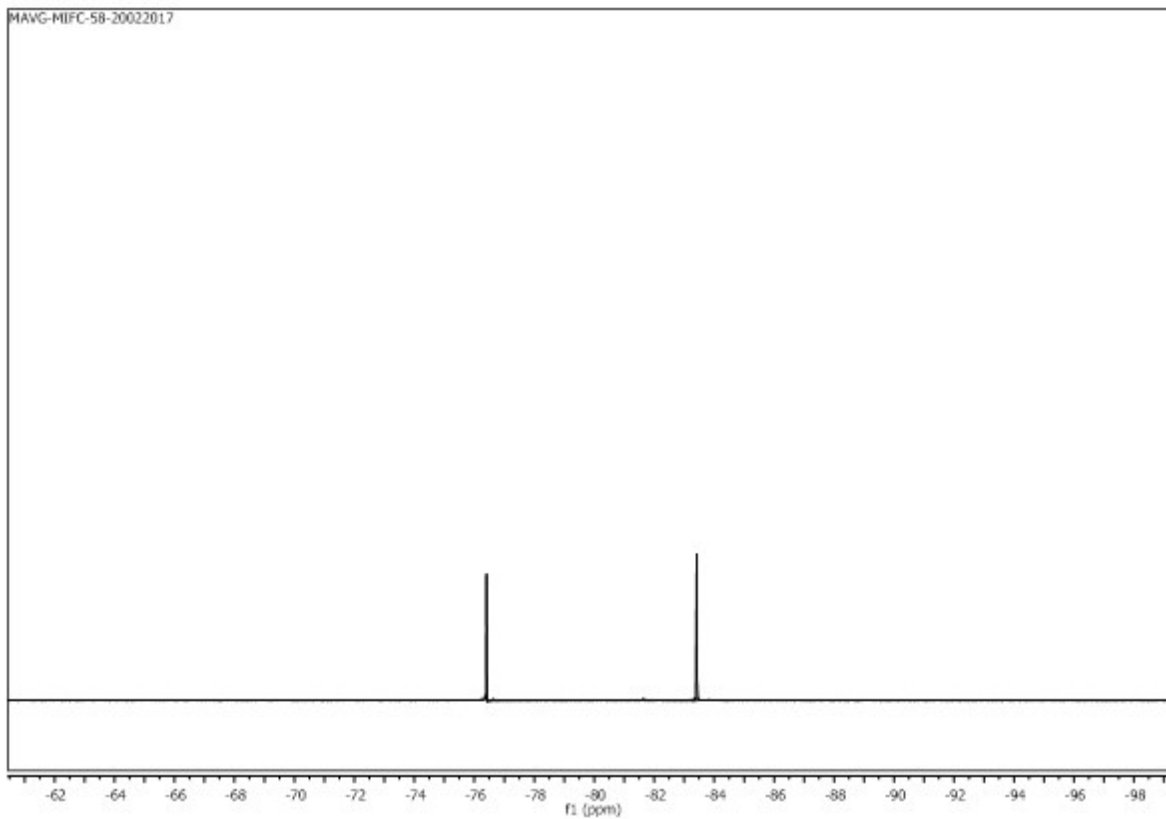

**6 NMR  $^{19}\text{F}$  ( $\text{CDCl}_3$ , 470 MHz).**

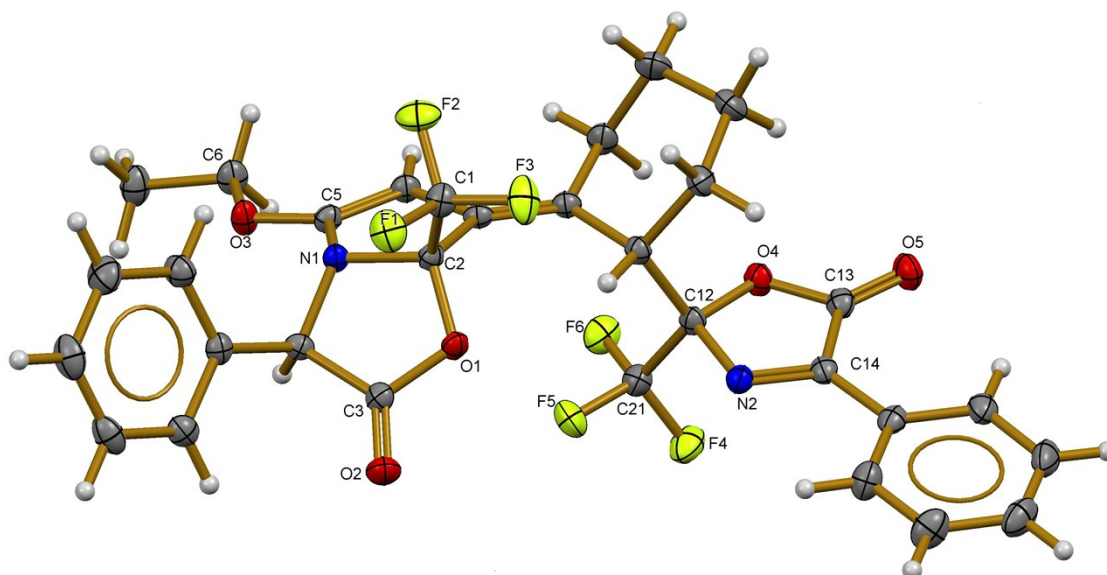

**X-Ray Data (CCDC 1911540) CCDC 1911540**



## Compound 7.

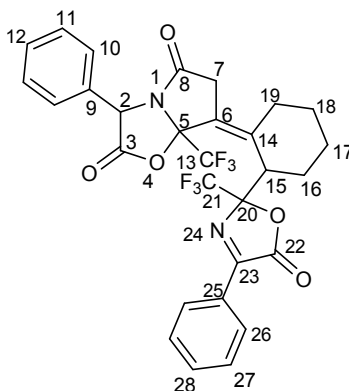

**(Z)-7-(2-(5-oxo-4-phenyl-2-(trifluoromethyl)-2,5-dihydrooxazol-2-yl)cyclohexylidene)-3-phenyl-7a-(trifluoromethyl)dihydropyrrolo[2,1-b]oxazole-2,5(3H,6H)-dione (7).**

Yield: 40%; white solid; mp: 181-182 °C. IR ( $\nu$  cm<sup>-1</sup>) 3327 (N-H), 1685 (C=O). <sup>1</sup>H NMR (500 MHz, CDCl<sub>3</sub>)  $\delta$ : 8.48 (d,  $J$  = 5.0 Hz, 2H, H-26), 7.69-7.35 (m, 8H, H-27,28,10-12), 5.64 (s, 1H, H-2), 3.40 (dd,  $^2J_{H-H}$  = 20.0, 2H, H-7), 2.28-2.17 (m, 2H, H-15), 2.06-2.01 (m, 2H, H-19), 1.75-1.71 (m, 2H, H-16), 1.58-1.56 (m, 2H, H-17), 1.39-1.36 (m, 2H, H-18). <sup>13</sup>C NMR (125 MHz, CDCl<sub>3</sub>)  $\delta$ : 174.3 (C-3), 167.9 (C-8), 162.5 (C-22), 160.1 (C-23), 143.2 (C-9), 134.1 (C-14), 131.7 (C-6, [129.2, 129.1, 128.7, 128.6, 125.8 (C-Ph)]), 127.2 (CF<sub>3</sub>-21), 121.8 (CF<sub>3</sub>-13), 57.1 (C-2), 40.5 (C-9), 37.1 (C-7), 30.3 (C-18), 28.1 (C-15), 26.7 (C-17), 21.7 (C-16). HRMS (ESI<sup>+</sup>):  $m/z$  calcd for C<sub>29</sub>H<sub>22</sub>F<sub>6</sub>N<sub>2</sub>O<sub>5</sub> [M+Na]<sup>+</sup> 615.1331, found 615.1432.

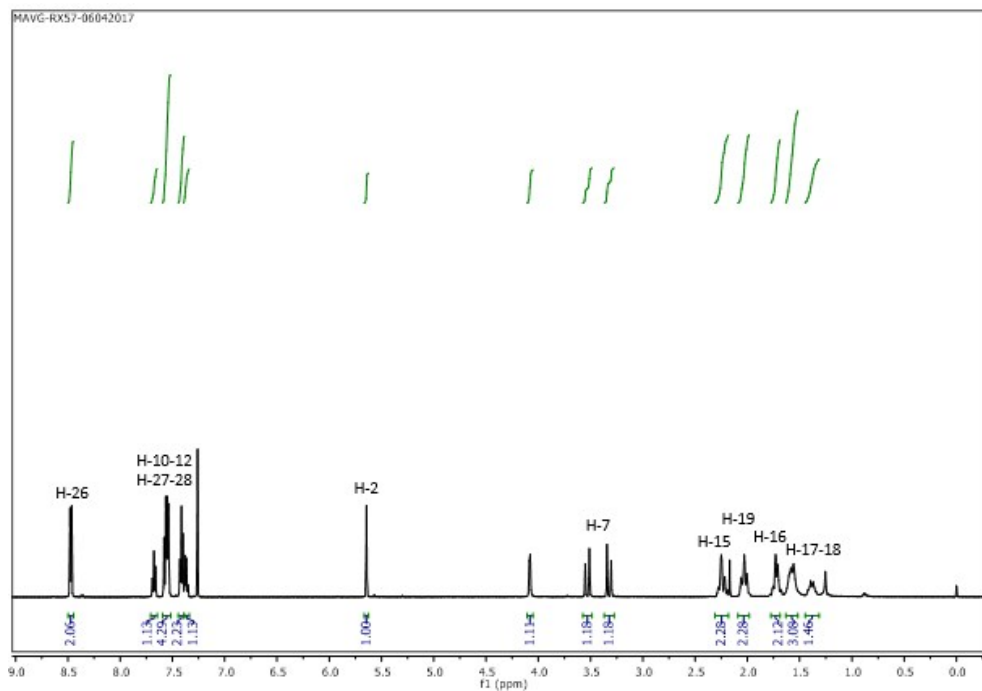

**7 NMR  $^1\text{H}$  ( $\text{CDCl}_3$ , 500 MHz).**

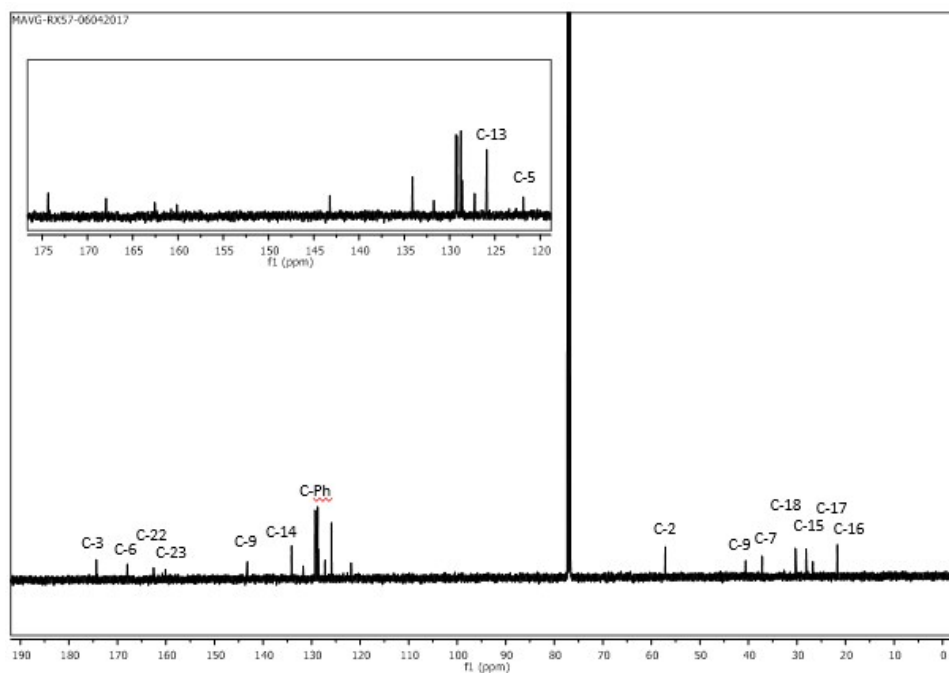

**7 NMR  $^{13}\text{C}$  ( $\text{CDCl}_3$ , 125 MHz).**

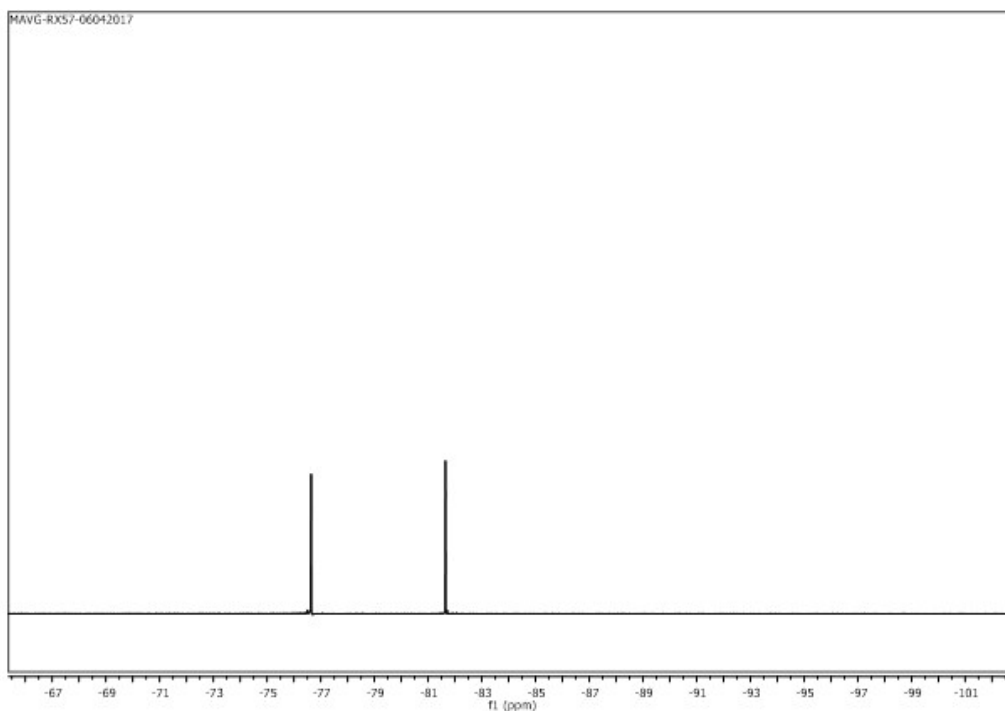

7 NMR  $^{19}\text{F}$  ( $\text{CDCl}_3$ , 470 MHz).

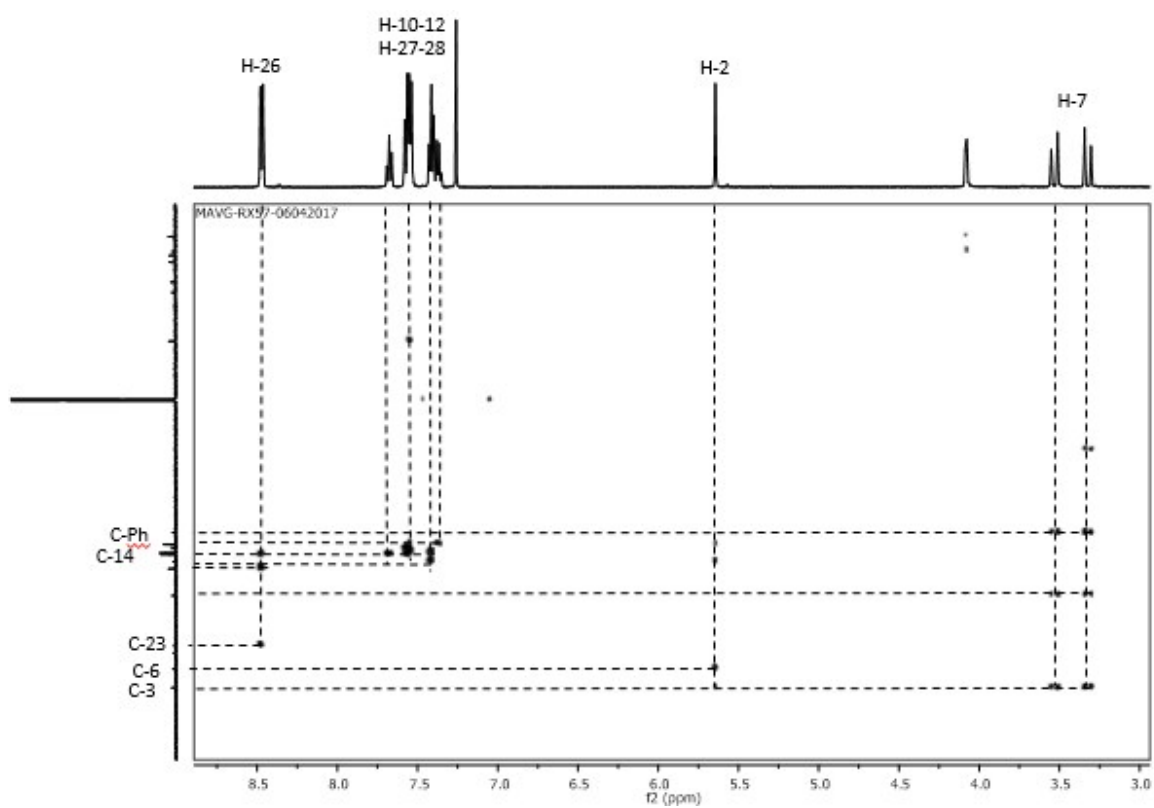

7 NMR-HSQC ( $\text{CDCl}_3$ , 500 MHz).

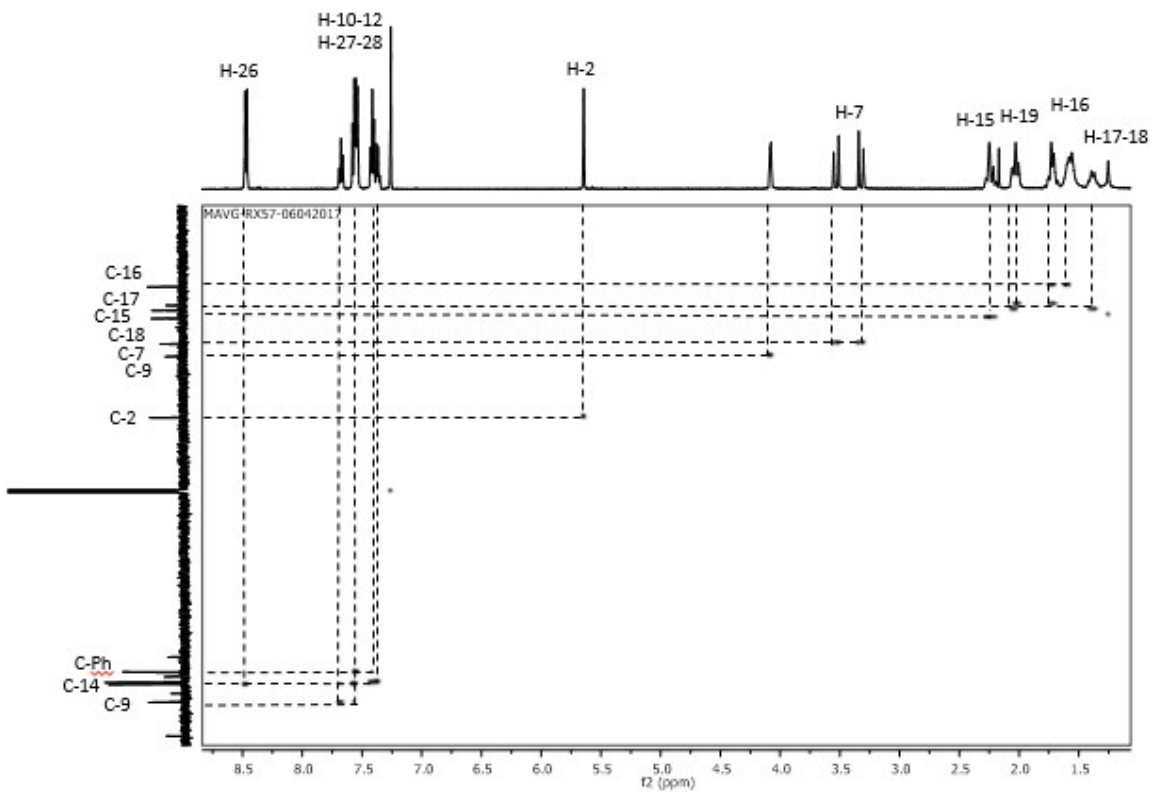

7 NMR-HMBC (CDCl<sub>3</sub>, 500 MHz).

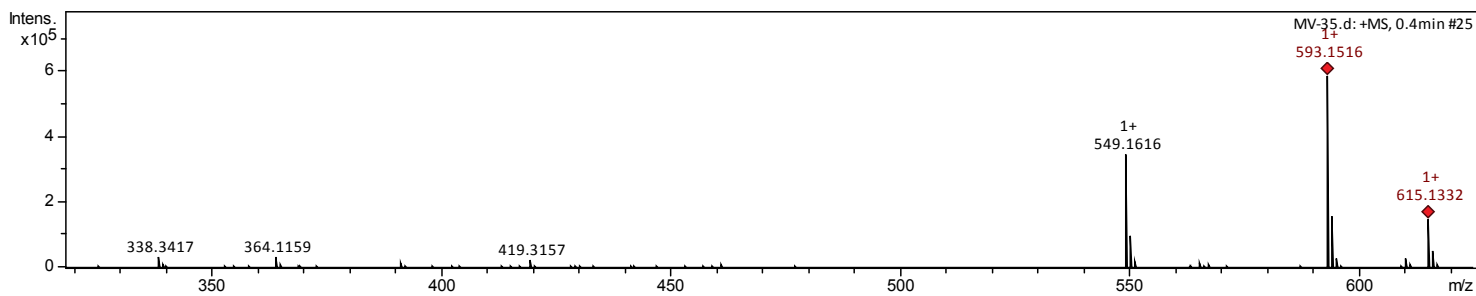

7 HRMS.

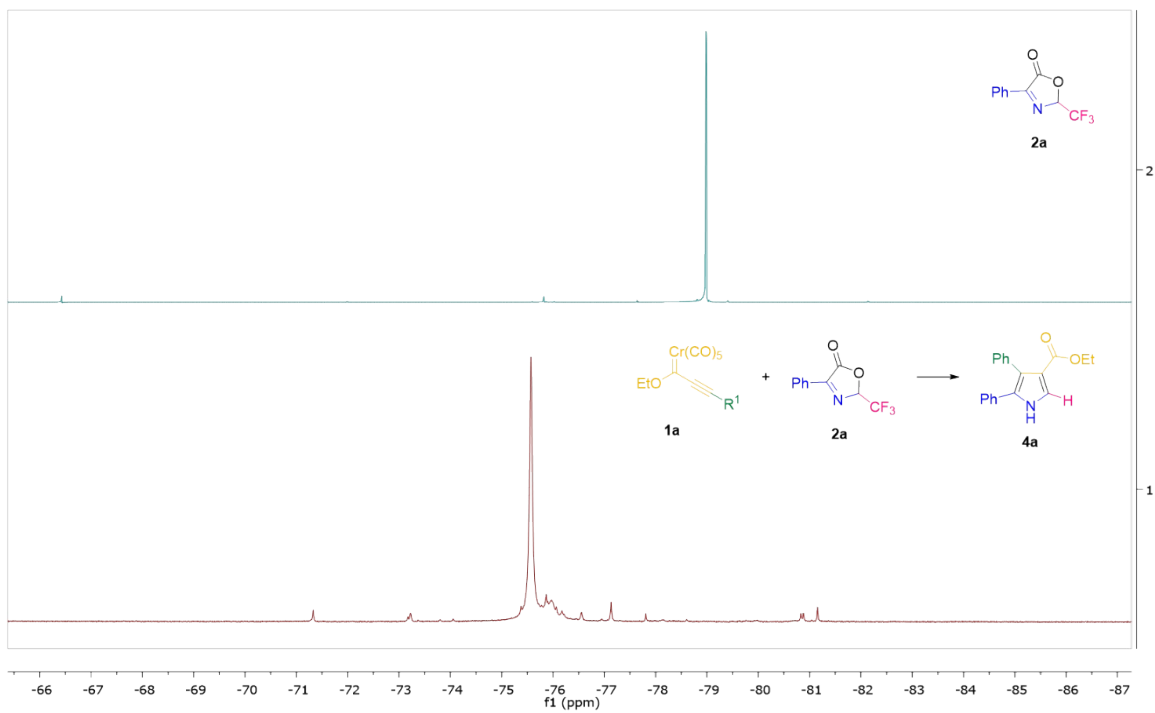

**$^{19}\text{F}$  NMR ( $\text{CDCl}_3$ , 470 MHz) of crude reaction of **2a** and **1a** compared with purified **2a**.**

## SECTION 5

All the stationary points discussed in this work were fully optimized and characterized by means of the Gaussian 09 suite of programs and using the hybrid DFT functional usually referred to as B3LYP with the D3 dispersion empirical correction. In the case of H, C, N, O and F atoms, the 6-31G(d) basis set was used. Metallic centres Ag and Cr were described by the Hay-Wadt (LANL2DZ) effective core potentials and basis sets. All of the stationary points were characterized by harmonic analysis. Reactants and products showed positive definite Hessians (NIMAG=0). Transition structures showed one, and only one, imaginary frequency (NIMAG=1) associated with the reaction coordinate under study. Free energies at 363.15 K were calculated by including the corresponding thermal corrections to Gibbs free energies (TCGE). Non-specific solvent effects were considered by means of the PCM method. The solvent used in the calculations was THF. Natural bonding analysis calculations were performed using the NBO program as implemented in Gaussian 09.

## SECTION 6

2a

HF=-889.4297044 hartree

|                                              |             |
|----------------------------------------------|-------------|
| Zero-point correction=                       | 0.149484    |
| (Hartree/Particle)                           |             |
| Thermal correction to Energy=                | 0.161988    |
| Thermal correction to Enthalpy=              | 0.162932    |
| Thermal correction to Gibbs Free Energy=     | 0.108482    |
| Sum of electronic and zero-point Energies=   | -889.280221 |
| Sum of electronic and thermal Energies=      | -889.267716 |
| Sum of electronic and thermal Enthalpies=    | -889.266772 |
| Sum of electronic and thermal Free Energies= | -889.321222 |

Standard orientation:

---

| Center | Atomic | Atomic | Coordinates (Angstroms) |           |           |
|--------|--------|--------|-------------------------|-----------|-----------|
| Number | Number | Type   | X                       | Y         | Z         |
| 1      | 6      | 0      | -2.804002               | -0.559129 | 0.215064  |
| 2      | 9      | 0      | -3.979081               | 0.090397  | 0.155898  |
| 3      | 9      | 0      | -2.320079               | -0.445752 | 1.464014  |
| 4      | 9      | 0      | -3.022121               | -1.857972 | -0.046595 |
| 5      | 6      | 0      | -1.817262               | 0.025071  | -0.806271 |
| 6      | 1      | 0      | -2.253623               | -0.067682 | -1.805091 |
| 7      | 8      | 0      | -1.634525               | 1.411166  | -0.499980 |
| 8      | 6      | 0      | -0.317692               | 1.594380  | -0.193919 |
| 9      | 8      | 0      | 0.137941                | 2.660741  | 0.129436  |
| 10     | 6      | 0      | 0.329905                | 0.230248  | -0.363111 |
| 11     | 7      | 0      | -0.546724               | -0.642785 | -0.721191 |
| 12     | 6      | 0      | 1.748324                | -0.061046 | -0.146057 |
| 13     | 6      | 0      | 4.450183                | -0.681321 | 0.251848  |
| 14     | 6      | 0      | 2.201786                | -1.387785 | -0.283395 |

|    |   |   |          |           |           |
|----|---|---|----------|-----------|-----------|
| 15 | 6 | 0 | 2.663902 | 0.950981  | 0.193475  |
| 16 | 6 | 0 | 4.008109 | 0.635619  | 0.389892  |
| 17 | 6 | 0 | 3.542895 | -1.693149 | -0.085340 |
| 18 | 1 | 0 | 1.491683 | -2.165599 | -0.543628 |
| 19 | 1 | 0 | 2.323401 | 1.972948  | 0.302508  |
| 20 | 1 | 0 | 4.710108 | 1.421788  | 0.651422  |
| 21 | 1 | 0 | 3.884627 | -2.718448 | -0.191959 |
| 22 | 1 | 0 | 5.498181 | -0.922043 | 0.406476  |

---

**DEF-N**

HF=-1732.0481596 hartree

|                                              |              |
|----------------------------------------------|--------------|
| Zero-point correction=<br>(Hartree/Particle) | 0.493875     |
| Thermal correction to Energy=                | 0.528382     |
| Thermal correction to Enthalpy=              | 0.529326     |
| Thermal correction to Gibbs Free Energy=     | 0.420325     |
| Sum of electronic and zero-point Energies=   | -1731.554285 |
| Sum of electronic and thermal Energies=      | -1731.519778 |
| Sum of electronic and thermal Enthalpies=    | -1731.518834 |
| Sum of electronic and thermal Free Energies= | -1731.627835 |

Standard orientation:

---

| Center<br>Number | Atomic<br>Number | Atomic<br>Type | Coordinates (Angstroms) |          |           |
|------------------|------------------|----------------|-------------------------|----------|-----------|
|                  |                  |                | X                       | Y        | Z         |
| 1                | 6                | 0              | -1.625612               | 2.965558 | 0.796970  |
| 2                | 9                | 0              | -2.109663               | 2.120653 | 1.736271  |
| 3                | 9                | 0              | -1.941836               | 4.226000 | 1.158233  |
| 4                | 9                | 0              | -2.320697               | 2.710745 | -0.349503 |



|    |    |   |           |           |           |
|----|----|---|-----------|-----------|-----------|
| 5  | 6  | 0 | -0.160821 | 2.787873  | 0.624839  |
| 6  | 8  | 0 | 0.517771  | 3.692820  | -0.109264 |
| 7  | 7  | 0 | 0.529749  | 1.724419  | 0.936417  |
| 8  | 6  | 0 | 1.794923  | 1.899178  | 0.402670  |
| 9  | 6  | 0 | 1.844330  | 3.128860  | -0.303917 |
| 10 | 8  | 0 | 2.675297  | 3.747976  | -0.959294 |
| 11 | 6  | 0 | 2.853460  | 0.912505  | 0.541926  |
| 12 | 6  | 0 | 4.855255  | -1.083370 | 0.736516  |
| 13 | 6  | 0 | 2.818243  | -0.060971 | 1.564894  |
| 14 | 6  | 0 | 3.939097  | 0.880562  | -0.360906 |
| 15 | 6  | 0 | 4.919556  | -0.105572 | -0.262780 |
| 16 | 6  | 0 | 3.800315  | -1.046408 | 1.653870  |
| 17 | 1  | 0 | 2.020381  | -0.031749 | 2.301666  |
| 18 | 1  | 0 | 3.994560  | 1.635543  | -1.138125 |
| 19 | 1  | 0 | 5.739213  | -0.114176 | -0.977246 |
| 20 | 1  | 0 | 3.744899  | -1.784411 | 2.450518  |
| 21 | 1  | 0 | 5.619705  | -1.852165 | 0.806390  |
| 22 | 47 | 0 | -0.450463 | -0.336420 | 0.861793  |
| 23 | 8  | 0 | 0.574732  | -2.373011 | 0.010567  |
| 24 | 8  | 0 | -1.111991 | 0.101536  | -1.602916 |
| 25 | 8  | 0 | -2.600989 | -1.308310 | 1.160926  |
| 26 | 6  | 0 | 1.030253  | -3.426422 | 0.896898  |
| 27 | 1  | 0 | 0.200575  | -4.132093 | 1.012816  |
| 28 | 1  | 0 | 1.265378  | -2.992259 | 1.874612  |
| 29 | 6  | 0 | 1.526196  | -2.211726 | -1.067698 |
| 30 | 1  | 0 | 2.280577  | -1.468979 | -0.786183 |
| 31 | 1  | 0 | 0.970927  | -1.848474 | -1.933585 |
| 32 | 6  | 0 | 2.136979  | -3.597568 | -1.237952 |
| 33 | 1  | 0 | 1.453279  | -4.247342 | -1.796330 |
| 34 | 1  | 0 | 3.097800  | -3.570531 | -1.759749 |
| 35 | 6  | 0 | 2.261623  | -4.059253 | 0.224711  |
| 36 | 1  | 0 | 2.278575  | -5.147144 | 0.333604  |

|    |   |   |           |           |           |
|----|---|---|-----------|-----------|-----------|
| 37 | 1 | 0 | 3.178676  | -3.653171 | 0.662118  |
| 38 | 6 | 0 | -2.768807 | -2.729651 | 0.948674  |
| 39 | 1 | 0 | -2.395118 | -3.242474 | 1.839416  |
| 40 | 1 | 0 | -2.165836 | -3.038426 | 0.084725  |
| 41 | 6 | 0 | -3.722497 | -0.579555 | 0.582636  |
| 42 | 1 | 0 | -3.327814 | 0.164189  | -0.114125 |
| 43 | 1 | 0 | -4.236512 | -0.064952 | 1.401893  |
| 44 | 6 | 0 | -4.609077 | -1.637390 | -0.084266 |
| 45 | 1 | 0 | -4.336056 | -1.758005 | -1.138165 |
| 46 | 1 | 0 | -5.669616 | -1.375629 | -0.036388 |
| 47 | 6 | 0 | -4.263012 | -2.914311 | 0.699608  |
| 48 | 1 | 0 | -4.805227 | -2.941009 | 1.651586  |
| 49 | 1 | 0 | -4.485723 | -3.832109 | 0.148043  |
| 50 | 6 | 0 | -0.352706 | 1.059608  | -2.375399 |
| 51 | 1 | 0 | 0.717282  | 0.884460  | -2.204784 |
| 52 | 1 | 0 | -0.604978 | 2.058644  | -2.015685 |
| 53 | 6 | 0 | -1.647306 | -0.922269 | -2.466187 |
| 54 | 1 | 0 | -2.737083 | -0.800088 | -2.518327 |
| 55 | 1 | 0 | -1.424869 | -1.897603 | -2.021298 |
| 56 | 6 | 0 | -0.997890 | -0.704968 | -3.836759 |
| 57 | 1 | 0 | -0.047598 | -1.247382 | -3.905798 |
| 58 | 1 | 0 | -1.638381 | -1.037835 | -4.658431 |
| 59 | 6 | 0 | -0.745344 | 0.811210  | -3.831561 |
| 60 | 1 | 0 | 0.032340  | 1.124071  | -4.533904 |
| 61 | 1 | 0 | -1.667594 | 1.351723  | -4.074349 |

---

**DEF-C**

HF=-1732.0489885 hartree

Zero-point correction=  
(Hartree/Particle)

0.495224

Thermal correction to Energy= 0.529077  
 Thermal correction to Enthalpy= 0.530022  
 Thermal correction to Gibbs Free Energy= 0.424239  
 Sum of electronic and zero-point Energies= -1731.553765  
 Sum of electronic and thermal Energies= -1731.519911  
 Sum of electronic and thermal Enthalpies= -1731.518967  
 Sum of electronic and thermal Free Energies= -1731.624749

Standard orientation:

| Center<br>Number | Atomic<br>Number | Atomic<br>Type | Coordinates (Angstroms) |           |           |
|------------------|------------------|----------------|-------------------------|-----------|-----------|
|                  |                  |                | X                       | Y         | Z         |
| 1                | 6                | 0              | -0.020952               | -3.097965 | 0.945351  |
| 2                | 9                | 0              | 1.181254                | -3.489919 | 0.450955  |
| 3                | 9                | 0              | -0.909902               | -4.057890 | 0.584315  |
| 4                | 9                | 0              | 0.067000                | -3.119175 | 2.291776  |
| 5                | 6                | 0              | -0.404612               | -1.723845 | 0.461085  |
| 6                | 8                | 0              | -0.489981               | -1.707996 | -0.970608 |
| 7                | 6                | 0              | -1.630809               | -1.024415 | -1.295107 |
| 8                | 8                | 0              | -1.890202               | -0.700106 | -2.444047 |
| 9                | 6                | 0              | -2.328511               | -0.802261 | -0.012090 |
| 10               | 7                | 0              | -1.605271               | -1.264267 | 0.979012  |
| 11               | 6                | 0              | -3.627037               | -0.147087 | 0.161994  |
| 12               | 6                | 0              | -6.093461               | 1.157073  | 0.533222  |
| 13               | 6                | 0              | -4.057901               | 0.221373  | 1.451304  |
| 14               | 6                | 0              | -4.458429               | 0.136794  | -0.936882 |
| 15               | 6                | 0              | -5.679761               | 0.785102  | -0.748052 |
| 16               | 6                | 0              | -5.277324               | 0.867847  | 1.633266  |
| 17               | 1                | 0              | -3.420848               | 0.000974  | 2.301945  |
| 18               | 1                | 0              | -4.137225               | -0.145542 | -1.932545 |
| 19               | 1                | 0              | -6.309002               | 1.000746  | -1.607346 |
| 20               | 1                | 0              | -5.591842               | 1.150969  | 2.634208  |

|    |    |   |           |           |           |
|----|----|---|-----------|-----------|-----------|
| 21 | 1  | 0 | -7.042721 | 1.666025  | 0.675954  |
| 22 | 47 | 0 | 1.210611  | -0.279337 | 0.948302  |
| 23 | 8  | 0 | 2.917772  | -0.452922 | -1.188009 |
| 24 | 8  | 0 | 2.758391  | 1.303945  | 1.577287  |
| 25 | 8  | 0 | -0.329002 | 1.706212  | -0.300243 |
| 26 | 6  | 0 | -1.153312 | 2.359778  | 0.686863  |
| 27 | 1  | 0 | -0.537027 | 3.056714  | 1.271028  |
| 28 | 1  | 0 | -1.524062 | 1.578631  | 1.354367  |
| 29 | 6  | 0 | -0.540496 | 2.358785  | -1.560824 |
| 30 | 1  | 0 | -0.271195 | 1.650697  | -2.345866 |
| 31 | 1  | 0 | 0.104763  | 3.248832  | -1.636209 |
| 32 | 6  | 0 | -2.021147 | 2.728288  | -1.556459 |
| 33 | 1  | 0 | -2.604781 | 1.850390  | -1.841826 |
| 34 | 1  | 0 | -2.254536 | 3.544075  | -2.247242 |
| 35 | 6  | 0 | -2.277534 | 3.096839  | -0.079432 |
| 36 | 1  | 0 | -2.199347 | 4.177995  | 0.073949  |
| 37 | 1  | 0 | -3.268745 | 2.777386  | 0.252222  |
| 38 | 6  | 0 | 4.170334  | 0.941795  | 1.509862  |
| 39 | 1  | 0 | 4.301602  | 0.266034  | 0.659954  |
| 40 | 1  | 0 | 4.424844  | 0.424251  | 2.439084  |
| 41 | 6  | 0 | 2.578881  | 2.687066  | 1.158910  |
| 42 | 1  | 0 | 2.374835  | 3.288943  | 2.053349  |
| 43 | 1  | 0 | 1.715328  | 2.724361  | 0.492602  |
| 44 | 6  | 0 | 3.898425  | 3.082223  | 0.500594  |
| 45 | 1  | 0 | 3.906486  | 2.772284  | -0.550531 |
| 46 | 1  | 0 | 4.077622  | 4.160065  | 0.545234  |
| 47 | 6  | 0 | 4.915952  | 2.260498  | 1.307732  |
| 48 | 1  | 0 | 5.866753  | 2.118613  | 0.786357  |
| 49 | 1  | 0 | 5.118335  | 2.743463  | 2.270470  |
| 50 | 6  | 0 | 2.927783  | -1.743096 | -1.851530 |
| 51 | 1  | 0 | 2.200017  | -2.379224 | -1.344431 |
| 52 | 1  | 0 | 3.925126  | -2.185512 | -1.744735 |

|    |   |   |          |           |           |
|----|---|---|----------|-----------|-----------|
| 53 | 6 | 0 | 2.599497 | 0.570574  | -2.148364 |
| 54 | 1 | 0 | 3.528857 | 1.002123  | -2.551844 |
| 55 | 1 | 0 | 2.046097 | 1.354186  | -1.626391 |
| 56 | 6 | 0 | 1.803144 | -0.141800 | -3.238737 |
| 57 | 1 | 0 | 0.769132 | -0.299664 | -2.915313 |
| 58 | 1 | 0 | 1.797803 | 0.406041  | -4.185934 |
| 59 | 6 | 0 | 2.543418 | -1.487062 | -3.318059 |
| 60 | 1 | 0 | 1.925451 | -2.291550 | -3.726559 |
| 61 | 1 | 0 | 3.438599 | -1.392817 | -3.943543 |

-----

**ABC**

HF=-1063.923726 hartree

|                                              |              |
|----------------------------------------------|--------------|
| Zero-point correction=                       | 0.274001     |
| (Hartree/Particle)                           |              |
| Thermal correction to Energy=                | 0.293424     |
| Thermal correction to Enthalpy=              | 0.294368     |
| Thermal correction to Gibbs Free Energy=     | 0.224506     |
| Sum of electronic and zero-point Energies=   | -1063.649725 |
| Sum of electronic and thermal Energies=      | -1063.630302 |
| Sum of electronic and thermal Enthalpies=    | -1063.629358 |
| Sum of electronic and thermal Free Energies= | -1063.699220 |

Standard orientation:

-----

| Center<br>Number | Atomic<br>Number | Atomic<br>Type | Coordinates (Angstroms) |           |           |
|------------------|------------------|----------------|-------------------------|-----------|-----------|
|                  |                  |                | X                       | Y         | Z         |
| 1                | 6                | 0              | -2.977025               | 0.451210  | -0.381855 |
| 2                | 9                | 0              | -3.500187               | 0.119248  | 0.837944  |
| 3                | 9                | 0              | -3.015661               | -0.671554 | -1.134660 |
| 4                | 9                | 0              | -3.822075               | 1.354203  | -0.918141 |

-----

|    |   |   |           |           |           |
|----|---|---|-----------|-----------|-----------|
| 5  | 6 | 0 | -1.589493 | 0.963319  | -0.281587 |
| 6  | 8 | 0 | -1.384687 | 2.194960  | 0.230286  |
| 7  | 6 | 0 | 0.054832  | 2.321453  | 0.375536  |
| 8  | 8 | 0 | 0.528878  | 3.354991  | 0.834700  |
| 9  | 6 | 0 | 0.552024  | 1.084316  | -0.114196 |
| 10 | 6 | 0 | 1.938957  | 0.673893  | -0.236097 |
| 11 | 6 | 0 | 4.631500  | -0.190172 | -0.421386 |
| 12 | 6 | 0 | 2.302458  | -0.420998 | -1.051544 |
| 13 | 6 | 0 | 2.967684  | 1.344274  | 0.461558  |
| 14 | 6 | 0 | 4.289789  | 0.915222  | 0.365477  |
| 15 | 6 | 0 | 3.626220  | -0.851030 | -1.133650 |
| 16 | 1 | 0 | 1.538297  | -0.909280 | -1.649577 |
| 17 | 1 | 0 | 2.710711  | 2.201297  | 1.074899  |
| 18 | 1 | 0 | 5.062188  | 1.446799  | 0.916344  |
| 19 | 1 | 0 | 3.875222  | -1.695756 | -1.771937 |
| 20 | 1 | 0 | 5.663833  | -0.522017 | -0.488198 |
| 21 | 7 | 0 | -0.504101 | 0.273126  | -0.493113 |
| 22 | 1 | 0 | -0.374073 | -1.434716 | -0.094015 |
| 23 | 7 | 0 | -0.309021 | -2.342630 | 0.453287  |
| 24 | 6 | 0 | -1.709578 | -2.726045 | 0.813527  |
| 25 | 1 | 0 | -2.267764 | -2.914024 | -0.103078 |
| 26 | 1 | 0 | -2.169894 | -1.899462 | 1.354536  |
| 27 | 1 | 0 | -1.682561 | -3.621959 | 1.435689  |
| 28 | 6 | 0 | 0.346157  | -3.377915 | -0.403033 |
| 29 | 1 | 0 | 1.359708  | -3.049243 | -0.632219 |
| 30 | 1 | 0 | -0.229482 | -3.486487 | -1.323300 |
| 31 | 1 | 0 | 0.370449  | -4.324486 | 0.140464  |
| 32 | 6 | 0 | 0.506094  | -2.031217 | 1.669987  |
| 33 | 1 | 0 | 1.493469  | -1.699205 | 1.348735  |
| 34 | 1 | 0 | 0.580450  | -2.928521 | 2.286810  |
| 35 | 1 | 0 | 0.011364  | -1.230944 | 2.221036  |

---

**TS1-H**

HF=-2177.9653541 hartree

NIMAG=1 (-301.0111 cm<sup>-1</sup>)

|                                              |              |
|----------------------------------------------|--------------|
| Zero-point correction=<br>(Hartree/Particle) | 0.465538     |
| Thermal correction to Energy=                | 0.508175     |
| Thermal correction to Enthalpy=              | 0.509119     |
| Thermal correction to Gibbs Free Energy=     | 0.386629     |
| Sum of electronic and zero-point Energies=   | -2177.499816 |
| Sum of electronic and thermal Energies=      | -2177.457179 |
| Sum of electronic and thermal Enthalpies=    | -2177.456235 |
| Sum of electronic and thermal Free Energies= | -2177.578725 |

Standard orientation:

---

| Center<br>Number | Atomic<br>Number | Atomic<br>Type | Coordinates (Angstroms) |           |           |
|------------------|------------------|----------------|-------------------------|-----------|-----------|
|                  |                  |                | X                       | Y         | Z         |
| 1                | 6                | 0              | -2.621821               | -3.579786 | -1.345059 |
| 2                | 6                | 0              | -3.326901               | -4.281342 | -0.362091 |
| 3                | 6                | 0              | -3.124439               | -3.982385 | 0.989657  |
| 4                | 6                | 0              | -2.223798               | -2.988589 | 1.363182  |
| 5                | 6                | 0              | -1.500199               | -2.283587 | 0.376755  |
| 6                | 6                | 0              | -1.718120               | -2.584107 | -0.984981 |
| 7                | 6                | 0              | -0.629762               | -1.218423 | 0.744211  |
| 8                | 6                | 0              | -2.077336               | 0.655473  | 0.864871  |
| 9                | 7                | 0              | -1.038983               | 1.498197  | 0.576011  |
| 10               | 6                | 0              | -0.095334               | 1.269633  | 1.527069  |
| 11               | 6                | 0              | 0.459448                | -0.606919 | 0.973030  |
| 12               | 8                | 0              | -0.738666               | 0.906186  | 2.691156  |
| 13               | 6                | 0              | -1.982910               | 0.364721  | 2.292946  |

---

|    |    |   |           |           |           |
|----|----|---|-----------|-----------|-----------|
| 14 | 6  | 0 | -3.187242 | 0.374872  | -0.031697 |
| 15 | 6  | 0 | -4.429641 | -0.053803 | 0.466879  |
| 16 | 6  | 0 | -5.461630 | -0.369838 | -0.415869 |
| 17 | 6  | 0 | -5.271809 | -0.263273 | -1.796286 |
| 18 | 6  | 0 | -4.031621 | 0.144711  | -2.298022 |
| 19 | 6  | 0 | -2.991108 | 0.447240  | -1.424414 |
| 20 | 6  | 0 | 1.036966  | 2.245117  | 1.701832  |
| 21 | 9  | 0 | 1.999352  | 1.728701  | 2.485128  |
| 22 | 8  | 0 | -2.711934 | -0.198994 | 3.080413  |
| 23 | 6  | 0 | 1.871833  | -0.851801 | 0.919687  |
| 24 | 24 | 0 | 2.922130  | -0.773075 | -0.840076 |
| 25 | 6  | 0 | 4.280239  | -1.840360 | -0.036911 |
| 26 | 8  | 0 | 5.107801  | -2.487567 | 0.439381  |
| 27 | 9  | 0 | 1.568855  | 2.525104  | 0.494738  |
| 28 | 9  | 0 | 0.631446  | 3.406184  | 2.252881  |
| 29 | 8  | 0 | 2.472665  | -1.156017 | 2.052283  |
| 30 | 6  | 0 | 1.726284  | -1.311780 | 3.294339  |
| 31 | 6  | 0 | 2.003986  | -2.356638 | -1.345248 |
| 32 | 8  | 0 | 1.436528  | -3.320629 | -1.632925 |
| 33 | 6  | 0 | 1.537843  | 0.261248  | -1.603246 |
| 34 | 8  | 0 | 0.673611  | 0.866765  | -2.080312 |
| 35 | 6  | 0 | 3.820288  | 0.772320  | -0.191580 |
| 36 | 8  | 0 | 4.380493  | 1.691006  | 0.225672  |
| 37 | 6  | 0 | 3.873288  | -0.723524 | -2.463727 |
| 38 | 8  | 0 | 4.456476  | -0.691688 | -3.464299 |
| 39 | 7  | 0 | -1.210943 | 3.512211  | -1.371029 |
| 40 | 6  | 0 | -1.317966 | 3.309157  | -2.822125 |
| 41 | 6  | 0 | -2.481099 | 4.009374  | -0.821023 |
| 42 | 6  | 0 | -0.119232 | 4.449523  | -1.069978 |
| 43 | 1  | 0 | -4.573474 | -0.141066 | 1.537223  |
| 44 | 1  | 0 | -2.012124 | 0.702899  | -1.816027 |
| 45 | 1  | 0 | -3.867749 | 0.204381  | -3.370201 |



|    |   |   |           |           |           |
|----|---|---|-----------|-----------|-----------|
| 46 | 1 | 0 | -6.418908 | -0.699536 | -0.022530 |
| 47 | 1 | 0 | -6.080353 | -0.510034 | -2.478308 |
| 48 | 1 | 0 | -1.174699 | -2.031661 | -1.743446 |
| 49 | 1 | 0 | -2.080313 | -2.734988 | 2.407883  |
| 50 | 1 | 0 | -3.675106 | -4.522302 | 1.754771  |
| 51 | 1 | 0 | -2.781111 | -3.804776 | -2.395768 |
| 52 | 1 | 0 | -4.032676 | -5.056093 | -0.647806 |
| 53 | 1 | 0 | -0.933464 | 2.077341  | -0.304727 |
| 54 | 1 | 0 | -2.389109 | 4.119604  | 0.264192  |
| 55 | 1 | 0 | -3.275697 | 3.287249  | -1.029774 |
| 56 | 1 | 0 | -2.764194 | 4.984193  | -1.250956 |
| 57 | 1 | 0 | 0.821285  | 4.049174  | -1.456809 |
| 58 | 1 | 0 | -0.024747 | 4.570142  | 0.012381  |
| 59 | 1 | 0 | -0.296559 | 5.440338  | -1.520299 |
| 60 | 1 | 0 | -0.393772 | 2.863923  | -3.196795 |
| 61 | 1 | 0 | -1.500201 | 4.258601  | -3.352998 |
| 62 | 1 | 0 | -2.146769 | 2.630428  | -3.039127 |
| 63 | 1 | 0 | 2.469675  | -1.602478 | 4.035221  |
| 64 | 1 | 0 | 0.971857  | -2.091975 | 3.174704  |
| 65 | 1 | 0 | 1.254629  | -0.368240 | 3.567260  |

-----

**INT1-H**

HF=-2178.0181078 hartree

|                                            |              |
|--------------------------------------------|--------------|
| Zero-point correction=                     | 0.469699     |
| (Hartree/Particle)                         |              |
| Thermal correction to Energy=              | 0.511728     |
| Thermal correction to Enthalpy=            | 0.512673     |
| Thermal correction to Gibbs Free Energy=   | 0.392483     |
| Sum of electronic and zero-point Energies= | -2177.548409 |
| Sum of electronic and thermal Energies=    | -2177.506379 |

Sum of electronic and thermal Enthalpies= -2177.505435

Sum of electronic and thermal Free Energies= -2177.625624

Standard orientation:

---

| Center<br>Number | Atomic<br>Number | Atomic<br>Type | Coordinates (Angstroms) |           |           |
|------------------|------------------|----------------|-------------------------|-----------|-----------|
|                  |                  |                | X                       | Y         | Z         |
| 1                | 6                | 0              | 1.811293                | 0.420727  | 0.236263  |
| 2                | 7                | 0              | 1.554643                | -0.834877 | -0.514047 |
| 3                | 6                | 0              | 0.671564                | -1.368726 | 0.476243  |
| 4                | 6                | 0              | 0.213697                | -2.794276 | 0.209313  |
| 5                | 9                | 0              | -0.389899               | -2.861121 | -0.988508 |
| 6                | 9                | 0              | 1.255198                | -3.645112 | 0.201989  |
| 7                | 9                | 0              | -0.663304               | -3.212868 | 1.144336  |
| 8                | 6                | 0              | 2.212116                | -0.206774 | 1.621735  |
| 9                | 8                | 0              | 2.993649                | 0.160678  | 2.460727  |
| 10               | 8                | 0              | 1.476483                | -1.357424 | 1.739941  |
| 11               | 6                | 0              | 0.348850                | 0.892244  | 0.495665  |
| 12               | 6                | 0              | -0.369696               | -0.244725 | 0.630464  |
| 13               | 6                | 0              | 2.788592                | 1.361813  | -0.403072 |
| 14               | 6                | 0              | 4.539515                | 3.150340  | -1.660988 |
| 15               | 6                | 0              | 3.493780                | 2.305220  | 0.354693  |
| 16               | 6                | 0              | 2.955781                | 1.325059  | -1.794303 |
| 17               | 6                | 0              | 3.829428                | 2.215470  | -2.419689 |
| 18               | 6                | 0              | 4.368060                | 3.192893  | -0.275340 |
| 19               | 1                | 0              | 3.364727                | 2.339294  | 1.429709  |
| 20               | 1                | 0              | 2.393724                | 0.602944  | -2.377471 |
| 21               | 1                | 0              | 3.953645                | 2.179374  | -3.498290 |
| 22               | 1                | 0              | 4.914113                | 3.919687  | 0.319329  |
| 23               | 1                | 0              | 5.220092                | 3.843324  | -2.147631 |
| 24               | 6                | 0              | -0.093727               | 2.276617  | 0.694228  |
| 25               | 6                | 0              | -1.025732               | 4.905400  | 1.052508  |

|    |    |   |           |           |           |
|----|----|---|-----------|-----------|-----------|
| 26 | 6  | 0 | 0.291054  | 3.299286  | -0.193568 |
| 27 | 6  | 0 | -0.950300 | 2.597560  | 1.764208  |
| 28 | 6  | 0 | -1.411298 | 3.900235  | 1.941975  |
| 29 | 6  | 0 | -0.177323 | 4.599350  | -0.015266 |
| 30 | 1  | 0 | 0.933391  | 3.069780  | -1.035020 |
| 31 | 1  | 0 | -1.246462 | 1.826283  | 2.466619  |
| 32 | 1  | 0 | -2.069169 | 4.128754  | 2.775425  |
| 33 | 1  | 0 | 0.118606  | 5.374950  | -0.715738 |
| 34 | 1  | 0 | -1.384882 | 5.921399  | 1.189269  |
| 35 | 1  | 0 | 2.441394  | -1.386614 | -0.534005 |
| 36 | 7  | 0 | 4.195324  | -2.155159 | -0.328635 |
| 37 | 6  | 0 | 4.356250  | -2.836936 | 0.959199  |
| 38 | 1  | 0 | 3.531736  | -3.538262 | 1.107669  |
| 39 | 1  | 0 | 4.330641  | -2.101245 | 1.768223  |
| 40 | 1  | 0 | 5.309742  | -3.391221 | 1.018719  |
| 41 | 6  | 0 | 4.183455  | -3.114668 | -1.435720 |
| 42 | 1  | 0 | 4.025334  | -2.582165 | -2.379329 |
| 43 | 1  | 0 | 3.359351  | -3.820599 | -1.295087 |
| 44 | 1  | 0 | 5.127012  | -3.684180 | -1.509708 |
| 45 | 6  | 0 | 5.234644  | -1.139082 | -0.515803 |
| 46 | 1  | 0 | 5.068607  | -0.610424 | -1.458783 |
| 47 | 1  | 0 | 6.248415  | -1.577662 | -0.528530 |
| 48 | 1  | 0 | 5.179629  | -0.406645 | 0.295224  |
| 49 | 6  | 0 | -1.819096 | -0.417885 | 0.850808  |
| 50 | 8  | 0 | -2.194302 | -0.773755 | 2.061392  |
| 51 | 6  | 0 | -1.271742 | -0.960342 | 3.175261  |
| 52 | 1  | 0 | -1.892417 | -0.906496 | 4.068223  |
| 53 | 1  | 0 | -0.511044 | -0.178637 | 3.182173  |
| 54 | 1  | 0 | -0.802438 | -1.938899 | 3.088217  |
| 55 | 24 | 0 | -3.161872 | -0.269501 | -0.646998 |
| 56 | 6  | 0 | -3.104167 | 1.639340  | -0.667684 |
| 57 | 8  | 0 | -3.123042 | 2.790422  | -0.720550 |

|    |   |   |           |           |           |
|----|---|---|-----------|-----------|-----------|
| 58 | 6 | 0 | -1.770454 | -0.293447 | -1.950950 |
| 59 | 8 | 0 | -0.963504 | -0.273581 | -2.774524 |
| 60 | 6 | 0 | -3.267607 | -2.168805 | -0.604217 |
| 61 | 8 | 0 | -3.346413 | -3.318460 | -0.554353 |
| 62 | 6 | 0 | -4.439842 | -0.235953 | -2.044865 |
| 63 | 8 | 0 | -5.226885 | -0.227211 | -2.892048 |
| 64 | 6 | 0 | -4.540587 | -0.181226 | 0.660303  |
| 65 | 8 | 0 | -5.382931 | -0.116268 | 1.445513  |

---

### INT2-H

HF=-2003.5103522 hartree

|                                              |              |
|----------------------------------------------|--------------|
| Zero-point correction=<br>(Hartree/Particle) | 0.346798     |
| Thermal correction to Energy=                | 0.381714     |
| Thermal correction to Enthalpy=              | 0.382658     |
| Thermal correction to Gibbs Free Energy=     | 0.278753     |
| Sum of electronic and zero-point Energies=   | -2003.163554 |
| Sum of electronic and thermal Energies=      | -2003.128638 |
| Sum of electronic and thermal Enthalpies=    | -2003.127694 |
| Sum of electronic and thermal Free Energies= | -2003.231599 |

Standard orientation:

---

| Center<br>Number | Atomic<br>Number | Atomic<br>Type | Coordinates (Angstroms) |           |           |
|------------------|------------------|----------------|-------------------------|-----------|-----------|
|                  |                  |                | X                       | Y         | Z         |
| 1                | 6                | 0              | -1.110316               | 0.217534  | -0.404785 |
| 2                | 6                | 0              | -0.021315               | -0.544236 | -0.673027 |
| 3                | 6                | 0              | -0.402982               | -1.951052 | -0.133031 |

---

|    |   |   |           |           |           |
|----|---|---|-----------|-----------|-----------|
| 4  | 6 | 0 | -2.156287 | -0.759830 | 0.243809  |
| 5  | 6 | 0 | -1.489754 | -1.067030 | 1.612081  |
| 6  | 8 | 0 | -1.768745 | -0.717339 | 2.725261  |
| 7  | 8 | 0 | -0.385674 | -1.839466 | 1.318561  |
| 8  | 7 | 0 | -1.822468 | -2.067561 | -0.388914 |
| 9  | 1 | 0 | -2.020367 | -2.034353 | -1.389611 |
| 10 | 6 | 0 | 0.387815  | -3.179948 | -0.576698 |
| 11 | 9 | 0 | 0.005721  | -3.500576 | -1.836122 |
| 12 | 9 | 0 | 1.712975  | -2.945393 | -0.606743 |
| 13 | 9 | 0 | 0.155811  | -4.226950 | 0.214576  |
| 14 | 6 | 0 | -3.617237 | -0.412896 | 0.184170  |
| 15 | 6 | 0 | -6.351933 | 0.148947  | -0.066607 |
| 16 | 6 | 0 | -4.487886 | -0.664334 | 1.251230  |
| 17 | 6 | 0 | -4.127265 | 0.115477  | -1.010761 |
| 18 | 6 | 0 | -5.487270 | 0.393554  | -1.137203 |
| 19 | 6 | 0 | -5.849356 | -0.379346 | 1.124130  |
| 20 | 1 | 0 | -4.106324 | -1.068892 | 2.180920  |
| 21 | 1 | 0 | -3.455772 | 0.319130  | -1.840489 |
| 22 | 1 | 0 | -5.869444 | 0.804804  | -2.066998 |
| 23 | 1 | 0 | -6.516406 | -0.572586 | 1.959290  |
| 24 | 1 | 0 | -7.411267 | 0.370396  | -0.160686 |
| 25 | 6 | 0 | -1.246540 | 1.672781  | -0.459924 |
| 26 | 6 | 0 | -1.419787 | 4.480810  | -0.484678 |
| 27 | 6 | 0 | -2.055676 | 2.350242  | 0.473134  |
| 28 | 6 | 0 | -0.533031 | 2.429402  | -1.407497 |
| 29 | 6 | 0 | -0.617826 | 3.820295  | -1.418216 |
| 30 | 6 | 0 | -2.135431 | 3.740020  | 0.461256  |
| 31 | 1 | 0 | -2.595816 | 1.788879  | 1.227182  |
| 32 | 1 | 0 | 0.089043  | 1.933014  | -2.143720 |
| 33 | 1 | 0 | -0.054525 | 4.384992  | -2.154871 |
| 34 | 1 | 0 | -2.754088 | 4.246199  | 1.196408  |
| 35 | 1 | 0 | -1.486243 | 5.564835  | -0.492766 |

|    |    |   |           |           |           |
|----|----|---|-----------|-----------|-----------|
| 36 | 6  | 0 | 1.362438  | -0.126400 | -0.977933 |
| 37 | 8  | 0 | 1.715589  | -0.182812 | -2.245419 |
| 38 | 6  | 0 | 0.810464  | -0.624135 | -3.302403 |
| 39 | 1  | 0 | 1.365527  | -0.471028 | -4.226333 |
| 40 | 1  | 0 | -0.101359 | -0.024546 | -3.297224 |
| 41 | 1  | 0 | 0.577298  | -1.679840 | -3.166672 |
| 42 | 24 | 0 | 2.681592  | 0.523776  | 0.415247  |
| 43 | 6  | 0 | 2.721620  | 2.161324  | -0.551050 |
| 44 | 8  | 0 | 2.746737  | 3.143004  | -1.156092 |
| 45 | 6  | 0 | 3.965051  | 1.208701  | 1.628567  |
| 46 | 8  | 0 | 4.756866  | 1.636602  | 2.353653  |
| 47 | 6  | 0 | 4.068137  | -0.167525 | -0.692477 |
| 48 | 8  | 0 | 4.906141  | -0.594479 | -1.359026 |
| 49 | 6  | 0 | 1.294574  | 1.152526  | 1.549861  |
| 50 | 8  | 0 | 0.475781  | 1.514917  | 2.277147  |
| 51 | 6  | 0 | 2.651736  | -1.115974 | 1.392257  |
| 52 | 8  | 0 | 2.672879  | -2.084910 | 2.016093  |

---

### TS3

HF=-2003.4869639 hartree

NIMAG=1 (-351.1719 cm<sup>-1</sup>)

|                                              |              |
|----------------------------------------------|--------------|
| Zero-point correction=                       | 0.344919     |
| (Hartree/Particle)                           |              |
| Thermal correction to Energy=                | 0.379934     |
| Thermal correction to Enthalpy=              | 0.380878     |
| Thermal correction to Gibbs Free Energy=     | 0.276676     |
| Sum of electronic and zero-point Energies=   | -2003.157499 |
| Sum of electronic and thermal Energies=      | -2003.122484 |
| Sum of electronic and thermal Enthalpies=    | -2003.121540 |
| Sum of electronic and thermal Free Energies= | -2003.225742 |

Standard orientation:

| Center<br>Number | Atomic<br>Number | Atomic<br>Type | Coordinates (Angstroms) |           |           |
|------------------|------------------|----------------|-------------------------|-----------|-----------|
|                  |                  |                | X                       | Y         | Z         |
| 1                | 6                | 0              | 1.930292                | 3.778667  | -0.441219 |
| 2                | 6                | 0              | 1.210837                | 4.487087  | 0.527465  |
| 3                | 6                | 0              | 0.476298                | 3.792943  | 1.490473  |
| 4                | 6                | 0              | 0.462286                | 2.398124  | 1.487468  |
| 5                | 6                | 0              | 1.182643                | 1.678333  | 0.520712  |
| 6                | 6                | 0              | 1.920437                | 2.386852  | -0.445952 |
| 7                | 6                | 0              | 1.143400                | 0.211149  | 0.500101  |
| 8                | 6                | 0              | 0.047557                | -0.606558 | 0.769541  |
| 9                | 6                | 0              | 0.480510                | -1.924876 | 0.372021  |
| 10               | 8                | 0              | 0.375816                | -1.771120 | -1.418342 |
| 11               | 6                | 0              | 1.293875                | -1.016939 | -1.780316 |
| 12               | 6                | 0              | 2.230337                | -0.651654 | 0.063485  |
| 13               | 7                | 0              | 1.841764                | -1.960152 | 0.475730  |
| 14               | 6                | 0              | -1.372682               | -0.210051 | 0.972552  |
| 15               | 24               | 0              | -2.664616               | 0.504178  | -0.422498 |
| 16               | 6                | 0              | -2.613052               | -1.104714 | -1.449055 |
| 17               | 8                | 0              | -2.633491               | -2.050603 | -2.107619 |
| 18               | 6                | 0              | -0.271098               | -3.219491 | 0.592080  |
| 19               | 9                | 0              | 0.183774                | -4.184679 | -0.221599 |
| 20               | 6                | 0              | 3.672016                | -0.318154 | -0.010394 |
| 21               | 6                | 0              | 4.475903                | -0.876122 | -1.015579 |
| 22               | 6                | 0              | 5.843702                | -0.600477 | -1.058069 |
| 23               | 6                | 0              | 6.419865                | 0.239009  | -0.102241 |
| 24               | 6                | 0              | 5.624423                | 0.800647  | 0.901286  |
| 25               | 6                | 0              | 4.259352                | 0.523253  | 0.948885  |
| 26               | 8                | 0              | 1.792031                | -0.527859 | -2.756205 |
| 27               | 9                | 0              | -0.095992               | -3.643833 | 1.863689  |
| 28               | 9                | 0              | -1.588566               | -3.064267 | 0.388855  |

|    |   |   |           |           |           |
|----|---|---|-----------|-----------|-----------|
| 29 | 8 | 0 | -1.808166 | -0.360111 | 2.207648  |
| 30 | 6 | 0 | -0.970692 | -0.819470 | 3.312725  |
| 31 | 6 | 0 | -2.732426 | 2.100572  | 0.606412  |
| 32 | 8 | 0 | -2.783896 | 3.054932  | 1.252886  |
| 33 | 6 | 0 | -3.921893 | 1.225259  | -1.637657 |
| 34 | 8 | 0 | -4.698193 | 1.677209  | -2.366403 |
| 35 | 6 | 0 | -4.084127 | -0.221054 | 0.618505  |
| 36 | 8 | 0 | -4.951278 | -0.664426 | 1.236160  |
| 37 | 6 | 0 | -1.280596 | 1.181238  | -1.530016 |
| 38 | 8 | 0 | -0.493841 | 1.583566  | -2.272525 |
| 39 | 1 | 0 | 2.333633  | -2.757323 | 0.080880  |
| 40 | 1 | 0 | 4.028424  | -1.505890 | -1.777437 |
| 41 | 1 | 0 | 3.643272  | 0.955845  | 1.730616  |
| 42 | 1 | 0 | 6.067776  | 1.451464  | 1.649488  |
| 43 | 1 | 0 | 6.455580  | -1.035296 | -1.843098 |
| 44 | 1 | 0 | 7.483452  | 0.457096  | -0.139368 |
| 45 | 1 | 0 | 2.451869  | 1.842452  | -1.218966 |
| 46 | 1 | 0 | -0.105084 | 1.869338  | 2.246268  |
| 47 | 1 | 0 | -0.090822 | 4.332535  | 2.242768  |
| 48 | 1 | 0 | 2.493268  | 4.312700  | -1.201134 |
| 49 | 1 | 0 | 1.220793  | 5.573228  | 0.527850  |
| 50 | 1 | 0 | -1.560792 | -0.620964 | 4.206087  |
| 51 | 1 | 0 | -0.030167 | -0.266803 | 3.335679  |
| 52 | 1 | 0 | -0.780552 | -1.886721 | 3.207633  |

---

**TS1-Ag**

HF=-2846.1270972 hartree

NIMAG=1 (-352.2148 cm<sup>-1</sup>)



Zero-point correction= 0.688243  
 (Hartree/Particle)  
 Thermal correction to Energy= 0.745895  
 Thermal correction to Enthalpy= 0.746839  
 Thermal correction to Gibbs Free Energy= 0.586179  
 Sum of electronic and zero-point Energies= -2845.438855  
 Sum of electronic and thermal Energies= -2845.381202  
 Sum of electronic and thermal Enthalpies= -2845.380258  
 Sum of electronic and thermal Free Energies= -2845.540918

Standard orientation:

| -----  |        |        |                         |           |           |  |
|--------|--------|--------|-------------------------|-----------|-----------|--|
| Center | Atomic | Atomic | Coordinates (Angstroms) |           |           |  |
| Number | Number | Type   | X                       | Y         | Z         |  |
| -----  |        |        |                         |           |           |  |
| 1      | 6      | 0      | -2.227577               | -5.343696 | 1.568292  |  |
| 2      | 6      | 0      | -2.408800               | -3.821879 | 1.555135  |  |
| 3      | 8      | 0      | -1.496136               | -3.326555 | 0.543422  |  |
| 4      | 6      | 0      | -0.705573               | -4.408342 | 0.000860  |  |
| 5      | 6      | 0      | -0.788881               | -5.512556 | 1.050417  |  |
| 6      | 47     | 0      | -1.516388               | -0.986561 | 0.050941  |  |
| 7      | 8      | 0      | -3.999582               | -1.560080 | -0.593111 |  |
| 8      | 6      | 0      | -3.924279               | -2.567725 | -1.621249 |  |
| 9      | 6      | 0      | -3.563776               | -1.805688 | -2.911509 |  |
| 10     | 6      | 0      | -4.021789               | -0.347996 | -2.618884 |  |
| 11     | 6      | 0      | -4.658028               | -0.445559 | -1.223170 |  |
| 12     | 7      | 0      | -0.626877               | 0.526709  | -1.475539 |  |
| 13     | 6      | 0      | 0.303549                | 0.180360  | -2.297904 |  |
| 14     | 6      | 0      | 1.327858                | 0.912072  | 0.557443  |  |
| 15     | 6      | 0      | 0.830770                | 2.041492  | 0.257040  |  |
| 16     | 6      | 0      | -0.492204               | 1.927652  | -1.305624 |  |
| 17     | 6      | 0      | 0.470486                | 2.384495  | -2.311246 |  |

|    |    |   |           |           |           |
|----|----|---|-----------|-----------|-----------|
| 18 | 8  | 0 | 1.012716  | 1.172888  | -2.858051 |
| 19 | 6  | 0 | 0.564040  | -1.202662 | -2.835722 |
| 20 | 9  | 0 | -0.142825 | -1.411124 | -3.968275 |
| 21 | 6  | 0 | -1.659827 | 2.735832  | -0.883915 |
| 22 | 6  | 0 | -1.892652 | 4.007846  | -1.430720 |
| 23 | 6  | 0 | -2.981944 | 4.772609  | -1.009404 |
| 24 | 6  | 0 | -3.856514 | 4.287341  | -0.036084 |
| 25 | 6  | 0 | -3.622785 | 3.028716  | 0.526045  |
| 26 | 6  | 0 | -2.531714 | 2.265799  | 0.112985  |
| 27 | 6  | 0 | 1.809345  | -0.312197 | 0.860017  |
| 28 | 8  | 0 | 0.858785  | -1.040875 | 1.531233  |
| 29 | 6  | 0 | 1.171917  | -2.272088 | 2.181018  |
| 30 | 6  | 0 | 0.957336  | 3.445726  | 0.619104  |
| 31 | 6  | 0 | 0.025076  | 4.081596  | 1.459254  |
| 32 | 6  | 0 | 0.182354  | 5.425249  | 1.793084  |
| 33 | 6  | 0 | 1.264615  | 6.153269  | 1.288791  |
| 34 | 6  | 0 | 2.194734  | 5.530564  | 0.451492  |
| 35 | 6  | 0 | 2.042977  | 4.186013  | 0.115064  |
| 36 | 8  | 0 | 0.886474  | 3.456770  | -2.677207 |
| 37 | 9  | 0 | 1.862603  | -1.367730 | -3.123937 |
| 38 | 9  | 0 | 0.195350  | -2.151309 | -1.952568 |
| 39 | 24 | 0 | 3.851816  | -0.799872 | 0.368935  |
| 40 | 6  | 0 | 3.756121  | 0.261693  | -1.206047 |
| 41 | 8  | 0 | 3.810721  | 0.939443  | -2.140290 |
| 42 | 6  | 0 | 5.611564  | -1.166168 | -0.098460 |
| 43 | 8  | 0 | 6.711030  | -1.404119 | -0.394214 |
| 44 | 6  | 0 | 4.174513  | -1.785872 | 1.946315  |
| 45 | 8  | 0 | 4.465071  | -2.382037 | 2.897239  |
| 46 | 6  | 0 | 4.265789  | 0.785599  | 1.326813  |
| 47 | 8  | 0 | 4.473104  | 1.763194  | 1.907114  |
| 48 | 6  | 0 | 3.175760  | -2.333173 | -0.498668 |
| 49 | 8  | 0 | 2.738018  | -3.285846 | -0.992808 |

|    |   |   |           |           |           |
|----|---|---|-----------|-----------|-----------|
| 50 | 8 | 0 | -2.226515 | -0.450047 | 2.336670  |
| 51 | 6 | 0 | -3.628054 | -0.324002 | 2.680021  |
| 52 | 6 | 0 | -3.671643 | 0.521212  | 3.957071  |
| 53 | 6 | 0 | -2.404165 | 1.381904  | 3.820387  |
| 54 | 6 | 0 | -1.420286 | 0.397206  | 3.194899  |
| 55 | 1 | 0 | -0.817801 | 3.517962  | 1.844082  |
| 56 | 1 | 0 | 2.757098  | 3.694549  | -0.537342 |
| 57 | 1 | 0 | 3.038189  | 6.091932  | 0.059446  |
| 58 | 1 | 0 | -0.541148 | 5.905159  | 2.446376  |
| 59 | 1 | 0 | 1.383141  | 7.201634  | 1.548745  |
| 60 | 1 | 0 | -1.214463 | 4.402967  | -2.177442 |
| 61 | 1 | 0 | -2.334716 | 1.316478  | 0.600784  |
| 62 | 1 | 0 | -4.286258 | 2.644751  | 1.296346  |
| 63 | 1 | 0 | -3.143827 | 5.753834  | -1.446883 |
| 64 | 1 | 0 | -4.703566 | 4.884289  | 0.289484  |
| 65 | 1 | 0 | 0.207866  | -2.694942 | 2.463407  |
| 66 | 1 | 0 | 1.777362  | -2.093773 | 3.073564  |
| 67 | 1 | 0 | 1.691636  | -2.961279 | 1.512491  |
| 68 | 1 | 0 | -4.044036 | -1.328768 | 2.798808  |
| 69 | 1 | 0 | -4.143584 | 0.168197  | 1.845866  |
| 70 | 1 | 0 | -0.936562 | -0.233223 | 3.951980  |
| 71 | 1 | 0 | -0.647176 | 0.858824  | 2.578979  |
| 72 | 1 | 0 | -3.600283 | -0.119450 | 4.843261  |
| 73 | 1 | 0 | -4.590760 | 1.109106  | 4.033006  |
| 74 | 1 | 0 | -2.046686 | 1.781316  | 4.773471  |
| 75 | 1 | 0 | -2.582546 | 2.222372  | 3.139136  |
| 76 | 1 | 0 | -3.177782 | -3.296367 | -1.301347 |
| 77 | 1 | 0 | -4.902325 | -3.062621 | -1.708961 |
| 78 | 1 | 0 | -4.497150 | 0.434656  | -0.598662 |
| 79 | 1 | 0 | -5.736792 | -0.652885 | -1.284421 |
| 80 | 1 | 0 | -3.160352 | 0.325200  | -2.586803 |
| 81 | 1 | 0 | -4.726744 | 0.034420  | -3.362221 |

|    |   |   |           |           |           |
|----|---|---|-----------|-----------|-----------|
| 82 | 1 | 0 | -4.065754 | -2.236094 | -3.782705 |
| 83 | 1 | 0 | -2.487035 | -1.841543 | -3.094837 |
| 84 | 1 | 0 | -1.142695 | -4.725813 | -0.956249 |
| 85 | 1 | 0 | 0.301561  | -4.028486 | -0.180416 |
| 86 | 1 | 0 | -2.133628 | -3.356462 | 2.508488  |
| 87 | 1 | 0 | -3.418881 | -3.498372 | 1.287360  |
| 88 | 1 | 0 | -0.066241 | -5.324319 | 1.852950  |
| 89 | 1 | 0 | -0.592151 | -6.504169 | 0.633837  |
| 90 | 1 | 0 | -2.934858 | -5.818570 | 0.878817  |
| 91 | 1 | 0 | -2.381784 | -5.770462 | 2.563096  |

---

**INT1-Ag**

HF=-2846.1428652 hartree

|                                              |              |
|----------------------------------------------|--------------|
| Zero-point correction=                       | 0.690068     |
| (Hartree/Particle)                           |              |
| Thermal correction to Energy=                | 0.747971     |
| Thermal correction to Enthalpy=              | 0.748915     |
| Thermal correction to Gibbs Free Energy=     | 0.586432     |
| Sum of electronic and zero-point Energies=   | -2845.452797 |
| Sum of electronic and thermal Energies=      | -2845.394894 |
| Sum of electronic and thermal Enthalpies=    | -2845.393950 |
| Sum of electronic and thermal Free Energies= | -2845.556434 |

Standard orientation:

---

| Center | Atomic | Atomic | Coordinates (Angstroms) |           |           |
|--------|--------|--------|-------------------------|-----------|-----------|
| Number | Number | Type   | X                       | Y         | Z         |
| 1      | 6      | 0      | 3.585427                | -4.246235 | -2.077886 |

---

|    |    |   |           |           |           |
|----|----|---|-----------|-----------|-----------|
| 2  | 6  | 0 | 3.291135  | -2.772132 | -1.776404 |
| 3  | 8  | 0 | 2.341099  | -2.773398 | -0.680256 |
| 4  | 6  | 0 | 1.985666  | -4.128505 | -0.326787 |
| 5  | 6  | 0 | 2.317514  | -4.952032 | -1.567656 |
| 6  | 47 | 0 | 1.422758  | -0.627352 | -0.136701 |
| 7  | 8  | 0 | 3.948338  | -0.284836 | 0.510975  |
| 8  | 6  | 0 | 4.437979  | -1.299986 | 1.412684  |
| 9  | 6  | 0 | 4.366558  | -0.695265 | 2.838510  |
| 10 | 6  | 0 | 3.957481  | 0.778773  | 2.596275  |
| 11 | 6  | 0 | 4.271319  | 0.977787  | 1.113381  |
| 12 | 7  | 0 | 0.293236  | 0.820024  | 1.371257  |
| 13 | 6  | 0 | -0.128554 | 0.529576  | 2.533797  |
| 14 | 6  | 0 | -1.455678 | 0.421099  | -0.700538 |
| 15 | 6  | 0 | -1.365563 | 1.670902  | -0.286266 |
| 16 | 6  | 0 | -0.458743 | 2.021938  | 0.933101  |
| 17 | 6  | 0 | -1.375740 | 2.302158  | 2.129205  |
| 18 | 8  | 0 | -1.093807 | 1.298114  | 3.092039  |
| 19 | 6  | 0 | 0.374761  | -0.596938 | 3.415050  |
| 20 | 9  | 0 | 1.030890  | -0.080364 | 4.470614  |
| 21 | 6  | 0 | 0.528185  | 3.160913  | 0.657341  |
| 22 | 6  | 0 | 0.509095  | 4.366336  | 1.364143  |
| 23 | 6  | 0 | 1.423123  | 5.378849  | 1.054012  |
| 24 | 6  | 0 | 2.361902  | 5.196385  | 0.039394  |
| 25 | 6  | 0 | 2.383923  | 3.990580  | -0.669150 |
| 26 | 6  | 0 | 1.473507  | 2.980147  | -0.362905 |
| 27 | 6  | 0 | -1.566191 | -0.845718 | -1.045120 |
| 28 | 8  | 0 | -0.578389 | -1.268613 | -1.940776 |
| 29 | 6  | 0 | -0.623669 | -2.574716 | -2.488754 |
| 30 | 6  | 0 | -2.209342 | 2.769275  | -0.856299 |
| 31 | 6  | 0 | -1.668293 | 3.877292  | -1.529503 |
| 32 | 6  | 0 | -2.503760 | 4.854738  | -2.074020 |
| 33 | 6  | 0 | -3.891481 | 4.744527  | -1.955437 |

|    |    |   |           |           |           |
|----|----|---|-----------|-----------|-----------|
| 34 | 6  | 0 | -4.440850 | 3.645392  | -1.289969 |
| 35 | 6  | 0 | -3.606452 | 2.669562  | -0.744657 |
| 36 | 8  | 0 | -2.199175 | 3.140447  | 2.331955  |
| 37 | 9  | 0 | -0.649730 | -1.330810 | 3.866117  |
| 38 | 9  | 0 | 1.222681  | -1.393945 | 2.747288  |
| 39 | 24 | 0 | -3.156201 | -2.008942 | -0.056541 |
| 40 | 6  | 0 | -3.387387 | -0.627797 | 1.206286  |
| 41 | 8  | 0 | -3.594496 | 0.191814  | 2.000279  |
| 42 | 6  | 0 | -4.474719 | -2.913679 | 0.874279  |
| 43 | 8  | 0 | -5.296655 | -3.487894 | 1.467135  |
| 44 | 6  | 0 | -3.190019 | -3.502822 | -1.215074 |
| 45 | 8  | 0 | -3.312035 | -4.458583 | -1.861011 |
| 46 | 6  | 0 | -4.259802 | -1.066611 | -1.271951 |
| 47 | 8  | 0 | -4.871471 | -0.453677 | -2.039125 |
| 48 | 6  | 0 | -1.676931 | -2.680930 | 0.876295  |
| 49 | 8  | 0 | -0.707215 | -3.041828 | 1.404108  |
| 50 | 8  | 0 | 2.150427  | 0.339888  | -2.332517 |
| 51 | 6  | 0 | 3.485846  | 0.820297  | -2.611226 |
| 52 | 6  | 0 | 3.399934  | 1.560052  | -3.952682 |
| 53 | 6  | 0 | 1.923132  | 1.985514  | -4.004669 |
| 54 | 6  | 0 | 1.230877  | 0.789924  | -3.356021 |
| 55 | 1  | 0 | -0.594402 | 3.969474  | -1.643751 |
| 56 | 1  | 0 | -4.032021 | 1.820040  | -0.220873 |
| 57 | 1  | 0 | -5.518863 | 3.548238  | -1.191718 |
| 58 | 1  | 0 | -2.067286 | 5.700699  | -2.598810 |
| 59 | 1  | 0 | -4.539128 | 5.506651  | -2.380532 |
| 60 | 1  | 0 | -0.224252 | 4.540448  | 2.142721  |
| 61 | 1  | 0 | 1.482918  | 2.056887  | -0.930267 |
| 62 | 1  | 0 | 3.106090  | 3.839953  | -1.466475 |
| 63 | 1  | 0 | 1.391828  | 6.312272  | 1.608422  |
| 64 | 1  | 0 | 3.067816  | 5.985643  | -0.202255 |
| 65 | 1  | 0 | 0.278204  | -2.665582 | -3.099518 |

|    |   |   |           |           |           |
|----|---|---|-----------|-----------|-----------|
| 66 | 1 | 0 | -1.506509 | -2.716723 | -3.121188 |
| 67 | 1 | 0 | -0.605480 | -3.343031 | -1.709485 |
| 68 | 1 | 0 | 4.166985  | -0.034884 | -2.627946 |
| 69 | 1 | 0 | 3.785804  | 1.480376  | -1.789402 |
| 70 | 1 | 0 | 1.065942  | -0.026028 | -4.071550 |
| 71 | 1 | 0 | 0.283392  | 1.021417  | -2.867668 |
| 72 | 1 | 0 | 3.623959  | 0.876886  | -4.779767 |
| 73 | 1 | 0 | 4.097573  | 2.400773  | -4.008215 |
| 74 | 1 | 0 | 1.564281  | 2.180237  | -5.019158 |
| 75 | 1 | 0 | 1.758244  | 2.886702  | -3.402688 |
| 76 | 1 | 0 | 3.810990  | -2.180609 | 1.264250  |
| 77 | 1 | 0 | 5.472243  | -1.548432 | 1.137910  |
| 78 | 1 | 0 | 3.667359  | 1.742886  | 0.623241  |
| 79 | 1 | 0 | 5.337859  | 1.201927  | 0.954354  |
| 80 | 1 | 0 | 2.884371  | 0.912521  | 2.761923  |
| 81 | 1 | 0 | 4.491329  | 1.483853  | 3.239718  |
| 82 | 1 | 0 | 5.338328  | -0.763753 | 3.335733  |
| 83 | 1 | 0 | 3.633187  | -1.210110 | 3.461807  |
| 84 | 1 | 0 | 2.586929  | -4.443350 | 0.538114  |
| 85 | 1 | 0 | 0.933063  | -4.131608 | -0.043091 |
| 86 | 1 | 0 | 2.822254  | -2.252037 | -2.618854 |
| 87 | 1 | 0 | 4.170796  | -2.204094 | -1.460337 |
| 88 | 1 | 0 | 1.508328  | -4.867784 | -2.302126 |
| 89 | 1 | 0 | 2.472641  | -6.010657 | -1.341913 |
| 90 | 1 | 0 | 4.459538  | -4.586190 | -1.510824 |
| 91 | 1 | 0 | 3.779540  | -4.420336 | -3.139918 |

---

**TS2-Ag**

HF=-2846.1282252 hartree

NIMAG=1 (-276.7417 cm<sup>-1</sup>)

Zero-point correction= 0.691513  
 (Hartree/Particle)  
 Thermal correction to Energy= 0.747424  
 Thermal correction to Enthalpy= 0.748368  
 Thermal correction to Gibbs Free Energy= 0.595672  
 Sum of electronic and zero-point Energies= -2845.436712  
 Sum of electronic and thermal Energies= -2845.380802  
 Sum of electronic and thermal Enthalpies= -2845.379857  
 Sum of electronic and thermal Free Energies= -2845.532553

Standard orientation:

| -----  |        |        |                         |           |           |  |
|--------|--------|--------|-------------------------|-----------|-----------|--|
| Center | Atomic | Atomic | Coordinates (Angstroms) |           |           |  |
| Number | Number | Type   | X                       | Y         | Z         |  |
| -----  |        |        |                         |           |           |  |
| 1      | 6      | 0      | -0.497477               | 1.271481  | -1.431880 |  |
| 2      | 6      | 0      | 0.161482                | -0.720441 | -1.788107 |  |
| 3      | 6      | 0      | 0.594691                | 1.298793  | -0.233151 |  |
| 4      | 6      | 0      | 1.193506                | 0.124945  | -0.086513 |  |
| 5      | 7      | 0      | -0.950946               | -0.114069 | -1.439992 |  |
| 6      | 6      | 0      | 0.248879                | -2.232527 | -1.952032 |  |
| 7      | 8      | 0      | 0.916485                | -0.007579 | -2.738116 |  |
| 8      | 6      | 0      | 0.449767                | 1.298513  | -2.629119 |  |
| 9      | 8      | 0      | 0.842575                | 2.187246  | -3.336197 |  |
| 10     | 47     | 0      | -2.203288               | -0.841590 | 0.292629  |  |
| 11     | 8      | 0      | -4.668463               | -0.739147 | -0.434177 |  |
| 12     | 8      | 0      | -2.785605               | -2.976511 | 1.471414  |  |
| 13     | 8      | 0      | -2.269182               | 0.291896  | 2.462192  |  |
| 14     | 6      | 0      | -2.005743               | -4.107855 | 1.025842  |  |
| 15     | 1      | 0      | -1.964560               | -4.075122 | -0.061751 |  |
| 16     | 1      | 0      | -2.514928               | -5.029061 | 1.342063  |  |
| 17     | 6      | 0      | -2.500233               | -2.886617 | 2.883956  |  |



|    |   |   |           |           |           |
|----|---|---|-----------|-----------|-----------|
| 18 | 1 | 0 | -2.838120 | -1.908884 | 3.225514  |
| 19 | 1 | 0 | -3.057100 | -3.677531 | 3.406005  |
| 20 | 6 | 0 | -0.981519 | -3.101166 | 2.984350  |
| 21 | 1 | 0 | -0.465388 | -2.139412 | 2.936020  |
| 22 | 1 | 0 | -0.701148 | -3.594657 | 3.919243  |
| 23 | 6 | 0 | -0.644426 | -3.949733 | 1.724615  |
| 24 | 1 | 0 | 0.057555  | -3.416795 | 1.078589  |
| 25 | 1 | 0 | -0.205789 | -4.920312 | 1.972648  |
| 26 | 6 | 0 | -4.838994 | 0.190797  | -1.524005 |
| 27 | 1 | 0 | -4.312941 | 1.108550  | -1.261695 |
| 28 | 1 | 0 | -5.911202 | 0.408795  | -1.637170 |
| 29 | 6 | 0 | -5.005444 | -2.025538 | -0.990873 |
| 30 | 1 | 0 | -4.624018 | -2.783597 | -0.304407 |
| 31 | 1 | 0 | -6.100285 | -2.110297 | -1.056486 |
| 32 | 6 | 0 | -4.278422 | -0.528223 | -2.765204 |
| 33 | 1 | 0 | -4.856563 | -0.286363 | -3.661646 |
| 34 | 1 | 0 | -3.240403 | -0.230995 | -2.935536 |
| 35 | 6 | 0 | -4.359975 | -2.035313 | -2.387951 |
| 36 | 1 | 0 | -3.357530 | -2.469593 | -2.340608 |
| 37 | 1 | 0 | -4.948932 | -2.620258 | -3.100354 |
| 38 | 6 | 0 | -1.134167 | 0.603658  | 3.295297  |
| 39 | 1 | 0 | -1.130176 | -0.057978 | 4.174097  |
| 40 | 1 | 0 | -0.238837 | 0.413038  | 2.701528  |
| 41 | 6 | 0 | -3.418770 | 1.043334  | 2.921572  |
| 42 | 1 | 0 | -4.125263 | 0.355874  | 3.401009  |
| 43 | 1 | 0 | -3.894711 | 1.469603  | 2.034515  |
| 44 | 6 | 0 | -2.879498 | 2.110554  | 3.898707  |
| 45 | 1 | 0 | -3.132913 | 1.845035  | 4.929994  |
| 46 | 1 | 0 | -3.297130 | 3.100594  | 3.695706  |
| 47 | 6 | 0 | -1.352184 | 2.059916  | 3.691087  |
| 48 | 1 | 0 | -1.039526 | 2.717786  | 2.874415  |
| 49 | 1 | 0 | -0.790793 | 2.341972  | 4.586237  |

|    |    |   |           |           |           |
|----|----|---|-----------|-----------|-----------|
| 50 | 6  | 0 | 2.179571  | -0.578172 | 0.561854  |
| 51 | 8  | 0 | 1.680015  | -1.195120 | 1.655327  |
| 52 | 6  | 0 | 2.485667  | -2.079517 | 2.445461  |
| 53 | 1  | 0 | 1.863041  | -2.352287 | 3.298205  |
| 54 | 1  | 0 | 3.392525  | -1.581940 | 2.794312  |
| 55 | 1  | 0 | 2.739377  | -2.975289 | 1.874857  |
| 56 | 24 | 0 | 4.182346  | -0.408809 | -0.171247 |
| 57 | 6  | 0 | 4.792913  | -2.066440 | 0.498841  |
| 58 | 8  | 0 | 5.250614  | -3.073207 | 0.844616  |
| 59 | 6  | 0 | 4.488315  | 0.466349  | 1.477724  |
| 60 | 8  | 0 | 4.640705  | 0.993164  | 2.497150  |
| 61 | 6  | 0 | 5.929359  | -0.122801 | -0.748220 |
| 62 | 8  | 0 | 7.024068  | 0.054209  | -1.094208 |
| 63 | 6  | 0 | 3.688725  | -1.310526 | -1.765896 |
| 64 | 8  | 0 | 3.409229  | -1.871000 | -2.736399 |
| 65 | 6  | 0 | 3.740307  | 1.246787  | -1.006623 |
| 66 | 8  | 0 | 3.546473  | 2.241719  | -1.558237 |
| 67 | 9  | 0 | 0.612982  | -2.562006 | -3.197362 |
| 68 | 9  | 0 | -0.960752 | -2.793553 | -1.712989 |
| 69 | 9  | 0 | 1.118690  | -2.801652 | -1.096737 |
| 70 | 6  | 0 | 0.983312  | 2.553973  | 0.438006  |
| 71 | 6  | 0 | 1.835780  | 4.920328  | 1.721846  |
| 72 | 6  | 0 | 0.842904  | 3.806042  | -0.188613 |
| 73 | 6  | 0 | 1.575607  | 2.513786  | 1.715376  |
| 74 | 6  | 0 | 1.995624  | 3.681168  | 2.349232  |
| 75 | 6  | 0 | 1.263728  | 4.973410  | 0.448452  |
| 76 | 1  | 0 | 0.428799  | 3.865097  | -1.188710 |
| 77 | 1  | 0 | 1.708956  | 1.557897  | 2.210408  |
| 78 | 1  | 0 | 2.449123  | 3.620493  | 3.334840  |
| 79 | 1  | 0 | 1.149930  | 5.927695  | -0.058762 |
| 80 | 1  | 0 | 2.160437  | 5.831574  | 2.216289  |
| 81 | 6  | 0 | -1.627058 | 2.265685  | -1.377241 |

|    |   |   |           |          |           |
|----|---|---|-----------|----------|-----------|
| 82 | 6 | 0 | -3.849360 | 3.975466 | -1.246885 |
| 83 | 6 | 0 | -2.166027 | 2.813747 | -2.546468 |
| 84 | 6 | 0 | -2.212223 | 2.577827 | -0.142910 |
| 85 | 6 | 0 | -3.315476 | 3.429290 | -0.076310 |
| 86 | 6 | 0 | -3.272733 | 3.664043 | -2.480563 |
| 87 | 1 | 0 | -1.719413 | 2.584111 | -3.507984 |
| 88 | 1 | 0 | -1.800109 | 2.153101 | 0.764483  |
| 89 | 1 | 0 | -3.753475 | 3.670262 | 0.888287  |
| 90 | 1 | 0 | -3.682439 | 4.082904 | -3.395247 |
| 91 | 1 | 0 | -4.707257 | 4.640029 | -1.197628 |

**4r**

HF=-1814.9967867 hartree

|                                              |              |
|----------------------------------------------|--------------|
| Zero-point correction=                       | 0.331317     |
| (Hartree/Particle)                           |              |
| Thermal correction to Energy=                | 0.364649     |
| Thermal correction to Enthalpy=              | 0.365593     |
| Thermal correction to Gibbs Free Energy=     | 0.263963     |
| Sum of electronic and zero-point Energies=   | -1814.665470 |
| Sum of electronic and thermal Energies=      | -1814.632138 |
| Sum of electronic and thermal Enthalpies=    | -1814.631194 |
| Sum of electronic and thermal Free Energies= | -1814.732824 |

Standard orientation:

| Center<br>Number | Atomic<br>Number | Atomic<br>Type | Coordinates (Angstroms) |           |          |
|------------------|------------------|----------------|-------------------------|-----------|----------|
|                  |                  |                | X                       | Y         | Z        |
| 1                | 6                | 0              | 0.403012                | 2.020491  | 0.481054 |
| 2                | 6                | 0              | 0.078439                | 0.692535  | 0.713010 |
| 3                | 6                | 0              | 1.263617                | -0.076399 | 0.472192 |

|    |   |   |           |           |           |
|----|---|---|-----------|-----------|-----------|
| 4  | 6 | 0 | 2.270398  | 0.822979  | 0.103150  |
| 5  | 7 | 0 | 1.716588  | 2.077736  | 0.089728  |
| 6  | 1 | 0 | 2.233875  | 2.936346  | -0.042768 |
| 7  | 6 | 0 | -0.470967 | 3.210987  | 0.386397  |
| 8  | 9 | 0 | -1.000769 | 3.376579  | -0.853551 |
| 9  | 9 | 0 | -1.518246 | 3.117900  | 1.241573  |
| 10 | 9 | 0 | 0.209765  | 4.345917  | 0.668820  |
| 11 | 6 | 0 | 3.691706  | 0.618041  | -0.203662 |
| 12 | 6 | 0 | 6.420500  | 0.257298  | -0.774585 |
| 13 | 6 | 0 | 4.447700  | -0.337404 | 0.498285  |
| 14 | 6 | 0 | 4.323043  | 1.388833  | -1.195763 |
| 15 | 6 | 0 | 5.678521  | 1.211960  | -1.474453 |
| 16 | 6 | 0 | 5.799112  | -0.517239 | 0.210210  |
| 17 | 1 | 0 | 3.971781  | -0.930991 | 1.271594  |
| 18 | 1 | 0 | 3.745333  | 2.109937  | -1.768119 |
| 19 | 1 | 0 | 6.150965  | 1.812733  | -2.246458 |
| 20 | 1 | 0 | 6.370822  | -1.258268 | 0.761803  |
| 21 | 1 | 0 | 7.474690  | 0.116204  | -0.995440 |
| 22 | 6 | 0 | 1.364583  | -1.546528 | 0.532930  |
| 23 | 6 | 0 | 1.561230  | -4.351069 | 0.632567  |
| 24 | 6 | 0 | 0.894903  | -2.258928 | 1.648208  |
| 25 | 6 | 0 | 1.927263  | -2.263735 | -0.537081 |
| 26 | 6 | 0 | 2.027667  | -3.652760 | -0.485332 |
| 27 | 6 | 0 | 0.991221  | -3.650026 | 1.697054  |
| 28 | 1 | 0 | 0.460679  | -1.721369 | 2.485752  |
| 29 | 1 | 0 | 2.279537  | -1.721643 | -1.409402 |
| 30 | 1 | 0 | 2.463063  | -4.191916 | -1.322199 |
| 31 | 1 | 0 | 0.622481  | -4.184500 | 2.568185  |
| 32 | 1 | 0 | 1.636701  | -5.434165 | 0.670213  |
| 33 | 6 | 0 | -1.284053 | 0.147267  | 0.937984  |
| 34 | 8 | 0 | -1.719440 | 0.175849  | 2.176716  |
| 35 | 6 | 0 | -0.960335 | 0.753583  | 3.281015  |

|    |    |   |           |           |           |
|----|----|---|-----------|-----------|-----------|
| 36 | 1  | 0 | 0.081578  | 0.432004  | 3.246002  |
| 37 | 1  | 0 | -1.452338 | 0.387548  | 4.180900  |
| 38 | 1  | 0 | -1.024591 | 1.839677  | 3.218462  |
| 39 | 24 | 0 | -2.467607 | -0.500627 | -0.570066 |
| 40 | 6  | 0 | -3.767153 | -1.022301 | 0.714974  |
| 41 | 8  | 0 | -4.562981 | -1.349838 | 1.483867  |
| 42 | 6  | 0 | -1.771084 | -2.277585 | -0.506023 |
| 43 | 8  | 0 | -1.420125 | -3.375288 | -0.495663 |
| 44 | 6  | 0 | -3.593778 | -1.017503 | -1.997791 |
| 45 | 8  | 0 | -4.287706 | -1.328731 | -2.870250 |
| 46 | 6  | 0 | -1.121705 | 0.001615  | -1.817760 |
| 47 | 8  | 0 | -0.311185 | 0.289995  | -2.587493 |
| 48 | 6  | 0 | -3.253208 | 1.230712  | -0.607868 |
| 49 | 8  | 0 | -3.767145 | 2.263863  | -0.623290 |

---

#### 4r-Ag

HF=-2657.6437016 hartree

|                                              |              |
|----------------------------------------------|--------------|
| Zero-point correction=<br>(Hartree/Particle) | 0.678056     |
| Thermal correction to Energy=                | 0.732402     |
| Thermal correction to Enthalpy=              | 0.733347     |
| Thermal correction to Gibbs Free Energy=     | 0.580732     |
| Sum of electronic and zero-point Energies=   | -2656.965645 |
| Sum of electronic and thermal Energies=      | -2656.911299 |
| Sum of electronic and thermal Enthalpies=    | -2656.910355 |
| Sum of electronic and thermal Free Energies= | -2657.062969 |

## Standard orientation:

| Center<br>Number | Atomic<br>Number | Atomic<br>Type | Coordinates (Angstroms) |           |           |
|------------------|------------------|----------------|-------------------------|-----------|-----------|
|                  |                  |                | X                       | Y         | Z         |
| 1                | 6                | 0              | 2.760738                | 3.777998  | 0.890733  |
| 2                | 6                | 0              | 2.595172                | 4.935409  | 0.126581  |
| 3                | 6                | 0              | 1.608384                | 4.967773  | -0.863988 |
| 4                | 6                | 0              | 0.799171                | 3.853468  | -1.085975 |
| 5                | 6                | 0              | 0.961303                | 2.678896  | -0.328841 |
| 6                | 6                | 0              | 1.954796                | 2.659090  | 0.666216  |
| 7                | 6                | 0              | 0.092237                | 1.510855  | -0.587222 |
| 8                | 6                | 0              | -1.317836               | 1.486208  | -0.679323 |
| 9                | 6                | 0              | -1.663041               | 0.151944  | -1.044075 |
| 10               | 6                | 0              | -0.449461               | -0.536613 | -1.161731 |
| 11               | 7                | 0              | 0.605603                | 0.278363  | -0.866003 |
| 12               | 6                | 0              | -0.207273               | -1.950082 | -1.509043 |
| 13               | 9                | 0              | 0.677865                | -2.092621 | -2.540233 |
| 14               | 6                | 0              | -2.251775               | 2.604844  | -0.467081 |
| 15               | 6                | 0              | -2.082520               | 3.499483  | 0.606938  |
| 16               | 6                | 0              | -2.972814               | 4.552323  | 0.809377  |
| 17               | 6                | 0              | -4.061678               | 4.733155  | -0.050694 |
| 18               | 6                | 0              | -4.244238               | 3.852625  | -1.118705 |
| 19               | 6                | 0              | -3.345453               | 2.805327  | -1.328285 |
| 20               | 6                | 0              | -3.025109               | -0.414795 | -1.172433 |
| 21               | 24               | 0              | -4.123176               | -0.932818 | 0.504258  |
| 22               | 6                | 0              | -3.029619               | 0.195034  | 1.593932  |
| 23               | 8                | 0              | -2.410222               | 0.792439  | 2.362556  |
| 24               | 47               | 0              | 2.615327                | -0.471595 | -0.366372 |
| 25               | 8                | 0              | 4.780682                | 0.651947  | -0.308452 |
| 26               | 6                | 0              | 5.050105                | 1.822340  | -1.124653 |
| 27               | 6                | 0              | 6.033096                | 2.693352  | -0.320195 |

|    |   |   |           |           |           |
|----|---|---|-----------|-----------|-----------|
| 28 | 6 | 0 | 6.558666  | 1.732300  | 0.763422  |
| 29 | 6 | 0 | 5.344536  | 0.841808  | 1.004653  |
| 30 | 9 | 0 | -1.339921 | -2.598767 | -1.863091 |
| 31 | 9 | 0 | 0.349237  | -2.676764 | -0.482965 |
| 32 | 8 | 0 | 4.042872  | -2.388076 | 0.171805  |
| 33 | 6 | 0 | 3.360404  | -3.658928 | 0.096139  |
| 34 | 6 | 0 | 3.375144  | -4.028991 | -1.396481 |
| 35 | 6 | 0 | 4.599326  | -3.247534 | -1.956860 |
| 36 | 6 | 0 | 5.168733  | -2.529104 | -0.722325 |
| 37 | 8 | 0 | -3.273706 | -0.529712 | -2.458449 |
| 38 | 6 | 0 | -4.516014 | -1.053253 | -2.973893 |
| 39 | 6 | 0 | -5.270319 | -2.184138 | -0.327062 |
| 40 | 8 | 0 | -6.007006 | -2.983335 | -0.726300 |
| 41 | 6 | 0 | -5.343959 | 0.464198  | 0.087783  |
| 42 | 8 | 0 | -6.109753 | 1.282984  | -0.187066 |
| 43 | 6 | 0 | -5.033331 | -1.339405 | 2.096709  |
| 44 | 8 | 0 | -5.599346 | -1.584448 | 3.077644  |
| 45 | 6 | 0 | -2.887778 | -2.348181 | 0.776834  |
| 46 | 8 | 0 | -2.160219 | -3.227816 | 0.949855  |
| 47 | 8 | 0 | 2.130256  | -0.286091 | 2.295506  |
| 48 | 6 | 0 | 0.738520  | -0.205965 | 2.646789  |
| 49 | 6 | 0 | 0.300537  | -1.664437 | 2.775017  |
| 50 | 6 | 0 | 1.556471  | -2.351962 | 3.365883  |
| 51 | 6 | 0 | 2.699254  | -1.339803 | 3.093664  |
| 52 | 1 | 0 | 2.363465  | -3.525302 | 0.514403  |
| 53 | 1 | 0 | 3.915728  | -4.389010 | 0.701755  |
| 54 | 1 | 0 | 5.557342  | -1.527857 | -0.908105 |
| 55 | 1 | 0 | 5.935965  | -3.137883 | -0.222675 |
| 56 | 1 | 0 | 4.278813  | -2.517327 | -2.706750 |
| 57 | 1 | 0 | 5.343101  | -3.901267 | -2.421001 |
| 58 | 1 | 0 | 2.451941  | -3.693930 | -1.873478 |
| 59 | 1 | 0 | 3.462815  | -5.109521 | -1.540410 |

|    |   |   |           |           |           |
|----|---|---|-----------|-----------|-----------|
| 60 | 1 | 0 | 0.226672  | 0.347076  | 1.858339  |
| 61 | 1 | 0 | 0.628177  | 0.336457  | 3.598832  |
| 62 | 1 | 0 | 3.530624  | -1.756191 | 2.521676  |
| 63 | 1 | 0 | 3.083872  | -0.914793 | 4.031708  |
| 64 | 1 | 0 | -0.587811 | -1.782380 | 3.402578  |
| 65 | 1 | 0 | 0.073012  | -2.061893 | 1.784807  |
| 66 | 1 | 0 | 1.748037  | -3.317711 | 2.888917  |
| 67 | 1 | 0 | 1.448501  | -2.530899 | 4.440058  |
| 68 | 1 | 0 | 5.473925  | 1.462549  | -2.067746 |
| 69 | 1 | 0 | 4.106879  | 2.338911  | -1.325883 |
| 70 | 1 | 0 | 5.571241  | -0.150944 | 1.401545  |
| 71 | 1 | 0 | 4.605288  | 1.324105  | 1.658310  |
| 72 | 1 | 0 | 7.391366  | 1.131945  | 0.379697  |
| 73 | 1 | 0 | 6.891016  | 2.248673  | 1.668583  |
| 74 | 1 | 0 | 5.499104  | 3.529812  | 0.140770  |
| 75 | 1 | 0 | 6.829316  | 3.103396  | -0.947428 |
| 76 | 1 | 0 | -4.505304 | -0.814704 | -4.037260 |
| 77 | 1 | 0 | -5.364532 | -0.573741 | -2.484336 |
| 78 | 1 | 0 | -4.542978 | -2.134130 | -2.831157 |
| 79 | 1 | 0 | -1.251826 | 3.350621  | 1.289170  |
| 80 | 1 | 0 | -3.483313 | 2.138030  | -2.173935 |
| 81 | 1 | 0 | -5.086247 | 3.980415  | -1.793911 |
| 82 | 1 | 0 | -2.823417 | 5.228177  | 1.647658  |
| 83 | 1 | 0 | -4.758871 | 5.550660  | 0.112008  |
| 84 | 1 | 0 | 2.088729  | 1.776799  | 1.282058  |
| 85 | 1 | 0 | 0.030216  | 3.883118  | -1.852200 |
| 86 | 1 | 0 | 1.468925  | 5.862311  | -1.465386 |
| 87 | 1 | 0 | 3.514075  | 3.744999  | 1.673850  |
| 88 | 1 | 0 | 3.223455  | 5.804257  | 0.303235  |

---



**4s+Cr (CO) 5+HCF3**

HF=-1891.4808706 hartree

|                                              |              |
|----------------------------------------------|--------------|
| Zero-point correction=<br>(Hartree/Particle) | 0.358331     |
| Thermal correction to Energy=                | 0.394591     |
| Thermal correction to Enthalpy=              | 0.395535     |
| Thermal correction to Gibbs Free Energy=     | 0.285010     |
| Sum of electronic and zero-point Energies=   | -1891.122540 |
| Sum of electronic and thermal Energies=      | -1891.086279 |
| Sum of electronic and thermal Enthalpies=    | -1891.085335 |
| Sum of electronic and thermal Free Energies= | -1891.195861 |

Standard orientation:

---

| Center<br>Number | Atomic<br>Number | Atomic<br>Type | Coordinates (Angstroms) |           |           |
|------------------|------------------|----------------|-------------------------|-----------|-----------|
|                  |                  |                | X                       | Y         | Z         |
| 1                | 6                | 0              | 2.220318                | 2.820495  | 0.732797  |
| 2                | 6                | 0              | 2.043305                | 1.443888  | 0.523077  |
| 3                | 6                | 0              | 2.142046                | 0.578705  | 1.625686  |
| 4                | 6                | 0              | 2.403659                | 1.075840  | 2.902689  |
| 5                | 6                | 0              | 2.572197                | 2.448534  | 3.100184  |
| 6                | 6                | 0              | 2.480213                | 3.318611  | 2.009458  |
| 7                | 6                | 0              | 1.785340                | 0.894990  | -0.826041 |
| 8                | 6                | 0              | 2.507411                | -0.139533 | -1.412817 |
| 9                | 7                | 0              | 1.911546                | -0.423936 | -2.631684 |
| 10               | 6                | 0              | 0.857177                | 0.397507  | -2.853359 |
| 11               | 6                | 0              | 0.732875                | 1.236921  | -1.753748 |
| 12               | 6                | 0              | 3.683986                | -0.891968 | -0.960309 |
| 13               | 6                | 0              | 3.782234                | -2.273795 | -1.203051 |
| 14               | 6                | 0              | 4.907712                | -2.989590 | -0.793169 |
| 15               | 6                | 0              | 5.948256                | -2.340569 | -0.124073 |

---

|    |    |   |           |           |           |
|----|----|---|-----------|-----------|-----------|
| 16 | 6  | 0 | 5.856897  | -0.967810 | 0.127995  |
| 17 | 6  | 0 | 4.739507  | -0.247719 | -0.290173 |
| 18 | 6  | 0 | -0.377161 | 2.185918  | -1.665963 |
| 19 | 8  | 0 | -1.168784 | 2.406479  | -2.578551 |
| 20 | 8  | 0 | -0.474980 | 2.782352  | -0.464878 |
| 21 | 6  | 0 | -1.574667 | 3.692738  | -0.291560 |
| 22 | 9  | 0 | -3.939250 | 1.274744  | -1.087834 |
| 23 | 6  | 0 | -3.300905 | 0.448762  | -1.925049 |
| 24 | 9  | 0 | -2.179494 | -0.009483 | -1.261627 |
| 25 | 24 | 0 | -2.145278 | -1.097745 | 0.757429  |
| 26 | 6  | 0 | -2.002182 | -2.000775 | 2.349922  |
| 27 | 8  | 0 | -1.903406 | -2.571903 | 3.355701  |
| 28 | 9  | 0 | -4.075455 | -0.611412 | -2.161678 |
| 29 | 6  | 0 | -2.910653 | -2.634183 | -0.074836 |
| 30 | 8  | 0 | -3.375092 | -3.579820 | -0.543327 |
| 31 | 6  | 0 | -0.405677 | -1.723986 | 0.262669  |
| 32 | 8  | 0 | 0.622364  | -2.174430 | 0.001455  |
| 33 | 6  | 0 | -3.901176 | -0.526146 | 1.243477  |
| 34 | 8  | 0 | -4.957924 | -0.220041 | 1.588089  |
| 35 | 6  | 0 | -1.445800 | 0.487734  | 1.592573  |
| 36 | 8  | 0 | -1.087574 | 1.415712  | 2.169487  |
| 37 | 1  | 0 | 2.270855  | -1.096798 | -3.294423 |
| 38 | 1  | 0 | 4.677274  | 0.819247  | -0.103477 |
| 39 | 1  | 0 | 2.959869  | -2.794117 | -1.686455 |
| 40 | 1  | 0 | 4.964739  | -4.057460 | -0.985905 |
| 41 | 1  | 0 | 6.663295  | -0.454112 | 0.644316  |
| 42 | 1  | 0 | 6.821951  | -2.898964 | 0.200236  |
| 43 | 1  | 0 | 2.145970  | 3.498762  | -0.111296 |
| 44 | 1  | 0 | 2.012366  | -0.487788 | 1.473338  |
| 45 | 1  | 0 | 2.471607  | 0.390266  | 3.743335  |
| 46 | 1  | 0 | 2.614261  | 4.387665  | 2.152921  |
| 47 | 1  | 0 | 2.774254  | 2.837943  | 4.094393  |

|    |   |   |           |          |           |
|----|---|---|-----------|----------|-----------|
| 48 | 1 | 0 | -1.506398 | 4.518727 | -1.004514 |
| 49 | 1 | 0 | -1.485014 | 4.057217 | 0.731217  |
| 50 | 1 | 0 | -2.524172 | 3.171058 | -0.430799 |
| 51 | 1 | 0 | -2.974696 | 0.955770 | -2.829772 |
| 52 | 1 | 0 | 0.261180  | 0.347165 | -3.751439 |

---

**INT4**

HF=-1891.4283774 hartree

|                                              |              |
|----------------------------------------------|--------------|
| Zero-point correction=                       | 0.360071     |
| (Hartree/Particle)                           |              |
| Thermal correction to Energy=                | 0.394557     |
| Thermal correction to Enthalpy=              | 0.395501     |
| Thermal correction to Gibbs Free Energy=     | 0.293150     |
| Sum of electronic and zero-point Energies=   | -1891.068306 |
| Sum of electronic and thermal Energies=      | -1891.033820 |
| Sum of electronic and thermal Enthalpies=    | -1891.032876 |
| Sum of electronic and thermal Free Energies= | -1891.135228 |

Standard orientation:

---

| Center | Atomic | Atomic | Coordinates (Angstroms) |           |           |
|--------|--------|--------|-------------------------|-----------|-----------|
| Number | Number | Type   | X                       | Y         | Z         |
| 1      | 6      | 0      | -3.932896               | -1.960508 | -0.727309 |
| 2      | 6      | 0      | -3.429498               | -0.916216 | 0.070941  |
| 3      | 6      | 0      | -4.308964               | 0.101557  | 0.484306  |
| 4      | 6      | 0      | -5.646322               | 0.081286  | 0.094458  |
| 5      | 6      | 0      | -6.134334               | -0.954995 | -0.708265 |
| 6      | 6      | 0      | -5.272493               | -1.975989 | -1.115999 |
| 7      | 6      | 0      | -2.016053               | -0.935131 | 0.479047  |

---

|    |    |   |           |           |           |
|----|----|---|-----------|-----------|-----------|
| 8  | 6  | 0 | -1.141715 | 0.091871  | 0.674760  |
| 9  | 6  | 0 | 0.172904  | -0.482793 | 1.076602  |
| 10 | 6  | 0 | -0.093413 | -1.994187 | 1.253561  |
| 11 | 7  | 0 | -1.411084 | -2.194310 | 0.659671  |
| 12 | 6  | 0 | -1.480217 | 1.508041  | 0.381526  |
| 13 | 6  | 0 | -1.851011 | 1.876095  | -0.923519 |
| 14 | 6  | 0 | -2.229367 | 3.185543  | -1.219727 |
| 15 | 6  | 0 | -2.253202 | 4.152623  | -0.212828 |
| 16 | 6  | 0 | -1.909426 | 3.794870  | 1.093961  |
| 17 | 6  | 0 | -1.531502 | 2.485168  | 1.388948  |
| 18 | 6  | 0 | 1.129142  | 0.132146  | 1.873570  |
| 19 | 8  | 0 | 1.005118  | 1.409548  | 2.215505  |
| 20 | 6  | 0 | 2.031300  | 2.057166  | 2.994458  |
| 21 | 8  | 0 | 2.109230  | -0.514647 | 2.529614  |
| 22 | 6  | 0 | 0.837480  | -3.028721 | 0.629128  |
| 23 | 9  | 0 | 2.129401  | -2.870140 | 1.075553  |
| 24 | 9  | 0 | 0.455504  | -4.264704 | 1.002022  |
| 25 | 9  | 0 | 0.866072  | -2.998801 | -0.707389 |
| 26 | 8  | 0 | 3.598499  | -2.227008 | -1.435791 |
| 27 | 6  | 0 | 2.956230  | -1.302379 | -1.176019 |
| 28 | 24 | 0 | 2.064868  | 0.343633  | -0.875349 |
| 29 | 6  | 0 | 0.584856  | -0.265952 | -1.919470 |
| 30 | 8  | 0 | -0.282323 | -0.666921 | -2.564191 |
| 31 | 6  | 0 | 3.566256  | 0.779863  | 0.188460  |
| 32 | 8  | 0 | 4.534754  | 1.013286  | 0.777055  |
| 33 | 6  | 0 | 1.402912  | 2.129650  | -0.632244 |
| 34 | 8  | 0 | 1.163568  | 3.252487  | -0.538918 |
| 35 | 6  | 0 | 2.915369  | 0.973450  | -2.374467 |
| 36 | 8  | 0 | 3.436392  | 1.378944  | -3.330082 |
| 37 | 1  | 0 | -1.983394 | -2.887370 | 1.130171  |
| 38 | 1  | 0 | -3.942072 | 0.902408  | 1.116108  |
| 39 | 1  | 0 | -3.262018 | -2.747588 | -1.058020 |

|    |   |   |           |           |           |
|----|---|---|-----------|-----------|-----------|
| 40 | 1 | 0 | -5.641160 | -2.784854 | -1.740853 |
| 41 | 1 | 0 | -6.312034 | 0.874035  | 0.424611  |
| 42 | 1 | 0 | -7.178026 | -0.967269 | -1.009861 |
| 43 | 1 | 0 | -1.276242 | 2.212754  | 2.406092  |
| 44 | 1 | 0 | -1.848085 | 1.124735  | -1.705079 |
| 45 | 1 | 0 | -2.506040 | 3.448250  | -2.237303 |
| 46 | 1 | 0 | -1.942243 | 4.536302  | 1.887992  |
| 47 | 1 | 0 | -2.545466 | 5.174042  | -0.441109 |
| 48 | 1 | 0 | 2.111167  | 1.594983  | 3.980685  |
| 49 | 1 | 0 | 1.693973  | 3.089183  | 3.082717  |
| 50 | 1 | 0 | 2.994298  | 2.015589  | 2.484806  |
| 51 | 1 | 0 | 2.266780  | -1.393827 | 2.139439  |
| 52 | 1 | 0 | -0.085590 | -2.235858 | 2.329787  |

-----

**INT5**

HF=-1891.3878958 hartree

|                                              |              |
|----------------------------------------------|--------------|
| Zero-point correction=                       | 0.358100     |
| (Hartree/Particle)                           |              |
| Thermal correction to Energy=                | 0.392559     |
| Thermal correction to Enthalpy=              | 0.393503     |
| Thermal correction to Gibbs Free Energy=     | 0.290617     |
| Sum of electronic and zero-point Energies=   | -1891.029796 |
| Sum of electronic and thermal Energies=      | -1890.995337 |
| Sum of electronic and thermal Enthalpies=    | -1890.994393 |
| Sum of electronic and thermal Free Energies= | -1891.097279 |

Standard orientation:

-----

| Center | Atomic | Atomic | Coordinates (Angstroms) |   |   |
|--------|--------|--------|-------------------------|---|---|
| Number | Number | Type   | X                       | Y | Z |

-----

|    |   |   |           |           |           |
|----|---|---|-----------|-----------|-----------|
| 1  | 1 | 0 | -1.524456 | -0.070318 | 2.014619  |
| 2  | 6 | 0 | -1.340752 | -0.014379 | 0.926256  |
| 3  | 6 | 0 | -0.018038 | -0.785627 | 0.747918  |
| 4  | 6 | 0 | -0.350041 | -1.991182 | 0.157303  |
| 5  | 6 | 0 | -2.360895 | -0.915158 | 0.261794  |
| 6  | 7 | 0 | -1.717511 | -1.998001 | -0.125398 |
| 7  | 1 | 0 | -2.159100 | -2.797941 | -0.568615 |
| 8  | 6 | 0 | 0.417615  | -3.232589 | -0.134823 |
| 9  | 9 | 0 | 0.700400  | -3.971535 | 0.959946  |
| 10 | 9 | 0 | 1.583552  | -2.990860 | -0.760303 |
| 11 | 9 | 0 | -0.322465 | -4.034458 | -0.956591 |
| 12 | 6 | 0 | -3.776125 | -0.688038 | 0.055488  |
| 13 | 6 | 0 | -6.534614 | -0.272034 | -0.275637 |
| 14 | 6 | 0 | -4.504642 | -1.428766 | -0.900248 |
| 15 | 6 | 0 | -4.453986 | 0.276124  | 0.830805  |
| 16 | 6 | 0 | -5.820775 | 0.476016  | 0.665622  |
| 17 | 6 | 0 | -5.870864 | -1.222831 | -1.058381 |
| 18 | 1 | 0 | -4.001874 | -2.142349 | -1.546819 |
| 19 | 1 | 0 | -3.909817 | 0.864256  | 1.560903  |
| 20 | 1 | 0 | -6.330132 | 1.218285  | 1.272529  |
| 21 | 1 | 0 | -6.416614 | -1.794874 | -1.802432 |
| 22 | 1 | 0 | -7.600360 | -0.109616 | -0.405536 |
| 23 | 6 | 0 | -1.480548 | 1.441371  | 0.513029  |
| 24 | 6 | 0 | -1.968995 | 4.101737  | -0.219514 |
| 25 | 6 | 0 | -1.685001 | 1.779102  | -0.831405 |
| 26 | 6 | 0 | -1.515809 | 2.445909  | 1.484695  |
| 27 | 6 | 0 | -1.759744 | 3.770430  | 1.120726  |
| 28 | 6 | 0 | -1.924391 | 3.103526  | -1.195563 |
| 29 | 1 | 0 | -1.665336 | 1.006113  | -1.592884 |
| 30 | 1 | 0 | -1.347867 | 2.190093  | 2.526503  |
| 31 | 1 | 0 | -1.785246 | 4.542210  | 1.884701  |
| 32 | 1 | 0 | -2.080982 | 3.352916  | -2.241173 |

|    |    |   |           |           |           |
|----|----|---|-----------|-----------|-----------|
| 33 | 1  | 0 | -2.161251 | 5.132723  | -0.502605 |
| 34 | 6  | 0 | 1.221430  | -0.375559 | 1.348306  |
| 35 | 8  | 0 | 1.858032  | -1.514941 | 1.873725  |
| 36 | 8  | 0 | 1.082447  | 0.653265  | 2.304713  |
| 37 | 24 | 0 | 2.351737  | 0.674726  | -0.531085 |
| 38 | 6  | 0 | 1.489119  | 2.342957  | -0.227869 |
| 39 | 8  | 0 | 1.137838  | 3.431397  | -0.066394 |
| 40 | 6  | 0 | 1.079609  | 0.071354  | -1.789910 |
| 41 | 8  | 0 | 0.319714  | -0.324026 | -2.571962 |
| 42 | 6  | 0 | 3.394041  | -0.880953 | -0.784927 |
| 43 | 8  | 0 | 4.106225  | -1.774555 | -0.970111 |
| 44 | 6  | 0 | 3.555449  | 1.243711  | 0.815074  |
| 45 | 8  | 0 | 4.287872  | 1.631538  | 1.622165  |
| 46 | 6  | 0 | 3.342936  | 1.491859  | -1.843737 |
| 47 | 8  | 0 | 3.971294  | 2.009517  | -2.677164 |
| 48 | 1  | 0 | 0.692945  | 0.250315  | 3.108552  |
| 49 | 6  | 0 | 3.145220  | -1.361201 | 2.459675  |
| 50 | 1  | 0 | 3.316046  | -2.266481 | 3.047108  |
| 51 | 1  | 0 | 3.185376  | -0.486117 | 3.115388  |
| 52 | 1  | 0 | 3.927607  | -1.277204 | 1.698281  |

-----

**INT6**

HF=-1891.3907296 hartree

|                                              |              |
|----------------------------------------------|--------------|
| Zero-point correction=<br>(Hartree/Particle) | 0.355013     |
| Thermal correction to Energy=                | 0.391261     |
| Thermal correction to Enthalpy=              | 0.392205     |
| Thermal correction to Gibbs Free Energy=     | 0.282395     |
| Sum of electronic and zero-point Energies=   | -1891.035717 |
| Sum of electronic and thermal Energies=      | -1890.999469 |
| Sum of electronic and thermal Enthalpies=    | -1890.998524 |

Sum of electronic and thermal Free Energies= -1891.108335

Standard orientation:

---

| Center<br>Number | Atomic<br>Number | Atomic<br>Type | Coordinates (Angstroms) |           |           |
|------------------|------------------|----------------|-------------------------|-----------|-----------|
|                  |                  |                | X                       | Y         | Z         |
| 1                | 6                | 0              | 2.482993                | -3.042398 | -1.031129 |
| 2                | 6                | 0              | 2.913502                | -1.704874 | -0.982183 |
| 3                | 6                | 0              | 4.244714                | -1.432766 | -0.620041 |
| 4                | 6                | 0              | 5.118419                | -2.473345 | -0.311211 |
| 5                | 6                | 0              | 4.683327                | -3.801019 | -0.368118 |
| 6                | 6                | 0              | 3.363646                | -4.081305 | -0.730779 |
| 7                | 6                | 0              | 1.992238                | -0.611769 | -1.313918 |
| 8                | 6                | 0              | 1.861758                | 0.667185  | -0.803886 |
| 9                | 6                | 0              | 0.763083                | 1.281567  | -1.528900 |
| 10               | 6                | 0              | 0.283374                | 0.340835  | -2.449822 |
| 11               | 7                | 0              | 1.025974                | -0.764771 | -2.310209 |
| 12               | 6                | 0              | 2.595927                | 1.205567  | 0.362962  |
| 13               | 6                | 0              | 2.501916                | 0.545328  | 1.599176  |
| 14               | 6                | 0              | 3.200022                | 1.019473  | 2.710049  |
| 15               | 6                | 0              | 4.004692                | 2.156681  | 2.600085  |
| 16               | 6                | 0              | 4.108363                | 2.816538  | 1.372171  |
| 17               | 6                | 0              | 3.408835                | 2.344798  | 0.260810  |
| 18               | 6                | 0              | 0.178885                | 2.558806  | -1.332615 |
| 19               | 8                | 0              | 0.878763                | 3.471892  | -0.731588 |
| 20               | 6                | 0              | 0.236887                | 4.712584  | -0.321100 |
| 21               | 8                | 0              | -1.012453               | 2.902897  | -1.720809 |
| 22               | 6                | 0              | -2.848548               | -0.129520 | -2.401548 |
| 23               | 9                | 0              | -2.922626               | 1.232799  | -1.813892 |
| 24               | 9                | 0              | -4.092014               | -0.583835 | -2.086412 |
| 25               | 9                | 0              | -2.048717               | -0.757622 | -1.310599 |

---



|    |    |   |           |           |           |
|----|----|---|-----------|-----------|-----------|
| 26 | 8  | 0 | -3.971345 | -3.338507 | 0.497424  |
| 27 | 6  | 0 | -3.383751 | -2.355055 | 0.619507  |
| 28 | 24 | 0 | -2.417780 | -0.715755 | 0.865322  |
| 29 | 6  | 0 | -0.777439 | -1.665575 | 1.008680  |
| 30 | 8  | 0 | 0.219821  | -2.235543 | 1.134538  |
| 31 | 6  | 0 | -4.057491 | 0.263266  | 0.696575  |
| 32 | 8  | 0 | -5.045183 | 0.856430  | 0.676242  |
| 33 | 6  | 0 | -1.494427 | 0.922260  | 1.072006  |
| 34 | 8  | 0 | -0.944221 | 1.925696  | 1.251841  |
| 35 | 6  | 0 | -2.651063 | -0.813634 | 2.682886  |
| 36 | 8  | 0 | -2.794809 | -0.879700 | 3.835254  |
| 37 | 1  | 0 | 0.924099  | -1.592341 | -2.883400 |
| 38 | 1  | 0 | 4.589878  | -0.404891 | -0.587495 |
| 39 | 1  | 0 | 1.447884  | -3.270892 | -1.268283 |
| 40 | 1  | 0 | 3.013666  | -5.108982 | -0.768302 |
| 41 | 1  | 0 | 6.144138  | -2.247277 | -0.033691 |
| 42 | 1  | 0 | 5.367331  | -4.610441 | -0.129395 |
| 43 | 1  | 0 | 3.490319  | 2.857638  | -0.692102 |
| 44 | 1  | 0 | 1.881551  | -0.341567 | 1.680165  |
| 45 | 1  | 0 | 3.114279  | 0.500670  | 3.660868  |
| 46 | 1  | 0 | 4.736717  | 3.698043  | 1.278240  |
| 47 | 1  | 0 | 4.548665  | 2.526036  | 3.465069  |
| 48 | 1  | 0 | -0.059365 | 5.282970  | -1.202335 |
| 49 | 1  | 0 | 1.002356  | 5.235440  | 0.248037  |
| 50 | 1  | 0 | -0.629054 | 4.480281  | 0.300097  |
| 51 | 1  | 0 | -1.652296 | 2.144773  | -1.886465 |
| 52 | 1  | 0 | -0.528815 | 0.392879  | -3.160301 |

---

**TS4**

HF=-1891.3396009

NIMAG=1 (-1580.7649 cm<sup>-1</sup>)

|                                              |              |
|----------------------------------------------|--------------|
| Zero-point correction=<br>(Hartree/Particle) | 0.353879     |
| Thermal correction to Energy=                | 0.387810     |
| Thermal correction to Enthalpy=              | 0.388754     |
| Thermal correction to Gibbs Free Energy=     | 0.287370     |
| Sum of electronic and zero-point Energies=   | -1890.994939 |
| Sum of electronic and thermal Energies=      | -1890.961008 |
| Sum of electronic and thermal Enthalpies=    | -1890.960064 |
| Sum of electronic and thermal Free Energies= | -1891.061448 |

Standard orientation:

---

| Center<br>Number | Atomic<br>Number | Atomic<br>Type | Coordinates (Angstroms) |           |           |
|------------------|------------------|----------------|-------------------------|-----------|-----------|
|                  |                  |                | X                       | Y         | Z         |
| 1                | 6                | 0              | 1.891485                | -3.140509 | -1.207947 |
| 2                | 6                | 0              | 1.905550                | -4.119755 | -0.212690 |
| 3                | 6                | 0              | 1.686910                | -3.758560 | 1.118795  |
| 4                | 6                | 0              | 1.462294                | -2.424321 | 1.457013  |
| 5                | 6                | 0              | 1.459832                | -1.437819 | 0.464993  |
| 6                | 6                | 0              | 1.673941                | -1.804756 | -0.871201 |
| 7                | 6                | 0              | 1.341082                | 0.026193  | 0.807815  |
| 8                | 6                | 0              | 0.068096                | 0.835798  | 0.670086  |
| 9                | 6                | 0              | 0.434239                | 2.044992  | 0.144791  |
| 10               | 7                | 0              | 1.816098                | 2.040176  | -0.106573 |
| 11               | 6                | 0              | 2.404862                | 0.911549  | 0.239340  |
| 12               | 6                | 0              | -1.249056               | 0.440328  | 1.163293  |
| 13               | 24               | 0              | -2.429597               | -0.665007 | -0.475676 |
| 14               | 6                | 0              | -3.477753               | -1.466324 | -1.764139 |
| 15               | 8                | 0              | -4.145082               | -1.967388 | -2.576031 |

---

|    |   |   |           |           |           |
|----|---|---|-----------|-----------|-----------|
| 16 | 6 | 0 | -0.324150 | 3.299768  | -0.137945 |
| 17 | 9 | 0 | 0.413376  | 4.086497  | -0.972038 |
| 18 | 6 | 0 | 3.817215  | 0.639330  | 0.052251  |
| 19 | 6 | 0 | 4.567077  | 1.345889  | -0.910738 |
| 20 | 6 | 0 | 5.925056  | 1.088457  | -1.067692 |
| 21 | 6 | 0 | 6.552741  | 0.124001  | -0.272667 |
| 22 | 6 | 0 | 5.815128  | -0.587263 | 0.679250  |
| 23 | 6 | 0 | 4.456369  | -0.338337 | 0.841343  |
| 24 | 9 | 0 | -0.579749 | 4.036897  | 0.960338  |
| 25 | 9 | 0 | -1.498124 | 3.056233  | -0.744667 |
| 26 | 8 | 0 | -1.786255 | 1.548276  | 1.782960  |
| 27 | 6 | 0 | -3.040619 | 1.415848  | 2.442791  |
| 28 | 8 | 0 | -0.842394 | -0.643012 | 2.476115  |
| 29 | 6 | 0 | -1.579564 | -2.346809 | -0.251826 |
| 30 | 8 | 0 | -1.210812 | -3.439735 | -0.162867 |
| 31 | 6 | 0 | -1.168039 | -0.114136 | -1.770609 |
| 32 | 8 | 0 | -0.411520 | 0.230980  | -2.578544 |
| 33 | 6 | 0 | -3.421652 | 0.924713  | -0.750975 |
| 34 | 8 | 0 | -4.079163 | 1.853695  | -0.956472 |
| 35 | 6 | 0 | -3.622808 | -1.202813 | 0.894257  |
| 36 | 8 | 0 | -4.351097 | -1.572247 | 1.714061  |
| 37 | 1 | 0 | 1.502732  | 0.149623  | 2.192963  |
| 38 | 1 | 0 | 2.299116  | 2.853991  | -0.474725 |
| 39 | 1 | 0 | 4.085463  | 2.066912  | -1.564846 |
| 40 | 1 | 0 | 3.890402  | -0.890765 | 1.582499  |
| 41 | 1 | 0 | 6.299980  | -1.337029 | 1.296531  |
| 42 | 1 | 0 | 6.491175  | 1.630550  | -1.818610 |
| 43 | 1 | 0 | 7.612103  | -0.077478 | -0.400040 |
| 44 | 1 | 0 | 1.674681  | -1.045868 | -1.647540 |
| 45 | 1 | 0 | 1.278464  | -2.138934 | 2.486989  |
| 46 | 1 | 0 | 1.690125  | -4.516016 | 1.897371  |
| 47 | 1 | 0 | 2.054096  | -3.412435 | -2.246888 |

|    |   |   |           |           |           |
|----|---|---|-----------|-----------|-----------|
| 48 | 1 | 0 | 2.081007  | -5.159475 | -0.473706 |
| 49 | 1 | 0 | -1.179268 | -1.484618 | 2.134675  |
| 50 | 1 | 0 | -3.161288 | 2.324944  | 3.036181  |
| 51 | 1 | 0 | -3.030387 | 0.541477  | 3.097798  |
| 52 | 1 | 0 | -3.869115 | 1.340061  | 1.731591  |

---

### TS5

HF=-1891.3335922

NIMAG=1 -1481.4718 cm<sup>-1</sup>)

|                                              |              |
|----------------------------------------------|--------------|
| Zero-point correction=                       | 0.352913     |
| (Hartree/Particle)                           |              |
| Thermal correction to Energy=                | 0.387484     |
| Thermal correction to Enthalpy=              | 0.388428     |
| Thermal correction to Gibbs Free Energy=     | 0.285971     |
| Sum of electronic and zero-point Energies=   | -1890.974558 |
| Sum of electronic and thermal Energies=      | -1890.939987 |
| Sum of electronic and thermal Enthalpies=    | -1890.939043 |
| Sum of electronic and thermal Free Energies= | -1891.041500 |

Standard orientation:

---

| Center<br>Number | Atomic<br>Number | Atomic<br>Type | Coordinates (Angstroms) |          |           |
|------------------|------------------|----------------|-------------------------|----------|-----------|
|                  |                  |                | X                       | Y        | Z         |
| 1                | 6                | 0              | 2.239081                | 1.729074 | 0.473485  |
| 2                | 6                | 0              | 1.447551                | 1.838675 | -0.682397 |
| 3                | 6                | 0              | 1.353040                | 3.092221 | -1.310844 |
| 4                | 6                | 0              | 2.020043                | 4.202954 | -0.795901 |
| 5                | 6                | 0              | 2.800248                | 4.081665 | 0.357936  |

---

|    |    |   |           |           |           |
|----|----|---|-----------|-----------|-----------|
| 6  | 6  | 0 | 2.909755  | 2.838722  | 0.987213  |
| 7  | 6  | 0 | 0.716410  | 0.683188  | -1.233350 |
| 8  | 6  | 0 | 1.154831  | -0.604042 | -1.387967 |
| 9  | 7  | 0 | 0.101374  | -1.420857 | -1.842167 |
| 10 | 6  | 0 | -0.949978 | -0.601031 | -2.308263 |
| 11 | 6  | 0 | -0.714378 | 0.693144  | -1.613615 |
| 12 | 6  | 0 | 2.456261  | -1.226921 | -1.120887 |
| 13 | 6  | 0 | 3.658777  | -0.545863 | -1.379585 |
| 14 | 6  | 0 | 4.882794  | -1.155967 | -1.116399 |
| 15 | 6  | 0 | 4.927919  | -2.454369 | -0.596885 |
| 16 | 6  | 0 | 3.738330  | -3.142102 | -0.345927 |
| 17 | 6  | 0 | 2.509758  | -2.536073 | -0.608454 |
| 18 | 6  | 0 | -1.636180 | 1.577766  | -1.191513 |
| 19 | 24 | 0 | -0.836569 | -0.570455 | 1.891304  |
| 20 | 6  | 0 | -2.592727 | -0.000671 | 1.412919  |
| 21 | 8  | 0 | -3.658439 | 0.361467  | 1.155620  |
| 22 | 6  | 0 | -2.284233 | -1.324335 | -2.373038 |
| 23 | 9  | 0 | -3.145540 | -0.801099 | -3.248683 |
| 24 | 9  | 0 | -2.064589 | -2.610987 | -2.744203 |
| 25 | 9  | 0 | -2.895101 | -1.368041 | -1.161650 |
| 26 | 8  | 0 | -1.456870 | 2.523273  | -0.283071 |
| 27 | 6  | 0 | -1.936049 | 3.856773  | -0.584929 |
| 28 | 6  | 0 | -1.148833 | -2.304332 | 1.126149  |
| 29 | 8  | 0 | -1.323468 | -3.357653 | 0.695889  |
| 30 | 6  | 0 | -0.485070 | 1.200689  | 2.544256  |
| 31 | 8  | 0 | -0.297060 | 2.257159  | 2.959773  |
| 32 | 6  | 0 | -1.438929 | -1.120343 | 3.535483  |
| 33 | 8  | 0 | -1.821219 | -1.468061 | 4.574239  |
| 34 | 6  | 0 | 0.943662  | -1.107755 | 2.350064  |
| 35 | 8  | 0 | 2.001468  | -1.439427 | 2.664350  |
| 36 | 8  | 0 | -3.126826 | 1.469790  | -1.762755 |
| 37 | 1  | 0 | 0.329250  | -2.245601 | -2.382829 |

|    |   |   |           |           |           |
|----|---|---|-----------|-----------|-----------|
| 38 | 1 | 0 | 3.625860  | 0.457293  | -1.790647 |
| 39 | 1 | 0 | 1.586859  | -3.067668 | -0.393956 |
| 40 | 1 | 0 | 3.764522  | -4.149735 | 0.059033  |
| 41 | 1 | 0 | 5.804671  | -0.620057 | -1.323875 |
| 42 | 1 | 0 | 5.884588  | -2.926709 | -0.392816 |
| 43 | 1 | 0 | 0.753095  | 3.187744  | -2.211722 |
| 44 | 1 | 0 | 2.330755  | 0.768413  | 0.967502  |
| 45 | 1 | 0 | 3.511736  | 2.732435  | 1.885612  |
| 46 | 1 | 0 | 1.932588  | 5.163139  | -1.297190 |
| 47 | 1 | 0 | 3.318224  | 4.947062  | 0.761721  |
| 48 | 1 | 0 | -1.352766 | 4.280024  | -1.407286 |
| 49 | 1 | 0 | -1.776170 | 4.432217  | 0.325885  |
| 50 | 1 | 0 | -2.994420 | 3.825678  | -0.847214 |
| 51 | 1 | 0 | -3.651933 | 1.376568  | -0.945600 |
| 52 | 1 | 0 | -0.724934 | -0.301526 | -3.969602 |

---

### TS6

HF=-1891.3752961 Hartree

NIMAG=1 (-189.3453 cm<sup>-1</sup>)

|                                              |              |
|----------------------------------------------|--------------|
| Zero-point correction=                       | 0.355504     |
| (Hartree/Particle)                           |              |
| Thermal correction to Energy=                | 0.390831     |
| Thermal correction to Enthalpy=              | 0.391775     |
| Thermal correction to Gibbs Free Energy=     | 0.284707     |
| Sum of electronic and zero-point Energies=   | -1891.024218 |
| Sum of electronic and thermal Energies=      | -1890.988891 |
| Sum of electronic and thermal Enthalpies=    | -1890.987946 |
| Sum of electronic and thermal Free Energies= | -1891.095015 |

## Standard orientation:

| Center<br>Number | Atomic<br>Number | Atomic<br>Type | Coordinates (Angstroms) |           |           |
|------------------|------------------|----------------|-------------------------|-----------|-----------|
|                  |                  |                | X                       | Y         | Z         |
| 1                | 6                | 0              | -4.027929               | -1.928534 | -0.714724 |
| 2                | 6                | 0              | -3.661859               | -0.803331 | 0.047224  |
| 3                | 6                | 0              | -4.511318               | 0.319182  | 0.042107  |
| 4                | 6                | 0              | -5.681398               | 0.318104  | -0.713337 |
| 5                | 6                | 0              | -6.034198               | -0.804489 | -1.470235 |
| 6                | 6                | 0              | -5.203718               | -1.927653 | -1.465902 |
| 7                | 6                | 0              | -2.426285               | -0.815852 | 0.838098  |
| 8                | 6                | 0              | -1.521095               | 0.177563  | 1.112567  |
| 9                | 6                | 0              | -0.455342               | -0.430126 | 1.925762  |
| 10               | 6                | 0              | -0.748193               | -1.871174 | 2.001172  |
| 11               | 7                | 0              | -2.008939               | -2.003384 | 1.460449  |
| 12               | 6                | 0              | -1.553935               | 1.541657  | 0.541764  |
| 13               | 6                | 0              | -1.629313               | 1.706368  | -0.852581 |
| 14               | 6                | 0              | -1.672198               | 2.977568  | -1.424866 |
| 15               | 6                | 0              | -1.643529               | 4.112265  | -0.610649 |
| 16               | 6                | 0              | -1.580116               | 3.962017  | 0.777689  |
| 17               | 6                | 0              | -1.538115               | 2.689933  | 1.349166  |
| 18               | 6                | 0              | 0.645092                | 0.125475  | 2.522556  |
| 19               | 8                | 0              | 0.778708                | 1.445094  | 2.638338  |
| 20               | 6                | 0              | 2.026078                | 1.992170  | 3.108556  |
| 21               | 8                | 0              | 1.643899                | -0.593008 | 3.073784  |
| 22               | 6                | 0              | 0.628535                | -2.825314 | 0.692962  |
| 23               | 9                | 0              | 1.924939                | -2.355074 | 0.962050  |
| 24               | 9                | 0              | 0.722142                | -4.169836 | 0.697793  |
| 25               | 9                | 0              | 0.377252                | -2.452492 | -0.592724 |
| 26               | 8                | 0              | 3.278285                | -2.595176 | -2.188641 |
| 27               | 6                | 0              | 2.887583                | -1.600437 | -1.760582 |

|    |    |   |           |           |           |
|----|----|---|-----------|-----------|-----------|
| 28 | 24 | 0 | 2.291117  | 0.088169  | -1.078928 |
| 29 | 6  | 0 | 0.943292  | 0.155741  | -2.439146 |
| 30 | 8  | 0 | 0.164941  | 0.197158  | -3.287258 |
| 31 | 6  | 0 | 3.591911  | -0.032250 | 0.310409  |
| 32 | 8  | 0 | 4.397419  | -0.088544 | 1.134301  |
| 33 | 6  | 0 | 1.741189  | 1.791203  | -0.383943 |
| 34 | 8  | 0 | 1.532221  | 2.860732  | -0.013264 |
| 35 | 6  | 0 | 3.482185  | 0.958655  | -2.165708 |
| 36 | 8  | 0 | 4.238197  | 1.506680  | -2.855529 |
| 37 | 1  | 0 | -2.539698 | -2.860036 | 1.462353  |
| 38 | 1  | 0 | -4.248486 | 1.187127  | 0.637042  |
| 39 | 1  | 0 | -3.373622 | -2.795825 | -0.743339 |
| 40 | 1  | 0 | -5.465755 | -2.802726 | -2.054259 |
| 41 | 1  | 0 | -6.325268 | 1.193342  | -0.705027 |
| 42 | 1  | 0 | -6.948786 | -0.802992 | -2.056560 |
| 43 | 1  | 0 | -1.483401 | 2.581015  | 2.426528  |
| 44 | 1  | 0 | -1.657785 | 0.825978  | -1.484913 |
| 45 | 1  | 0 | -1.721001 | 3.078655  | -2.505908 |
| 46 | 1  | 0 | -1.564688 | 4.839346  | 1.419151  |
| 47 | 1  | 0 | -1.671154 | 5.104588  | -1.052657 |
| 48 | 1  | 0 | 2.167947  | 1.762699  | 4.167562  |
| 49 | 1  | 0 | 1.929359  | 3.066925  | 2.960386  |
| 50 | 1  | 0 | 2.869032  | 1.604955  | 2.533341  |
| 51 | 1  | 0 | 1.779450  | -1.413065 | 2.561220  |
| 52 | 1  | 0 | -0.502669 | -2.461654 | 2.878128  |

---



## SECTION 7

### HPLC analysis of the effect of water on reaction of **1a** and **2a**.

The analysis was performed using HPLC with UV-Visible detector of Agilent Technologies 1260 model with Eclipse XDB-C18 column of 5  $\mu\text{m}$  and 4.6 x 250 mm. All samples were run with flow of 70% MeCN and 30% MeOH (1 mL/min), detected at 280 nm and prepared using commercial grade THF without further purification (TEDIA, www.T2-P2.com, #TS2123-001, with 0.02% of water). The standards for the calibration curve were prepared with 12 mg of compound **4a** in 5.0 mL of THF. Then, 100  $\mu\text{l}$  of the solution were taken and calibrated to 1000  $\mu\text{l}$  to have a final concentration of 0.24 mg/ml, and from here, 1:2 dilutions were made to have concentrations of 0.12 mg/mL, 0.06 mg/ml and 0.03 mg/mL. The reactions were carried out using 100 mg (1 equiv) of carbene **1a** and 99 mg (1.5 equiv) of oxazolone **2a** (1.5 equiv) in 15 mL of THF. The corresponding amounts of water were added, stirring for 5 minutes and after 40  $\mu\text{l}$  of TEA (1 equiv) were also integrated. Then, 15  $\mu\text{l}$  was gauged to 1000  $\mu\text{l}$ , which were injected into the equipment.

**Table 1.** Reaction performance when adding water to THF.

| Entry | Eq H <sub>2</sub> O | AUC        | Yield (%) |
|-------|---------------------|------------|-----------|
| 1     | --                  | 1152.7778  | 76.30     |
| 2     | 0.02                | 1156.58875 | 76.51     |
| 3     | 0.05                | 1163.18994 | 76.95     |
| 4     | 0.07                | 1138.79236 | 75.31     |
| 5     | 0.1                 | 1046.18591 | 69.06     |
| 6     | 0.3                 | 573.33301  | 37.18     |
| 7     | 0.5                 | 373.68301  | 23.71     |
| 8     | 1                   | 163.49109  | 09.54     |

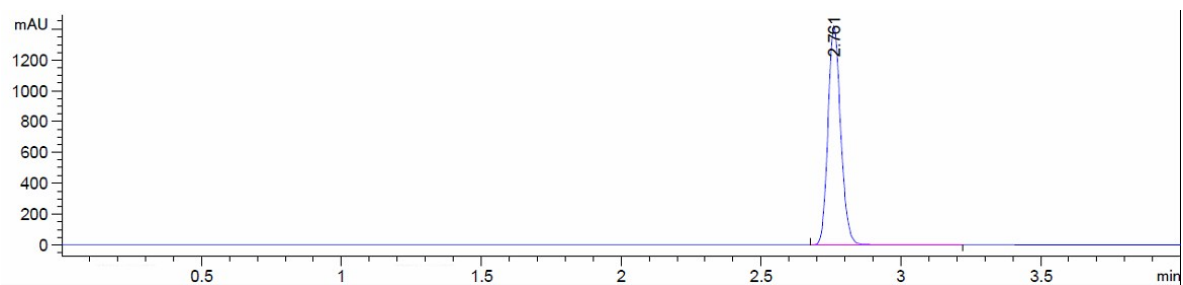

**Scheme 1.** Chromatogram of pyrrole **4a**.

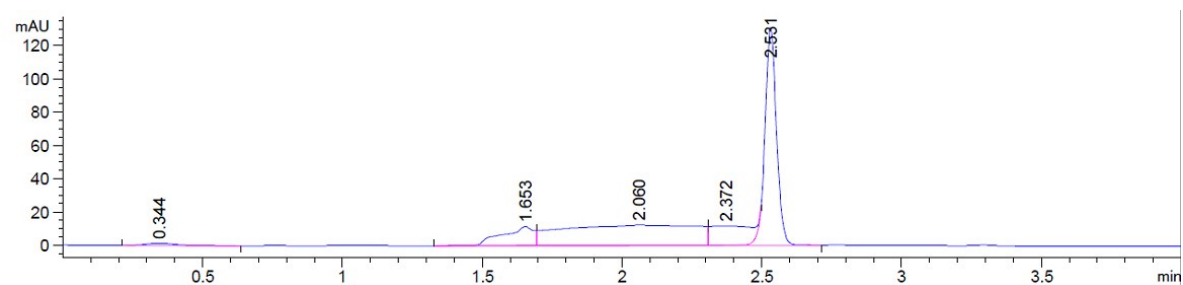

**Scheme 2.** Chromatogram of oxazolone **2a**.

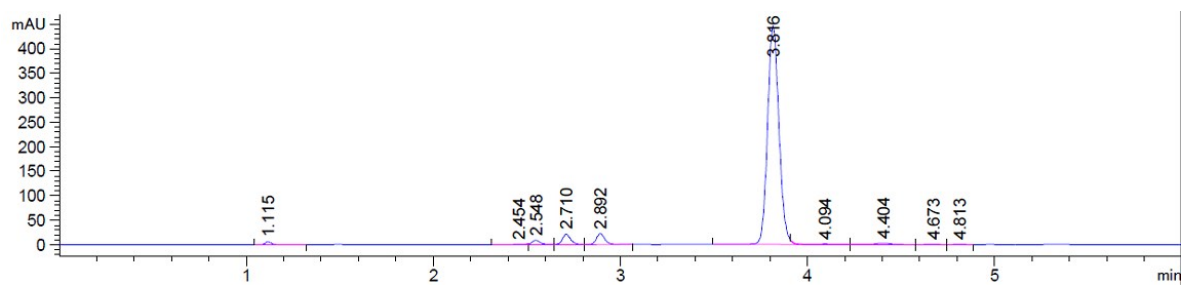

**Scheme 3.** Chromatogram of carbene **1a**.

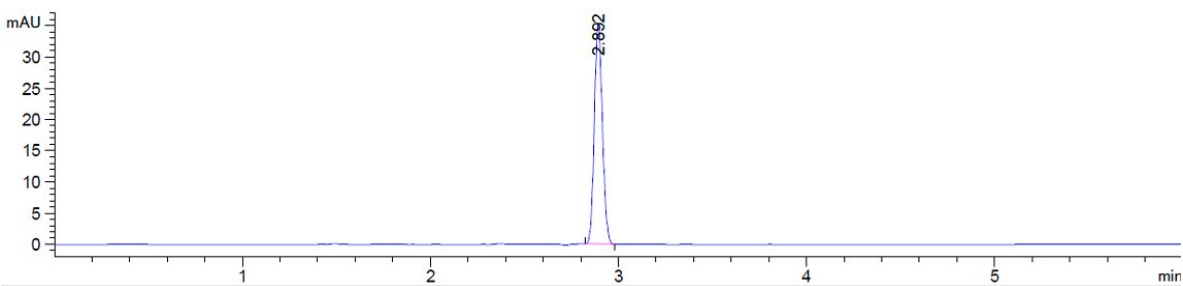

**Scheme 4.** Chromatogram of  $\text{Cr}(\text{CO})_6$

**Graph 1.** Reaction performance when adding water to THF.

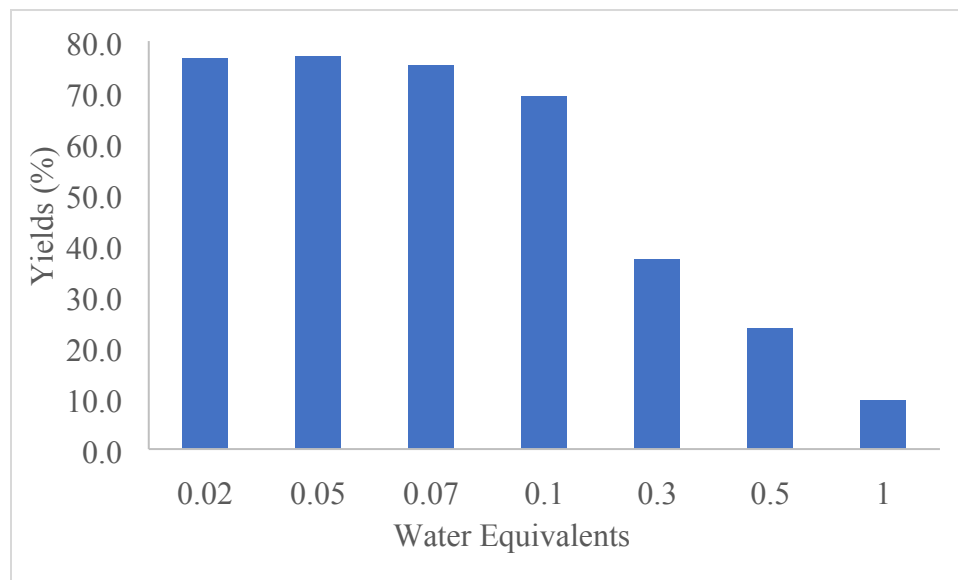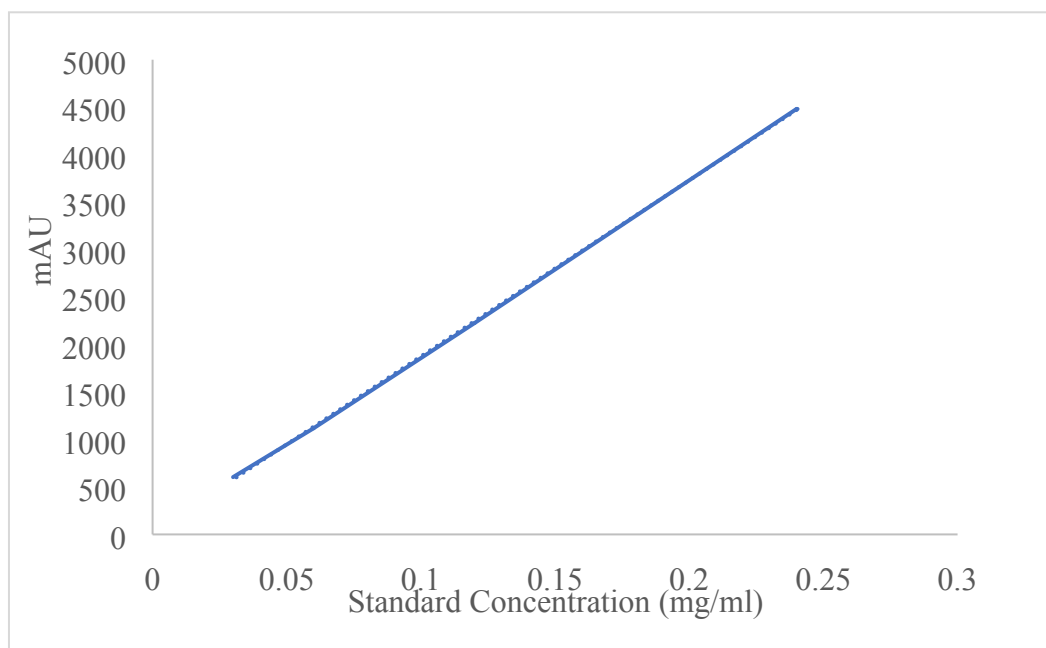

**Scheme 5.** Calibration curve of compound **4a**.

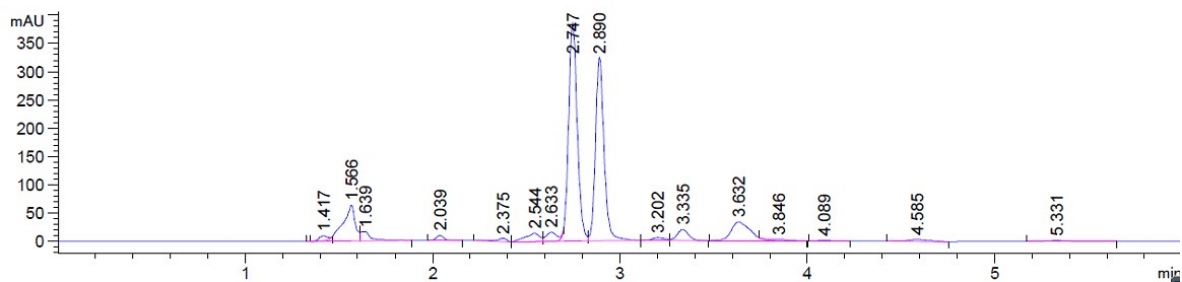

**Scheme 6.** Chromatogram of reaction crude with 0.02 eq. of H<sub>2</sub>O.

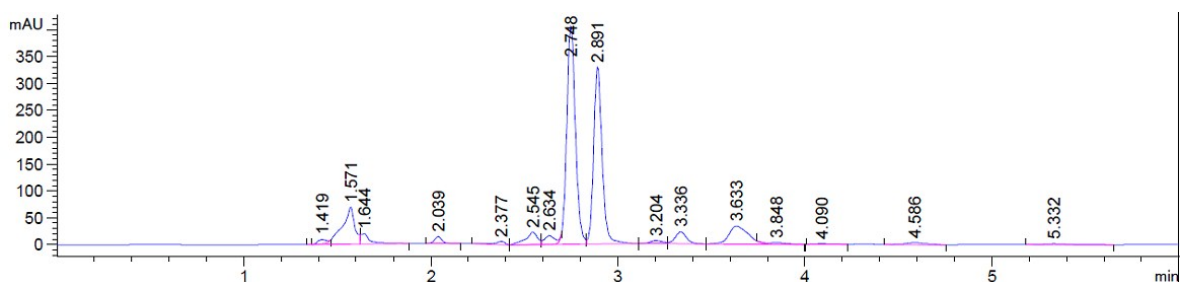

**Scheme 7.** Chromatogram of reaction crude with 0.05 eq. of H<sub>2</sub>O.

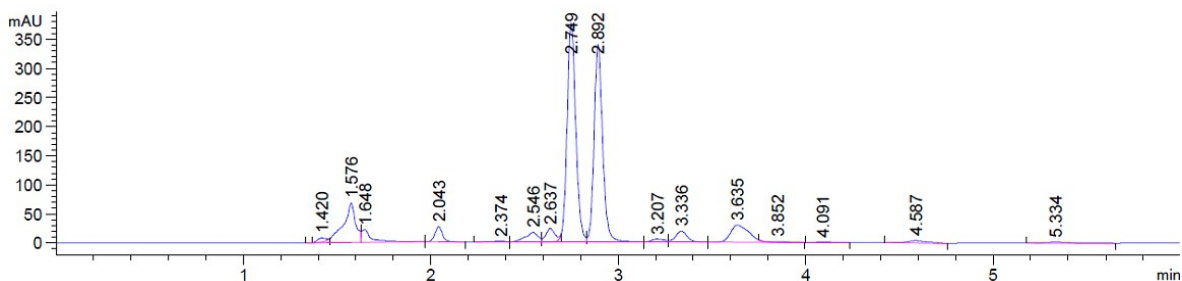

**Scheme 8.** Chromatogram of reaction crude with 0.07 eq. of H<sub>2</sub>O.

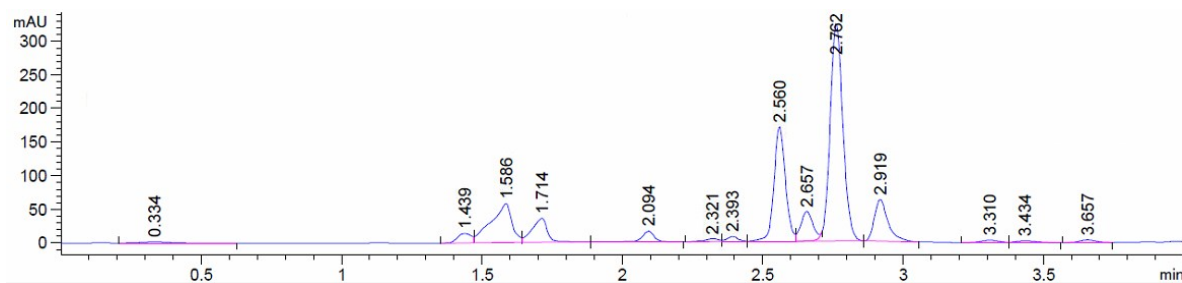

**Scheme 9.** Chromatogram of reaction crude with 0.1 eq. of H<sub>2</sub>O.

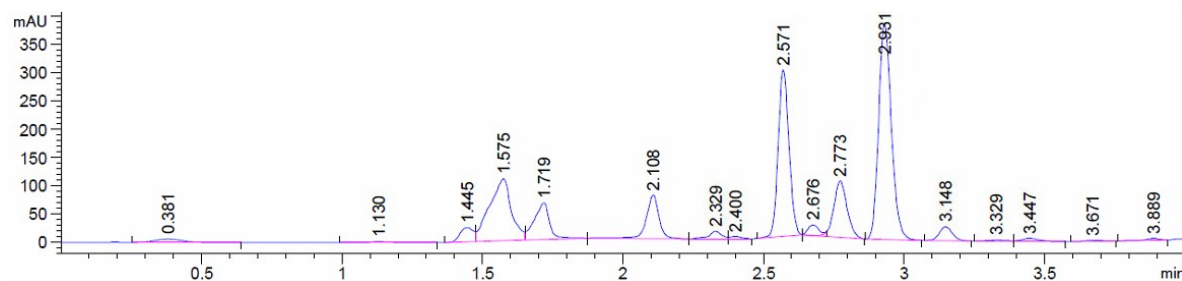

**Scheme 10.** Chromatogram of reaction crude with 0.3 eq. of H<sub>2</sub>O.

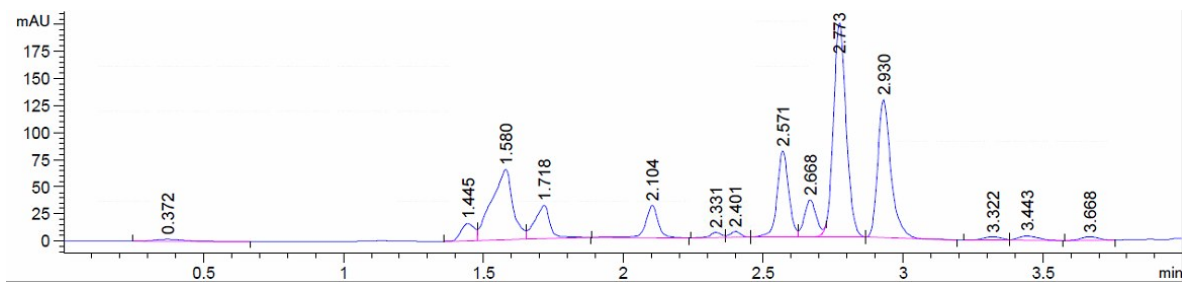

**Scheme 11.** Chromatogram of reaction crude with 0.5 eq. of H<sub>2</sub>O.
